# Supplementary material for: Relative and Absolute Stereochemistry of Diacarperoxides: Antimalarial Norditerpene Endoperoxides from Marine Sponge Diacarnus megaspinorhabdosa
Source: PubMed Central journal article supplement (PMC4145323; doi:10.3390/md12084399), 2014-08-08
Supplement: marinedrugs-12-04399-s001.pdf [file marinedrugs-12-04399-s001.pdf]

## Supplementary Information

**Figure S1.** High resolution ESI mass spectrum of diacarperoxide H (1).

**Figure S2.** IR spectrum of diacarperoxide H (1).

**Figure S3.**  $^1\text{H}$  NMR spectrum of diacarperoxide H (1) in  $\text{CDCl}_3$ .

**Figure S4.**  $^{13}\text{C}$  NMR spectrum of diacarperoxide H (1) in  $\text{CDCl}_3$ .

**Figure S5.**  $^1\text{H}$ - $^1\text{H}$  COSY spectrum of diacarperoxide H (1)  $\text{CDCl}_3$ .

**Figure S6.** HSQC spectrum of diacarperoxide H (1) in  $\text{CDCl}_3$ .

**Figure S7.** HMBC spectrum of diacarperoxide H (1) in  $\text{CDCl}_3$ .

**Figure S8.** NOESY spectrum of diacarperoxide H (1) in  $\text{CDCl}_3$ .

**Figure S9.** High resolution ESI mass spectrum of diacarperoxide I (2).

**Figure S10.** IR spectrum of diacarperoxide I (2).

**Figure S11.**  $^1\text{H}$  NMR spectrum of diacarperoxide I (2) in  $\text{CDCl}_3$ .

**Figure S12.**  $^{13}\text{C}$  NMR spectrum of diacarperoxide I (2) in  $\text{CDCl}_3$ .

**Figure S13.**  $^1\text{H}$ - $^1\text{H}$  COSY spectrum of diacarperoxide I (2)  $\text{CDCl}_3$ .

**Figure S14.** HSQC spectrum of diacarperoxide I (2) in  $\text{CDCl}_3$ .

**Figure S15.** HMBC spectrum of diacarperoxide I (2) in  $\text{CDCl}_3$ .

**Figure S16.** NOESY spectrum of diacarperoxide I (2) in DMSO.

**Figure S17.** High resolution ESI mass spectrum of diacarperoxide J (3).

**Figure S18.** IR spectrum of diacarperoxide J (3).

**Figure S19.**  $^1\text{H}$  NMR spectrum of diacarperoxide J (3) in  $\text{CDCl}_3$ .

**Figure S20.**  $^{13}\text{C}$  NMR spectrum of diacarperoxide J (3) in  $\text{CDCl}_3$ .

**Figure S21.**  $^1\text{H}$ - $^1\text{H}$  COSY spectrum of diacarperoxide J (3)  $\text{CDCl}_3$ .

**Figure S22.** HSQC spectrum of diacarperoxide J (3) in  $\text{CDCl}_3$ .

**Figure S23.** HMBC spectrum of diacarperoxide J (3) in  $\text{CDCl}_3$ .

**Figure S24.** NOESY spectrum of diacarperoxide J (3) in DMSO.

**Figure S25.** High resolution ESI mass spectrum of diacarperoxide K (4).

**Figure S26.** IR spectrum of diacarperoxide K (4).

**Figure S27.**  $^1\text{H}$  NMR spectrum of diacarperoxide K (4) in  $\text{CDCl}_3$ .

**Figure S28.**  $^{13}\text{C}$  NMR spectrum of diacarperoxide K (4) in  $\text{CDCl}_3$ .

**Figure S29.**  $^1\text{H}$ - $^1\text{H}$  COSY spectrum of diacarperoxide K (4)  $\text{CDCl}_3$ .

**Figure S30.** HSQC spectrum of diacarperoxide K (4) in  $\text{CDCl}_3$ .

**Figure S31.** HMBC spectrum of diacarperoxide K (4) in  $\text{CDCl}_3$ .

**Figure S32.** NOESY spectrum of diacarperoxide K (4) in  $\text{CDCl}_3$ .

**Figure S33.** High resolution ESI mass spectrum of diacarperoxide L (5).

**Figure S34.** IR spectrum of diacarperoxide L (5).

**Figure S35.**  $^1\text{H}$  NMR spectrum of diacarperoxide L (5) in  $\text{CDCl}_3$ .

**Figure S36.**  $^{13}\text{C}$  NMR spectrum of diacarperoxide L (5) in  $\text{CDCl}_3$ .

**Figure S37.**  $^1\text{H}$ - $^1\text{H}$  COSY spectrum of diacarperoxide L (5)  $\text{CDCl}_3$ .

**Figure S38.** HSQC spectrum of diacarperoxide L (5) in  $\text{CDCl}_3$ .

**Figure S39.** HMBC spectrum of diacarperoxide L (5) in  $\text{CDCl}_3$ .

**Figure S40.** NOESY spectrum of diacarperoxide L (5) in  $\text{CDCl}_3$ .

**Figure S41.** High resolution ESI mass spectrum of diacardiol B (6).

- Figure S42.** IR spectrum of diacardiol B (**6**).
- Figure S43.**  $^1\text{H}$  NMR spectrum of diacardiol B (**6**) in  $\text{CDCl}_3$ .
- Figure S44.**  $^{13}\text{C}$  NMR spectrum of diacardiol B (**6**) in  $\text{CDCl}_3$ .
- Figure S45.**  $^1\text{H}$ - $^1\text{H}$  COSY spectrum of diacardiol B (**6**)  $\text{CDCl}_3$ .
- Figure S46.** HSQC spectrum of diacardiol B (**6**) in  $\text{CDCl}_3$ .
- Figure S47.** HMBC spectrum of diacardiol B (**6**) in  $\text{CDCl}_3$ .
- Figure S48.** NOESY spectrum of diacardiol B (**6**) in  $\text{CDCl}_3$ .
- Figure S49.**  $^1\text{H}$  NMR spectrum of (*S*)-MTPA ester **6a** in  $\text{CDCl}_3$ .
- Figure S50.**  $^1\text{H}$  NMR spectrum of (*R*)-MTPA ester **6b** in  $\text{CDCl}_3$ .
- Figure S51.**  $^1\text{H}$  NMR spectrum of diol derived from nuapapuina A methyl ester in  $\text{CDCl}_3$ .
- Figure S52.** Dominate conformations of compounds **1–5**.
- Figure S53.** Calculated ECD spectra of **1**.
- Figure S54.** Calculated ECD spectra of **2**.
- Figure S55.** Calculated ECD spectra of **3**.
- Figure S56.** Calculated ECD spectra of **4**.
- Figure S57.** Calculated ECD spectra of **5**.
- Table S1.** Calculated thermodynamic data of **1**.
- Table S2.** Calculated relative Boltzmann populations of **1**.
- Table S3.** Calculated thermodynamic data of **2**.
- Table S4.** Calculated relative Boltzmann populations of **2**.
- Table S5.** Calculated thermodynamic data of **3**.
- Table S6.** Calculated relative Boltzmann populations of **3**.
- Table S7.** Calculated thermodynamic data of **4**.
- Table S8.** Calculated relative Boltzmann populations of **4**.
- Table S9.** Calculated thermodynamic data of **5**.
- Table S10.** Calculated relative Boltzmann populations of **5**.
- Table S11.** Cartesian coordinates of the lowest energy conformation of **1–5**.
- Figure S58.** A-value study of the endoperoxide core on **type I** and **type II** model.
- Table S12.** Calculated thermodynamic data of **type I** and **type II** model.
- Table S13.** Cartesian coordinates of the lowest energy conformation of **type I** model.
- Table S14.** Cartesian coordinates of the lowest energy conformation of **type II** model.
- Figure S59.** Study of the 1,3-diaxial interaction vs. 1,3-allylic strain on the model **m1** and **m2**.
- Table S15.** Calculated thermodynamic data of the model **m1** and **m2**.
- Table S16.** Cartesian coordinates of the lowest energy conformations of **m1** and **m2**.
- Table S17.** Bioactivities of the compound **1–6** against A549 (lung carcinoma).
- Table S18.** Bioactivities of the compound **1–6** against HeLa (cervical cancer).
- Table S19.** Bioactivities of the compound **1–6** against QGY-7703 (hepatocarcinoma).
- Table S20.** Bioactivities of the compound **1–6** against MDA-MB-231 (human breast adenocarcinoma).

Figure S1. High resolution ESI mass spectrum of diacarpoxide H (1).

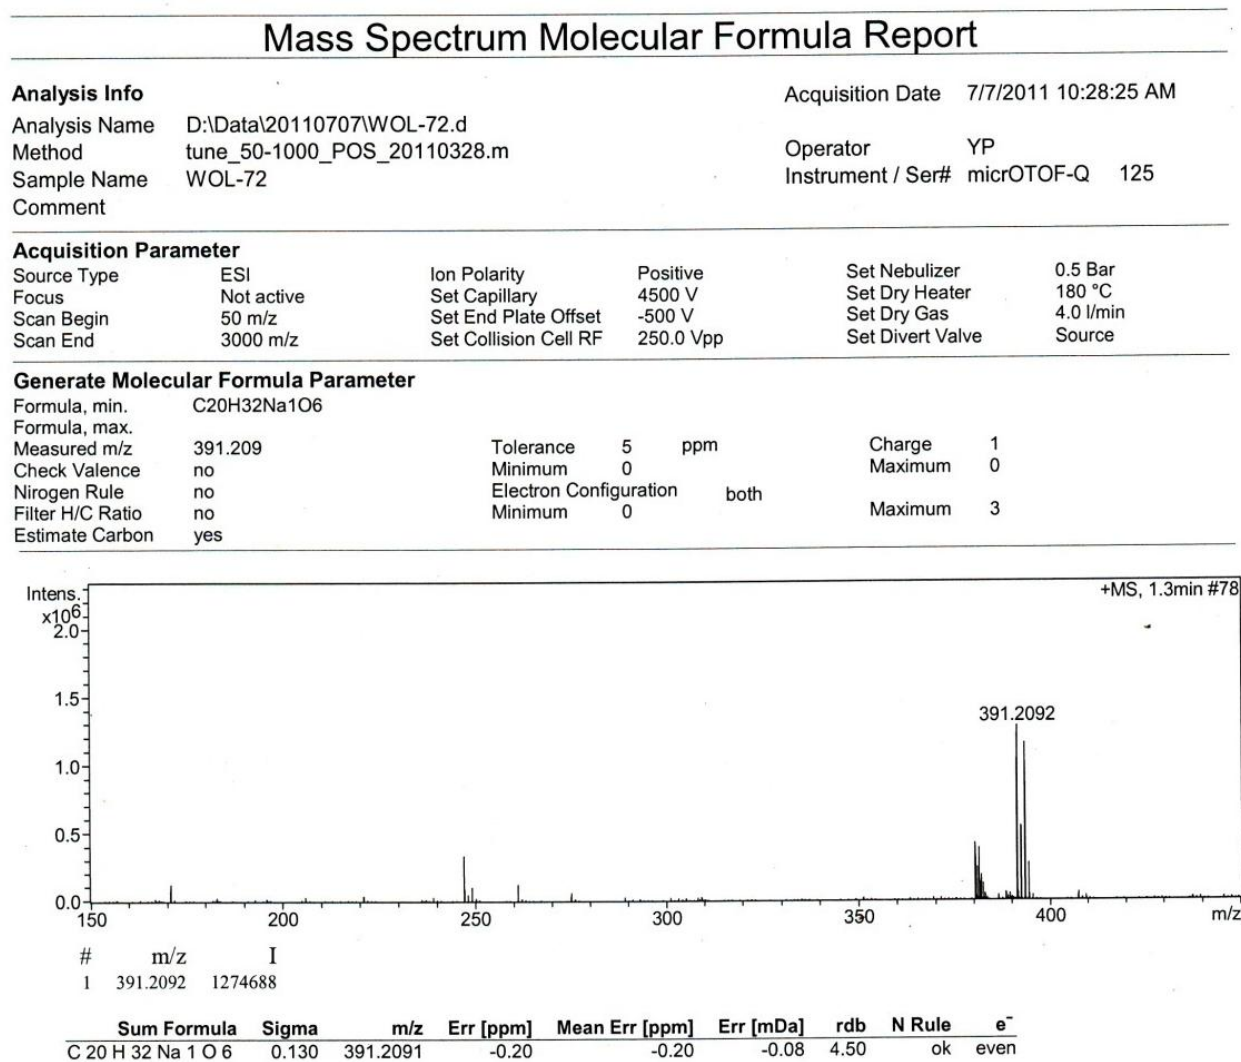

Figure S2. IR spectrum of diacarperoxide H (1).

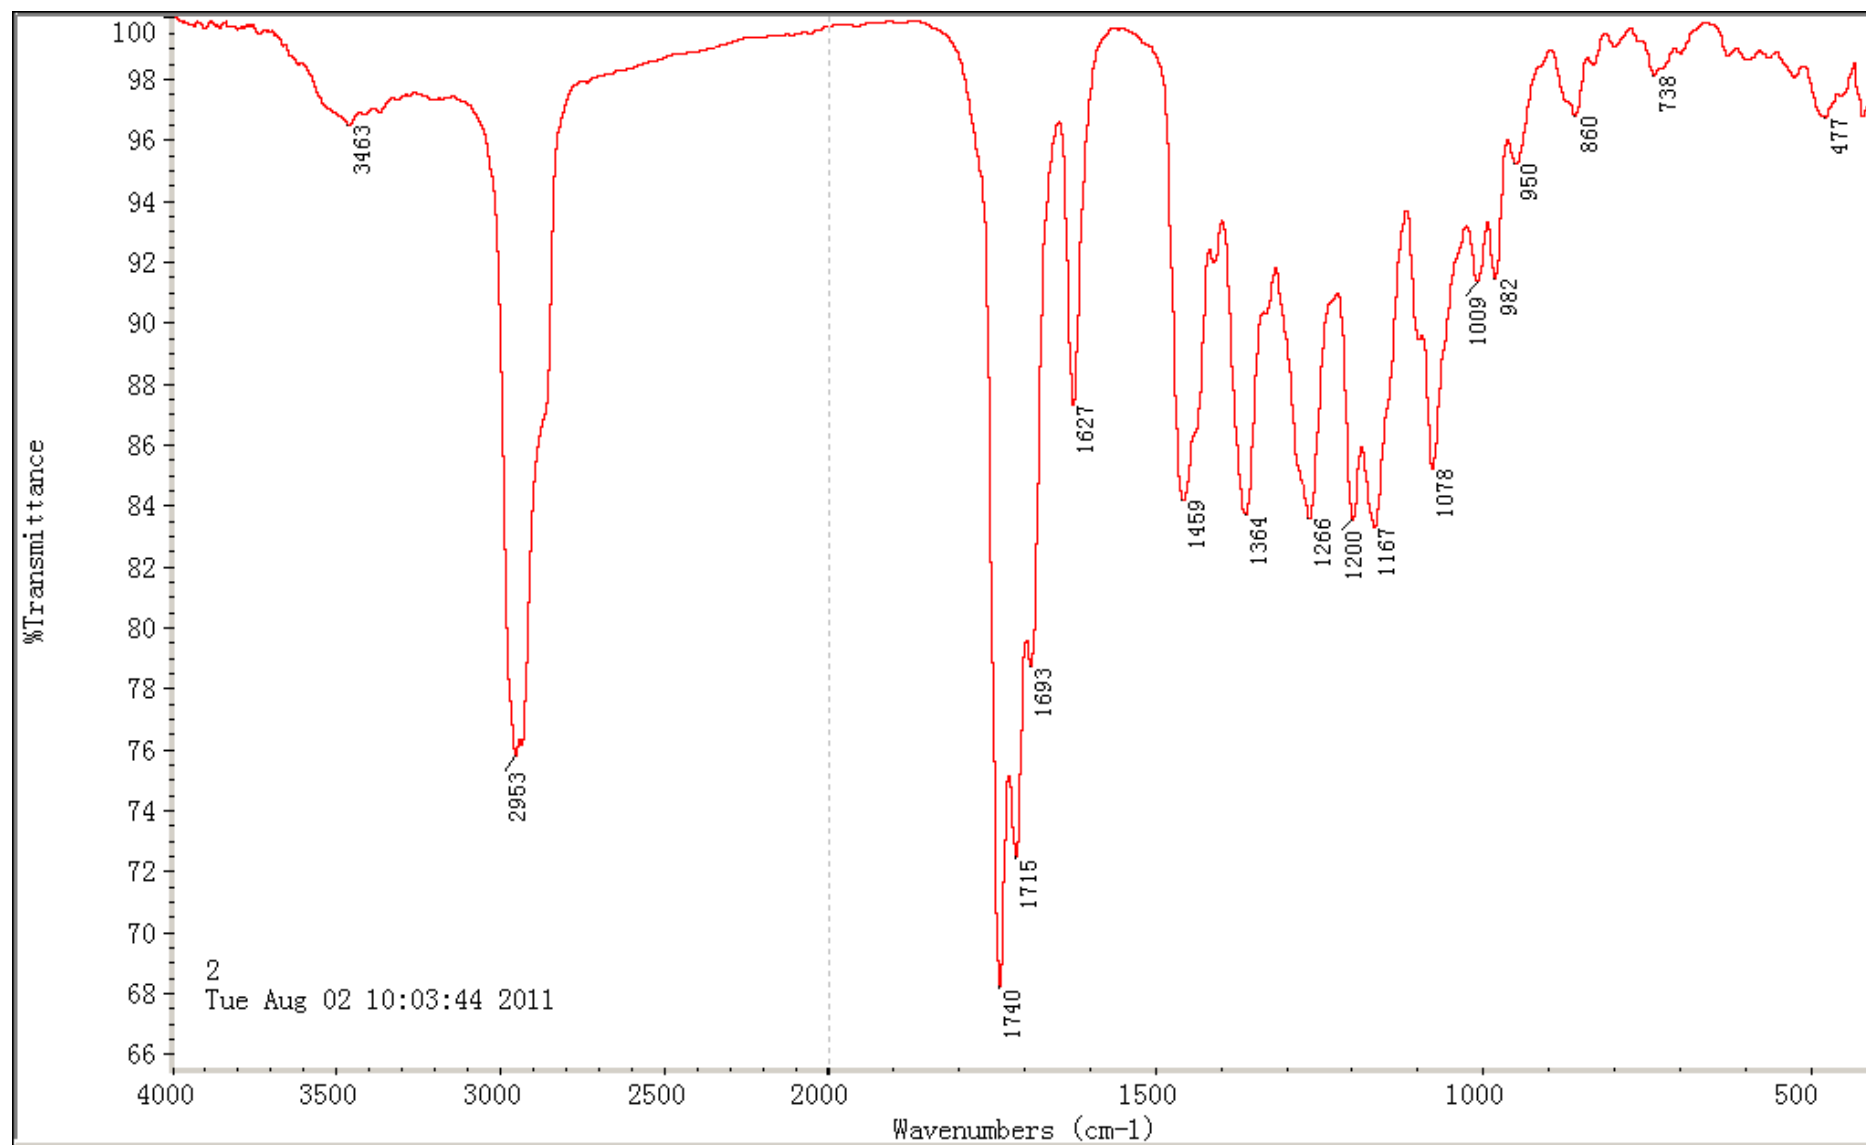

**Figure S3.**  $^1\text{H}$  NMR spectrum of diacarpoxide H (**1**) in  $\text{CDCl}_3$ .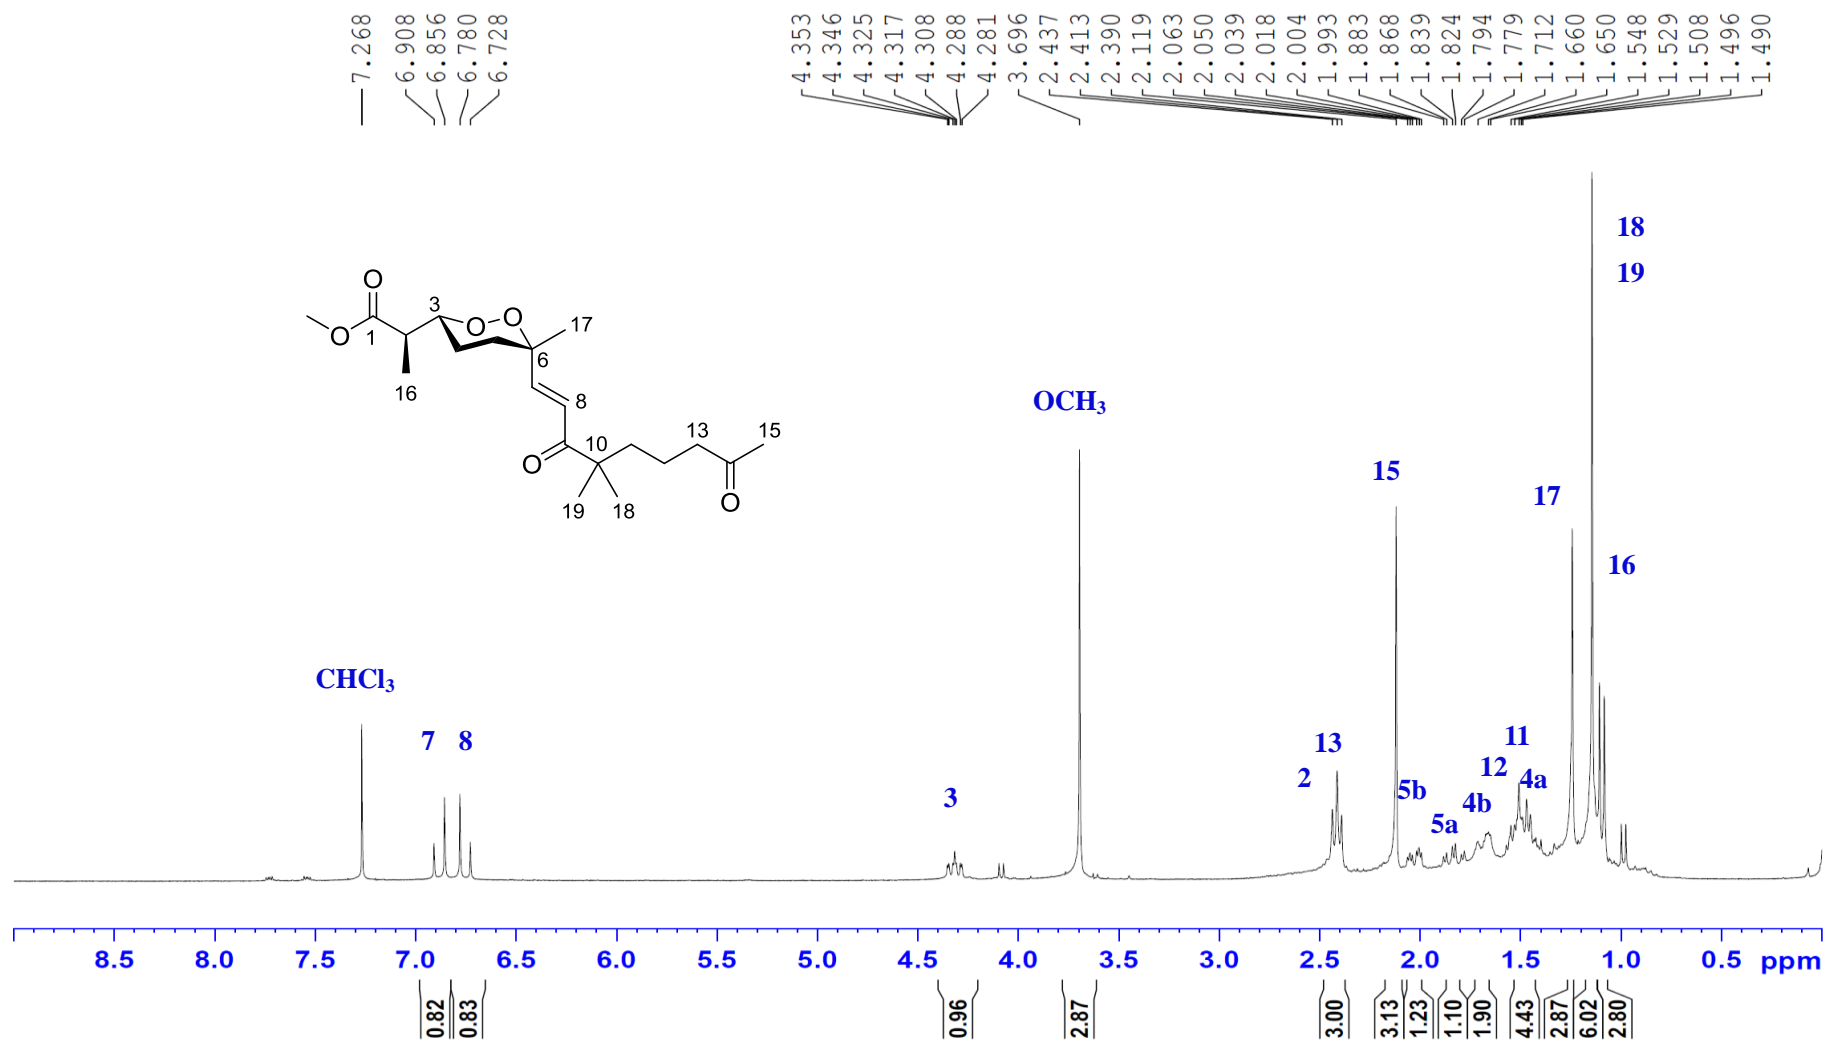

**Figure S4.**  $^{13}\text{C}$  NMR spectrum of diacarpoxide H (1) in  $\text{CDCl}_3$ .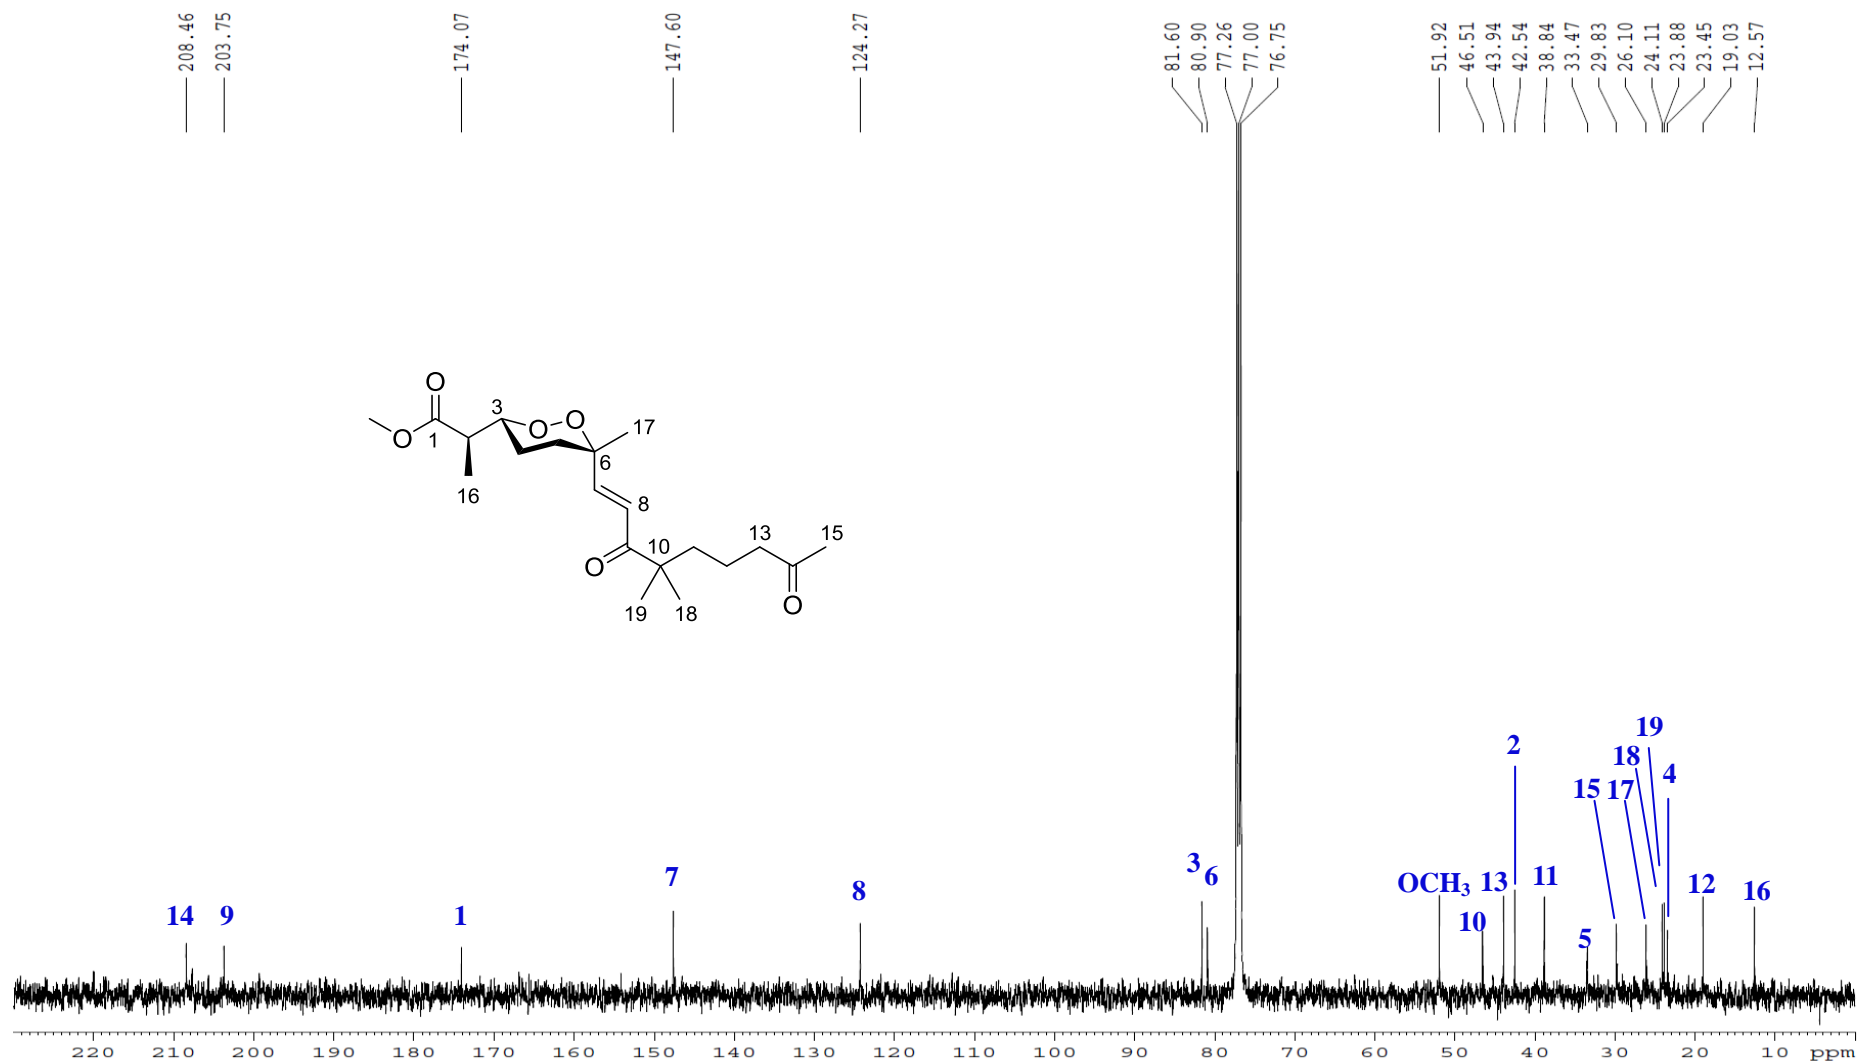

**Figure S5.**  $^1\text{H}$ - $^1\text{H}$  COSY spectrum of diacarpoxide H (1) in  $\text{CDCl}_3$ .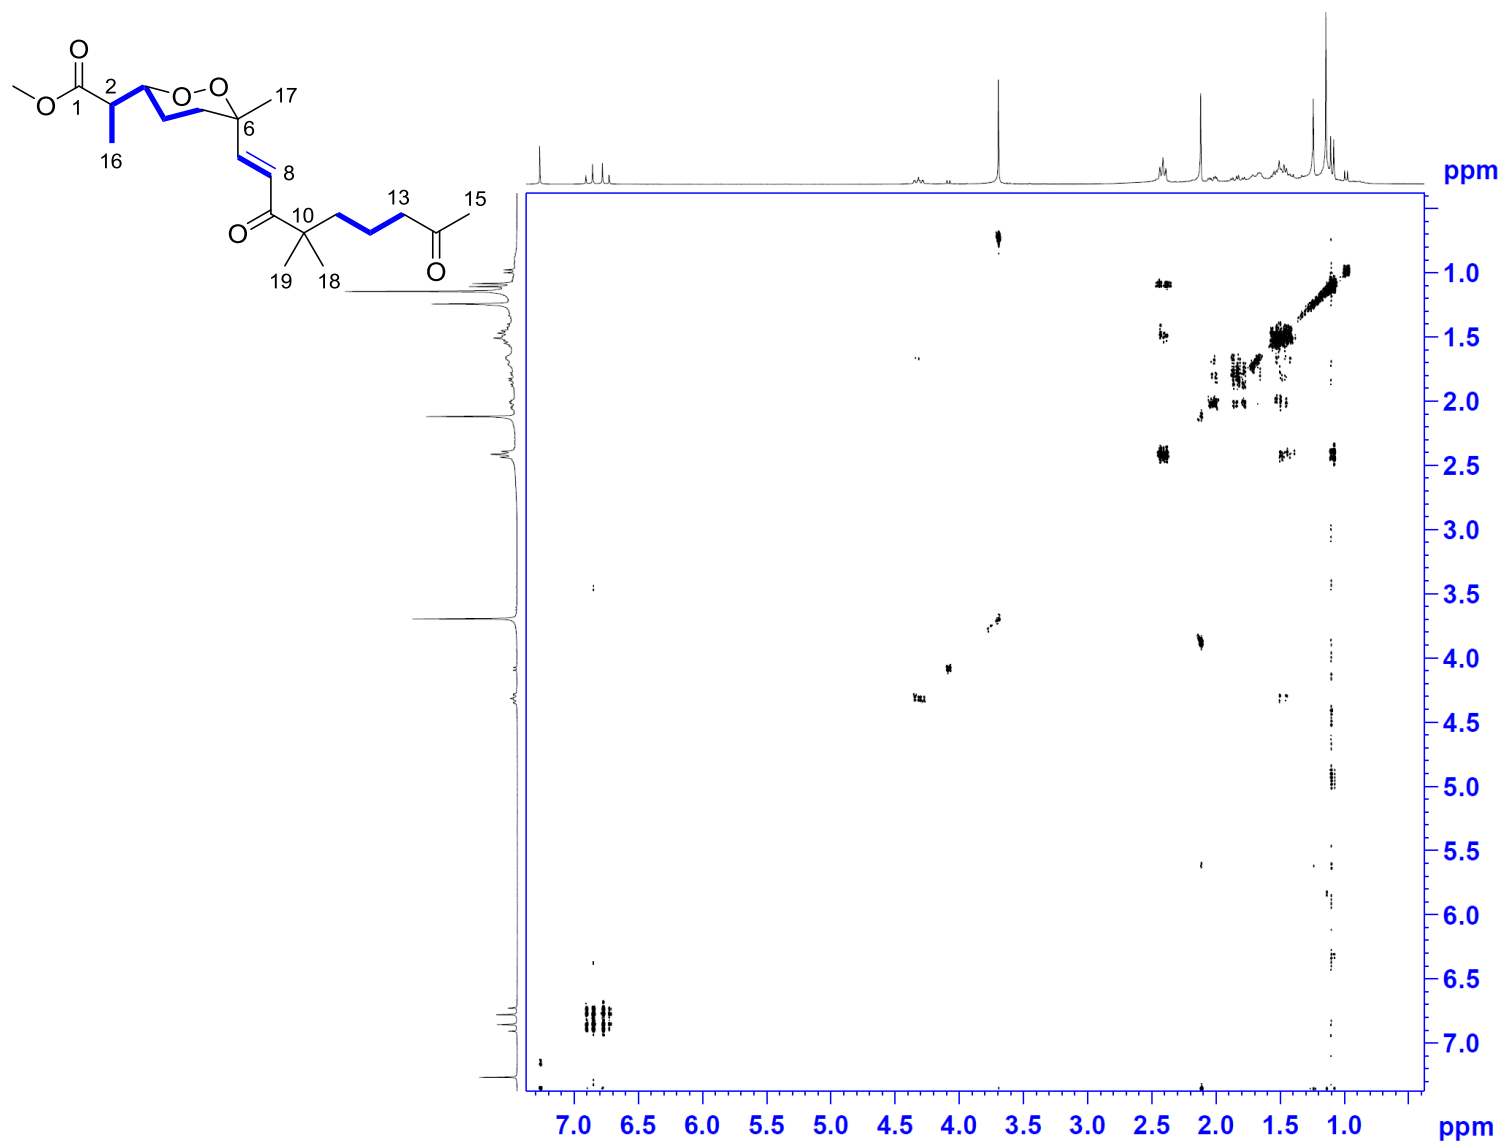

Figure S6. HSQC spectrum of diacarpoxide H (1) in CDCl<sub>3</sub>.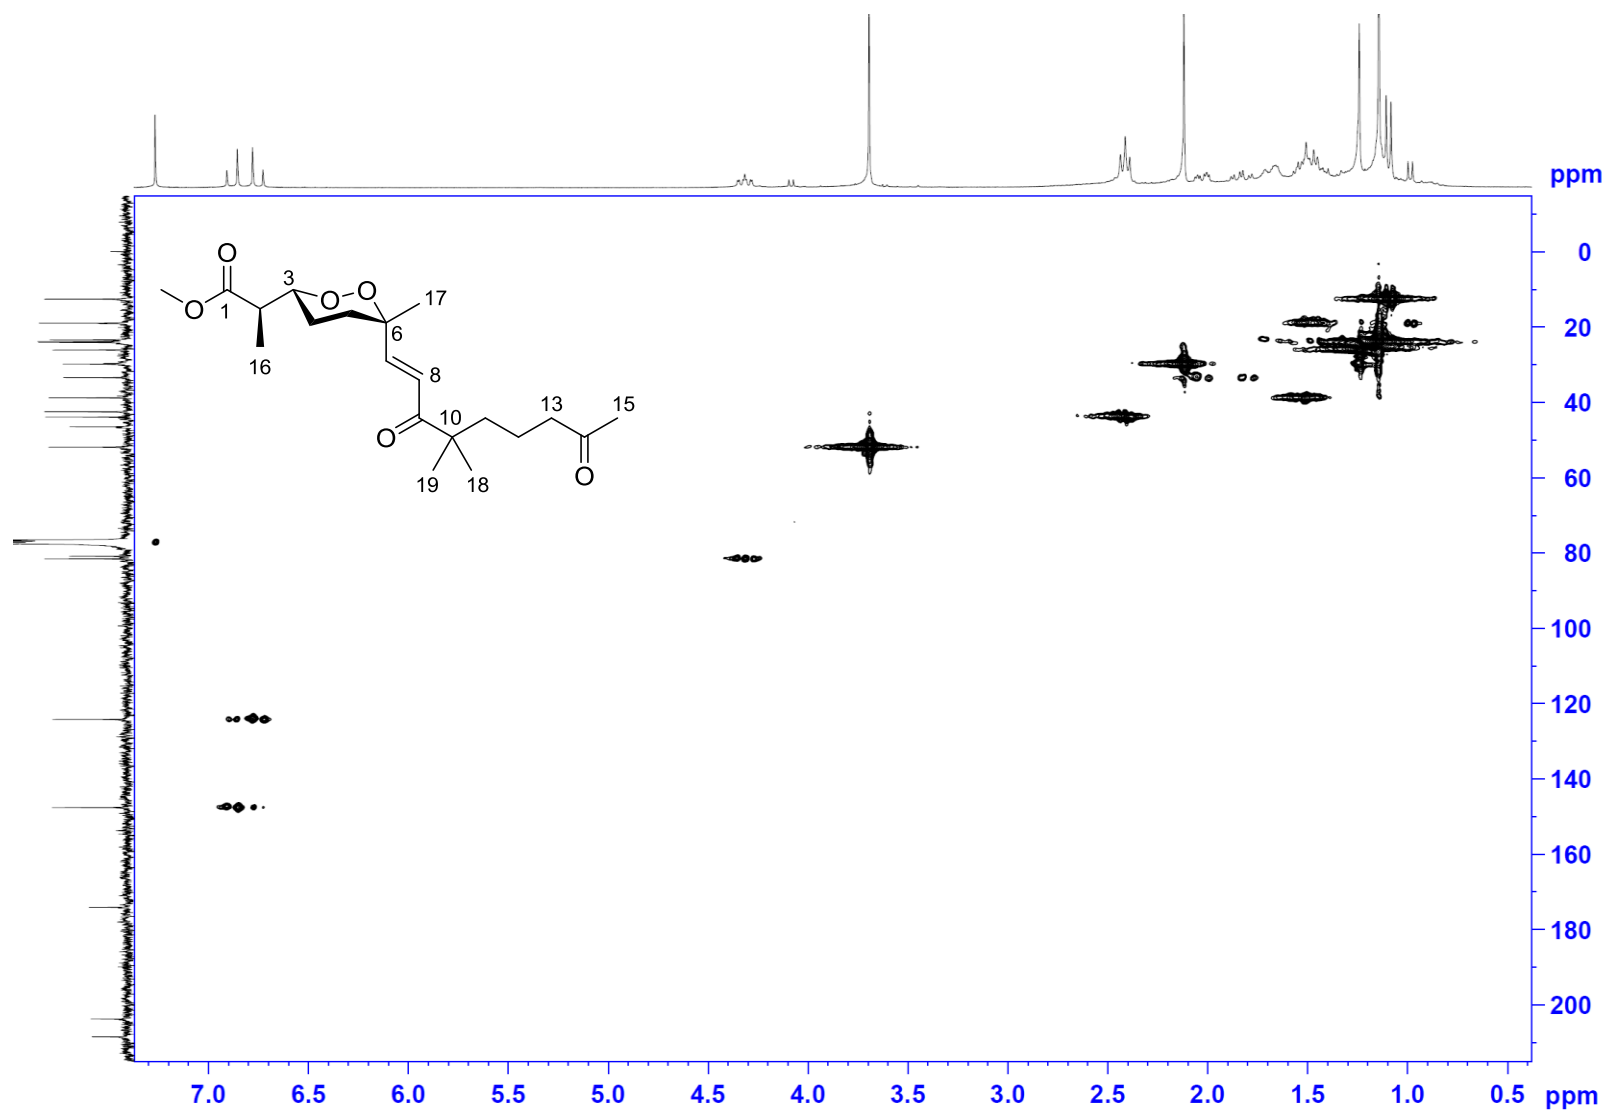



Figure S7. HMBC spectrum of diacarpoxide H (1) in CDCl<sub>3</sub>.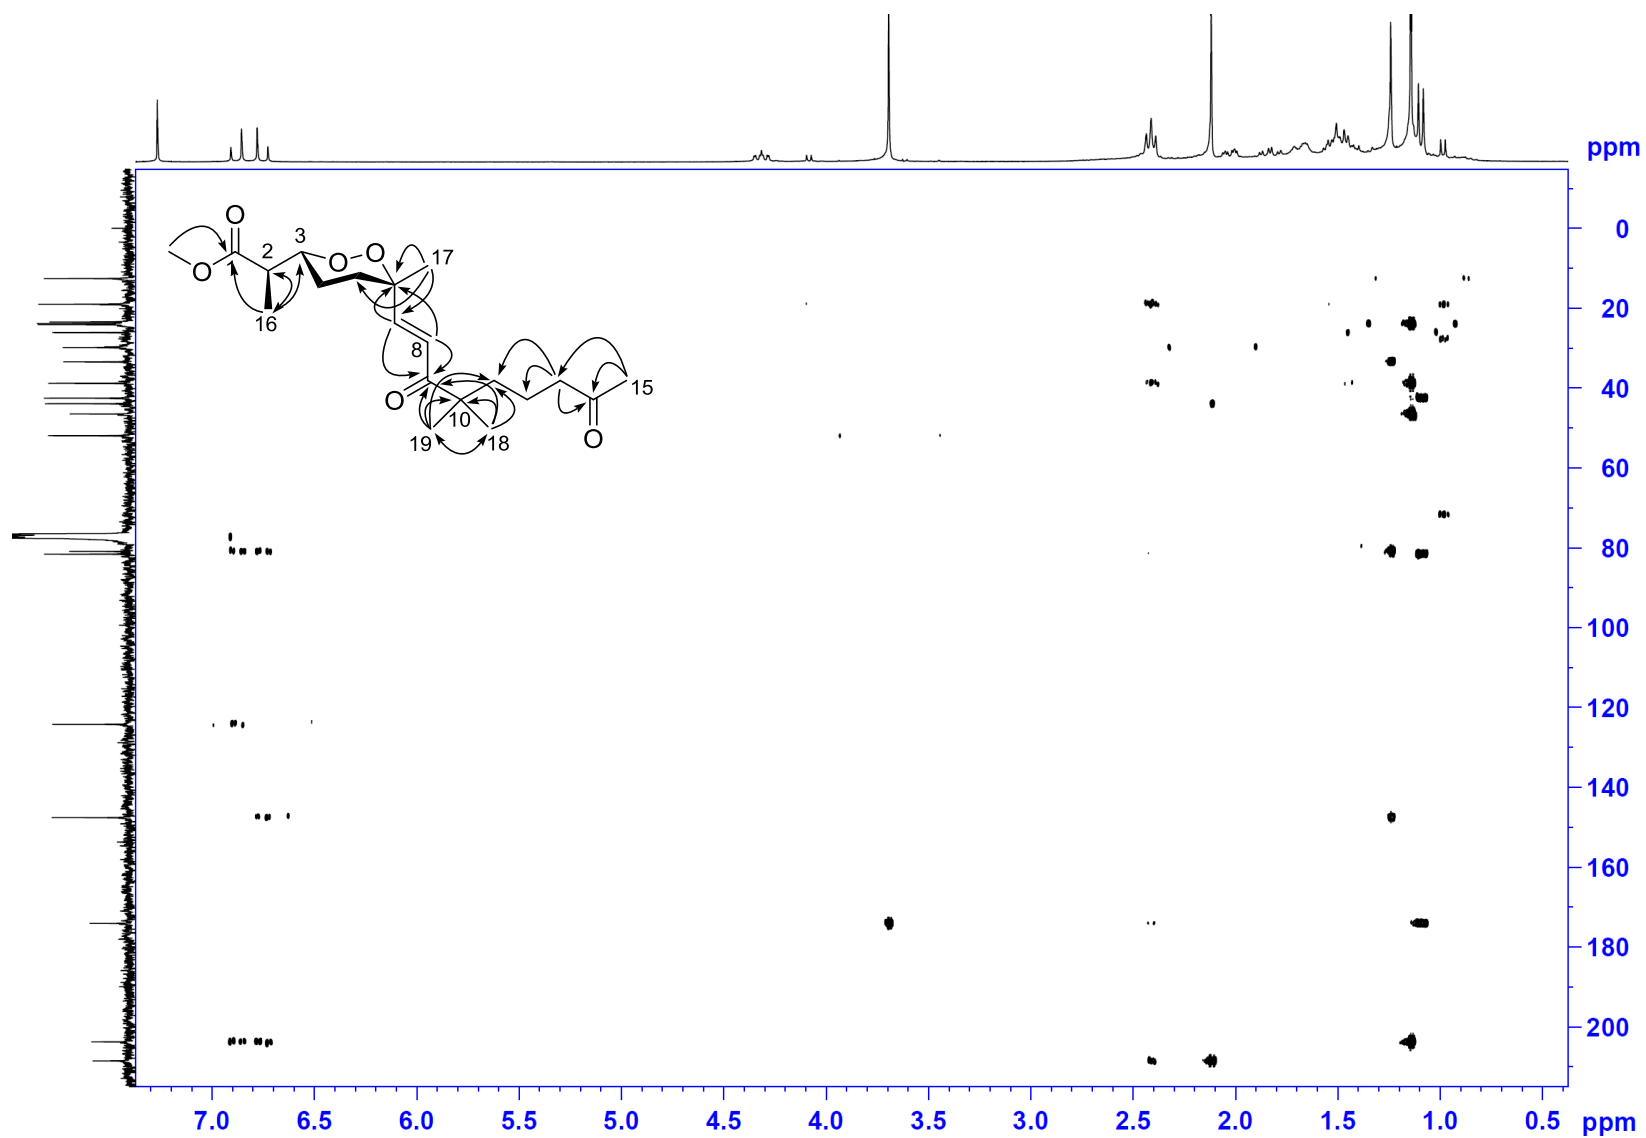

**Figure S8.** NOESY spectrum of diacarpoxide H (**1**) in CDCl<sub>3</sub>.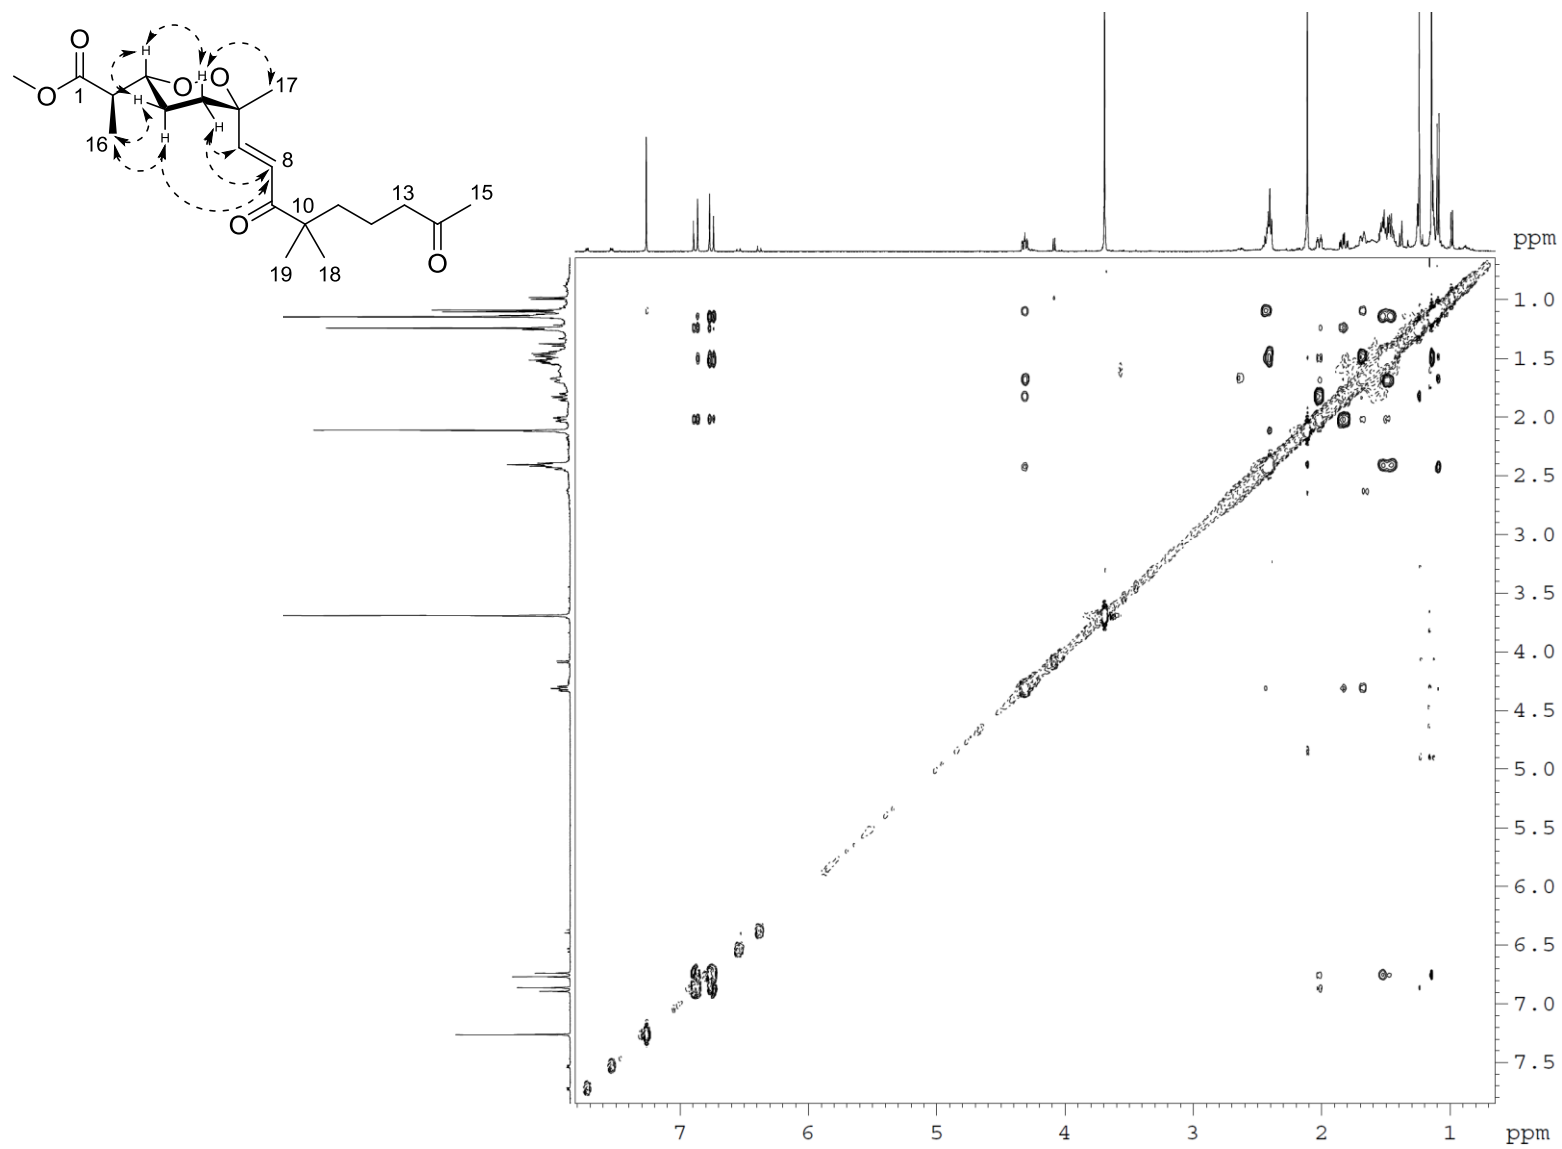

**Figure S9.** High resolution ESI mass spectrum of diacarperoxide I (2).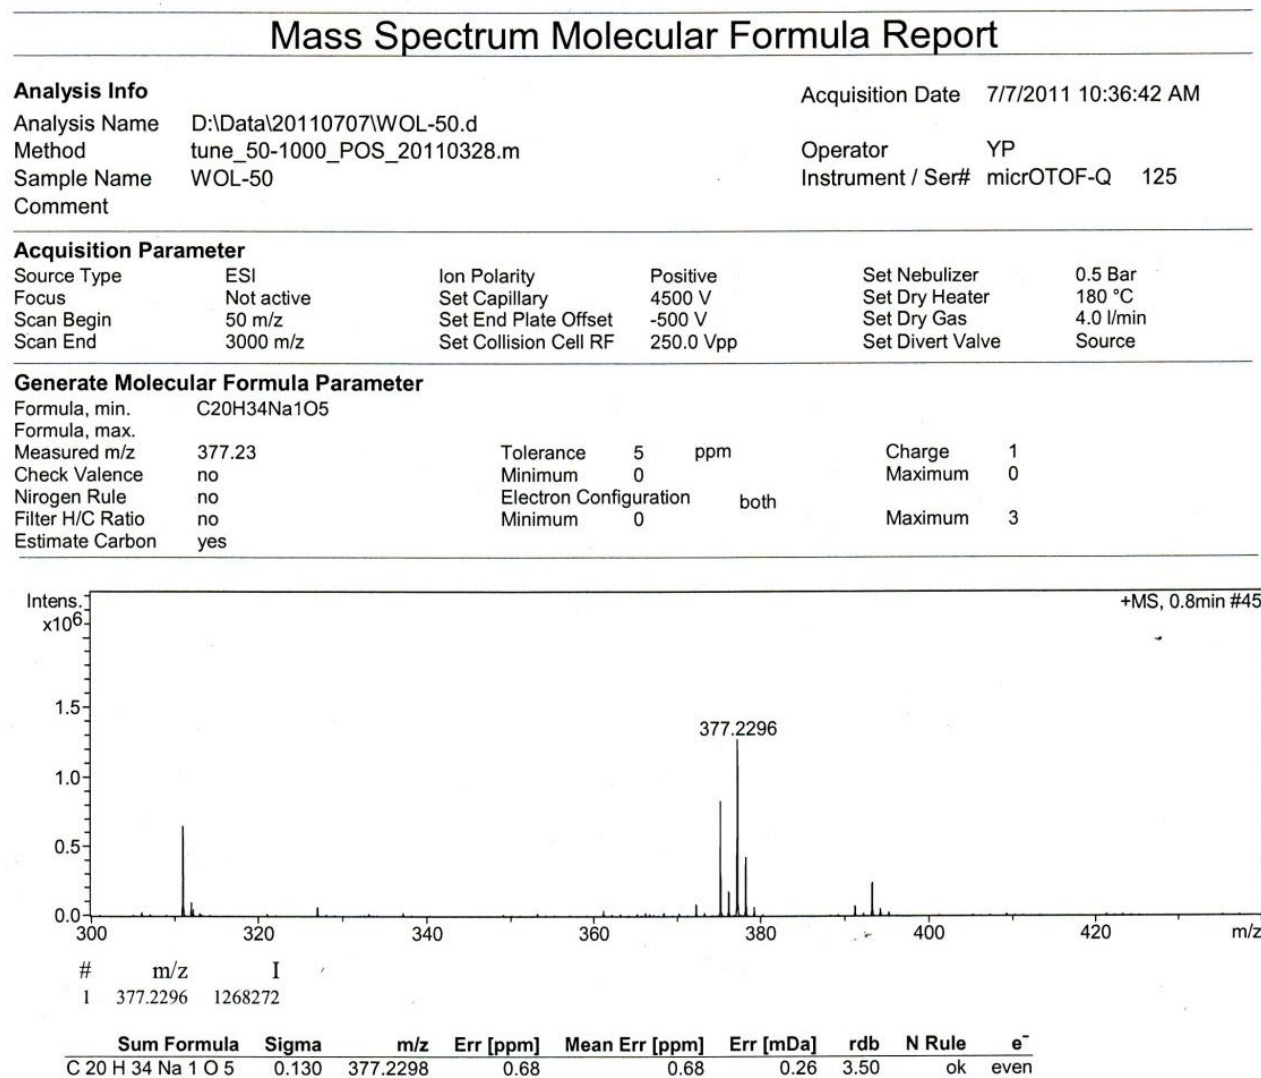

Figure S10. IR spectrum of diacarpoxide I (2).

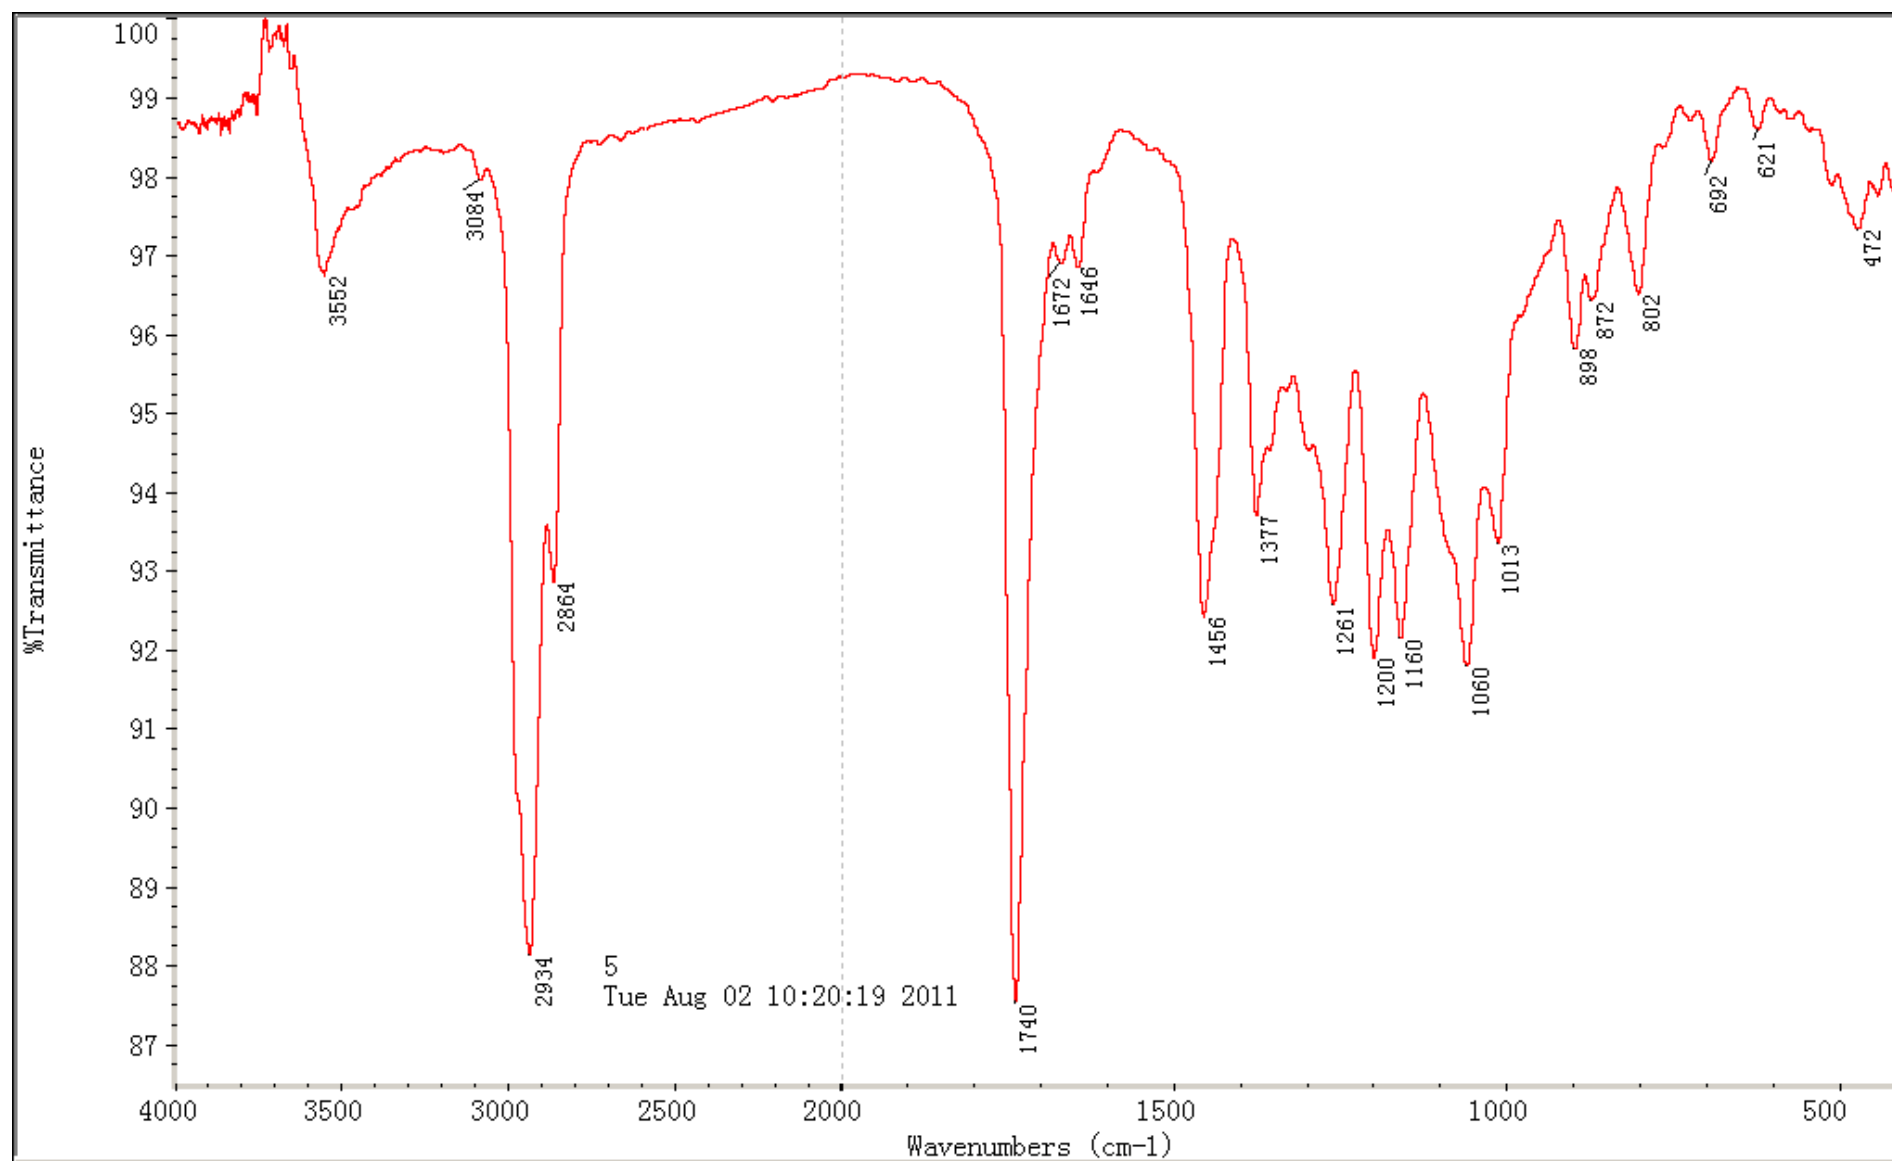

**Figure S11.**  $^1\text{H}$  NMR spectrum of diacarpoxide I (**2**) in  $\text{CDCl}_3$ .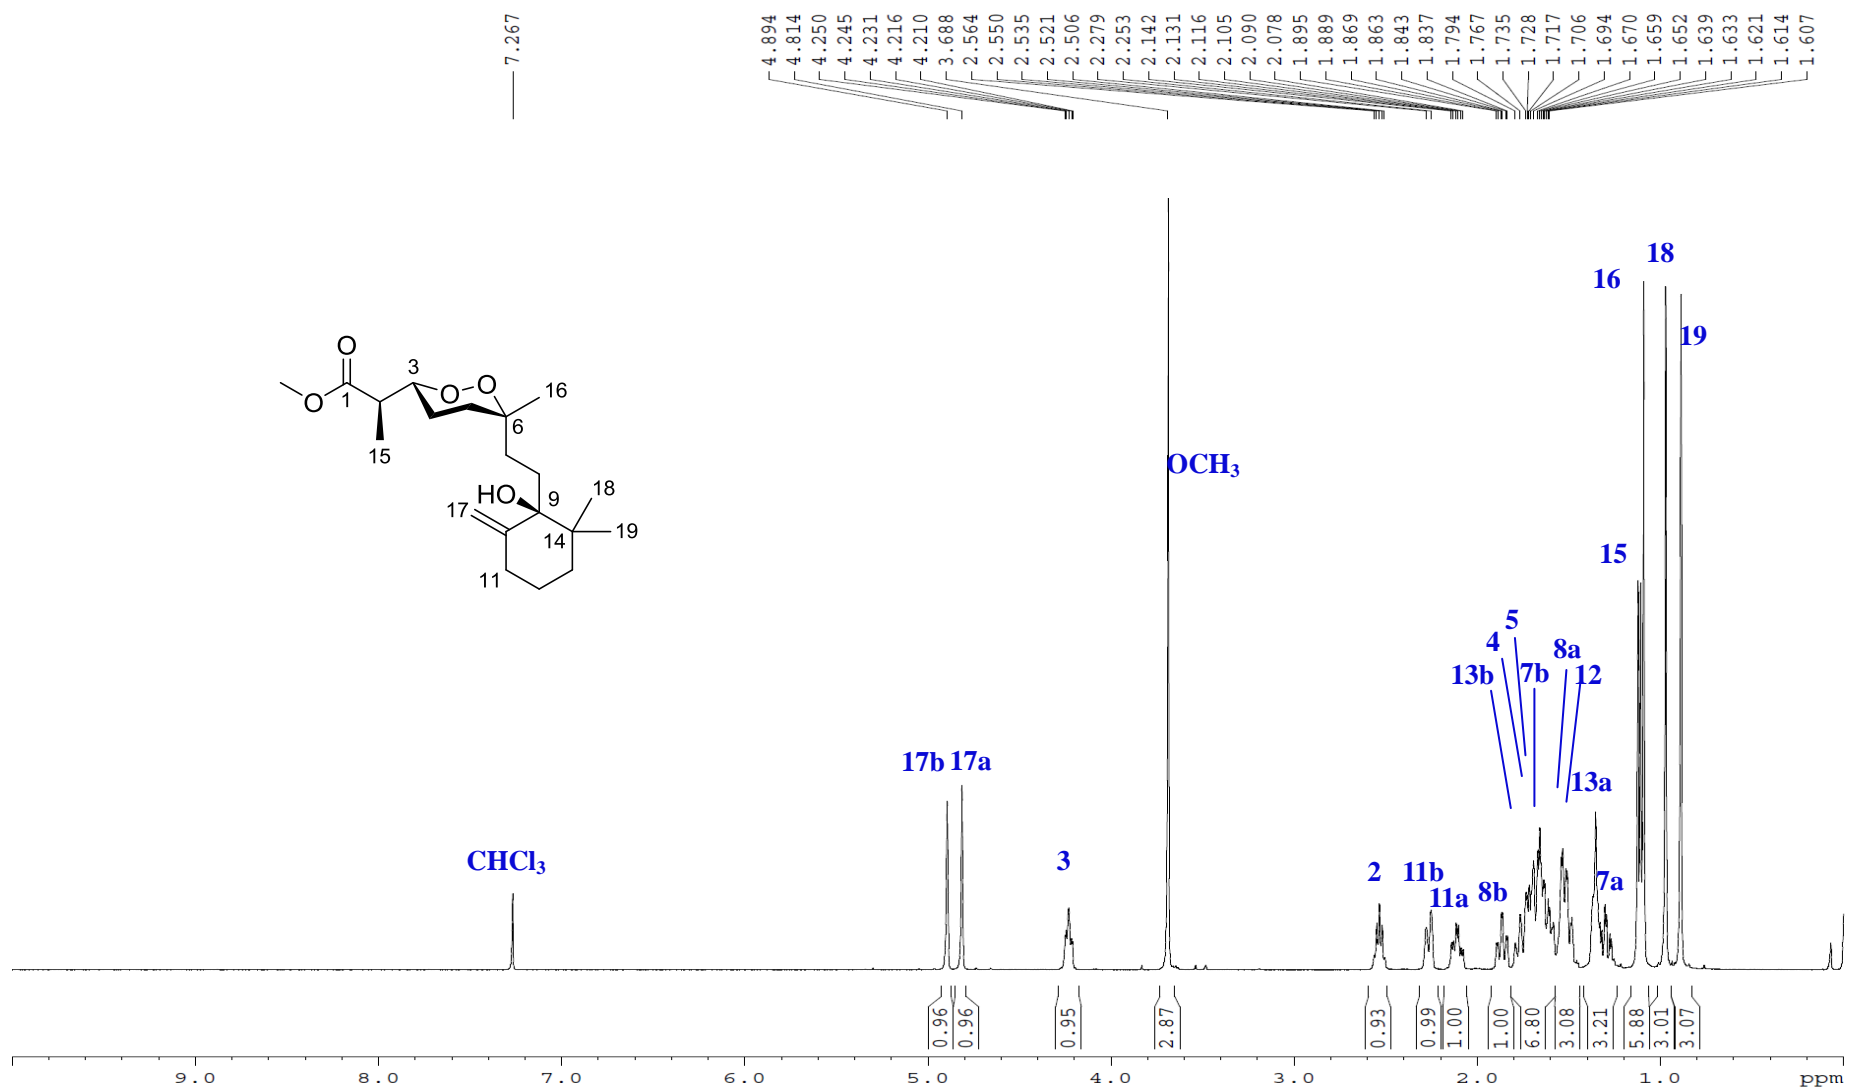

**Figure S12.**  $^{13}\text{C}$  NMR spectrum of diacarpoxide I (2) in  $\text{CDCl}_3$ .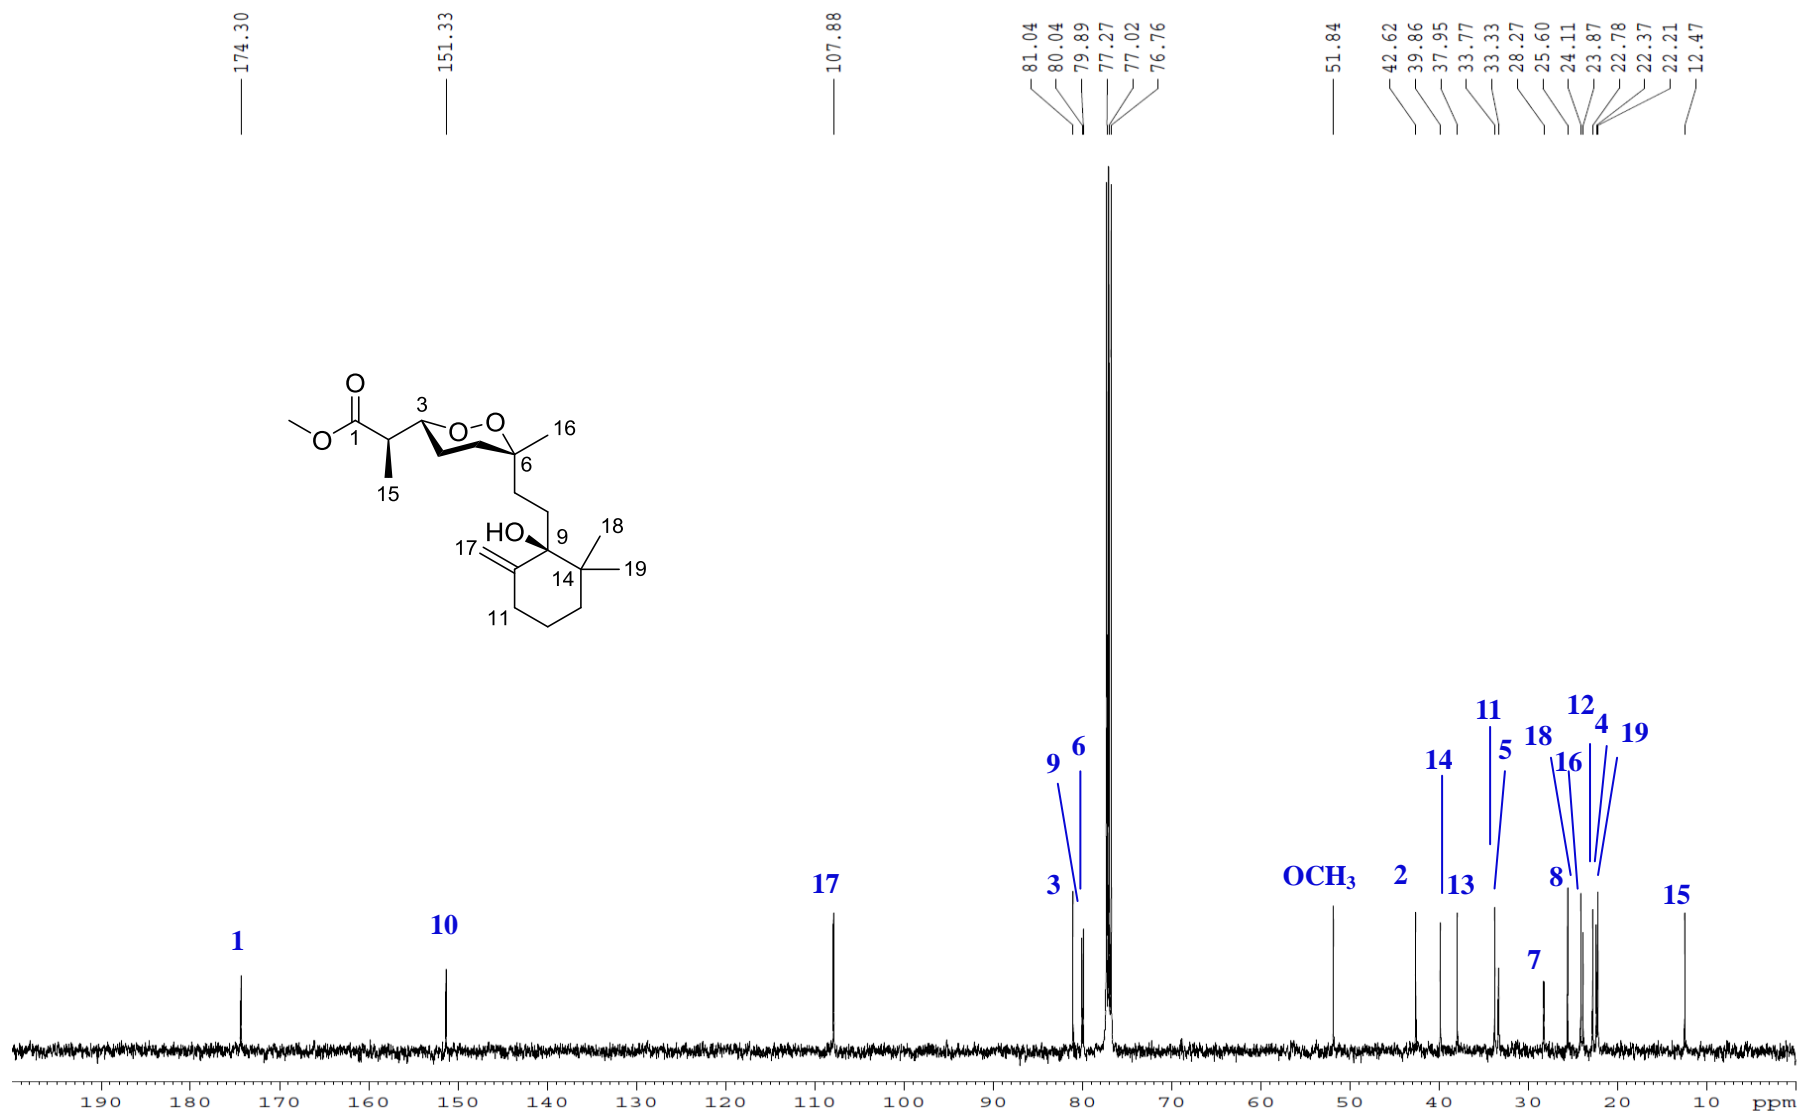

**Figure S13.**  $^1\text{H}$ - $^1\text{H}$  COSY spectrum of diacarpoxide I (2) in  $\text{CDCl}_3$ .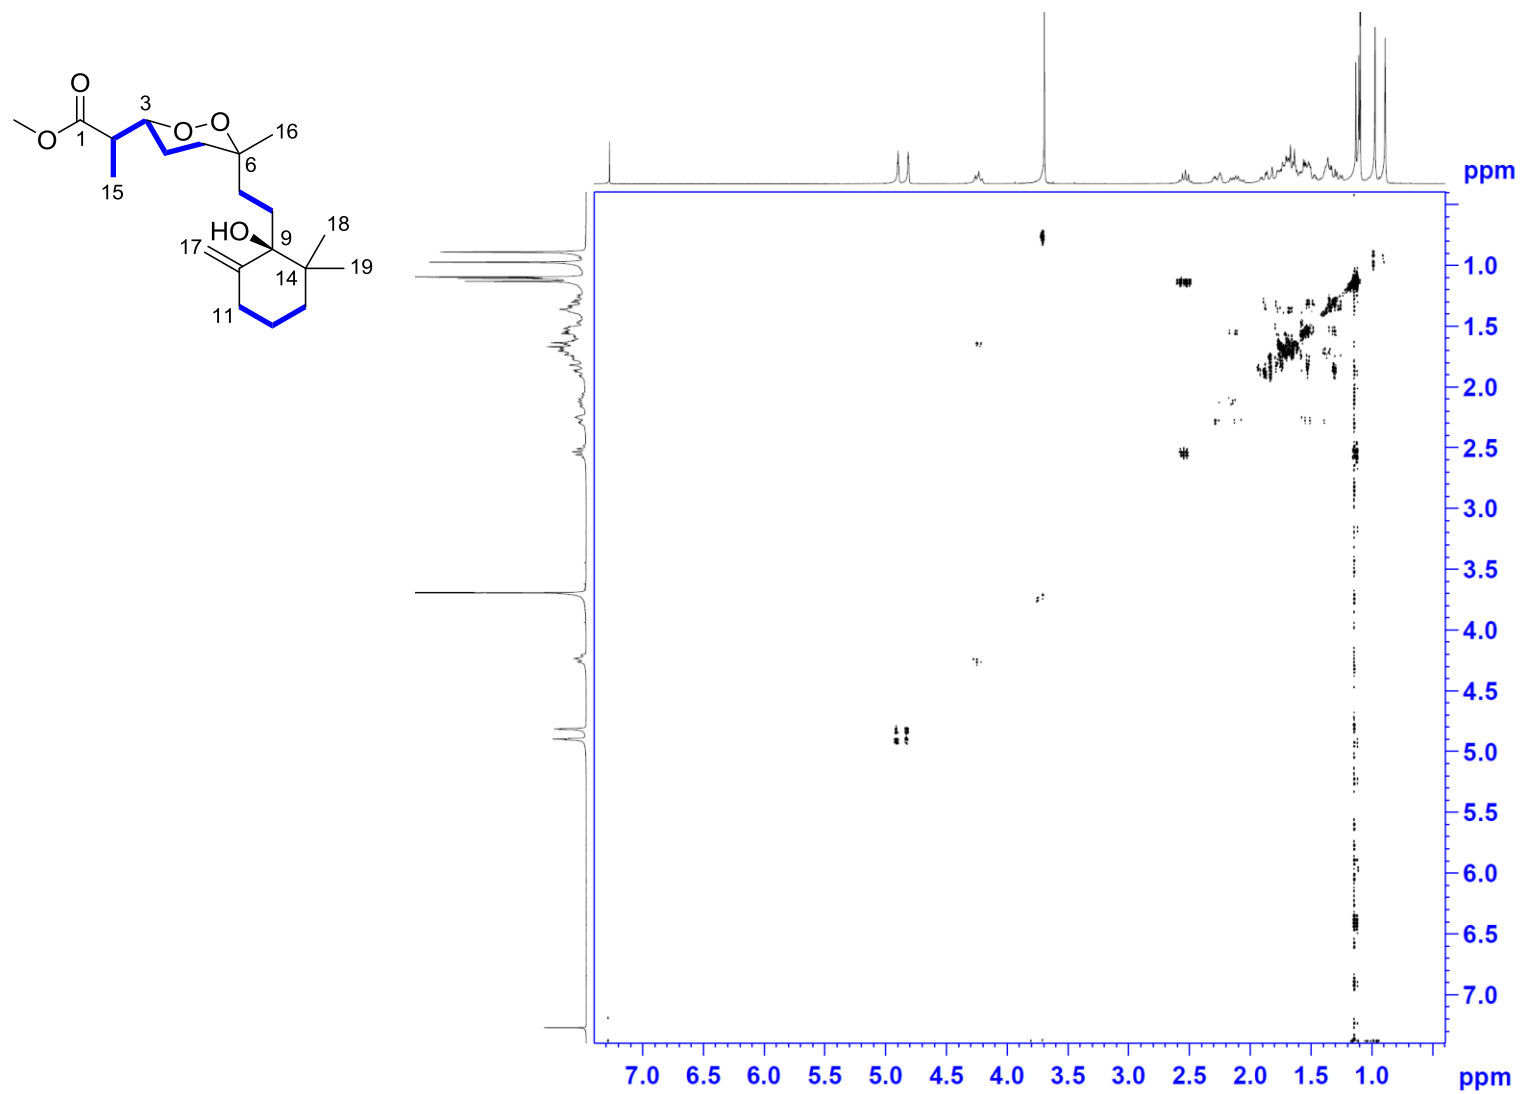

Figure S14. HSQC spectrum of diacarpoxide I (2) in CDCl<sub>3</sub>.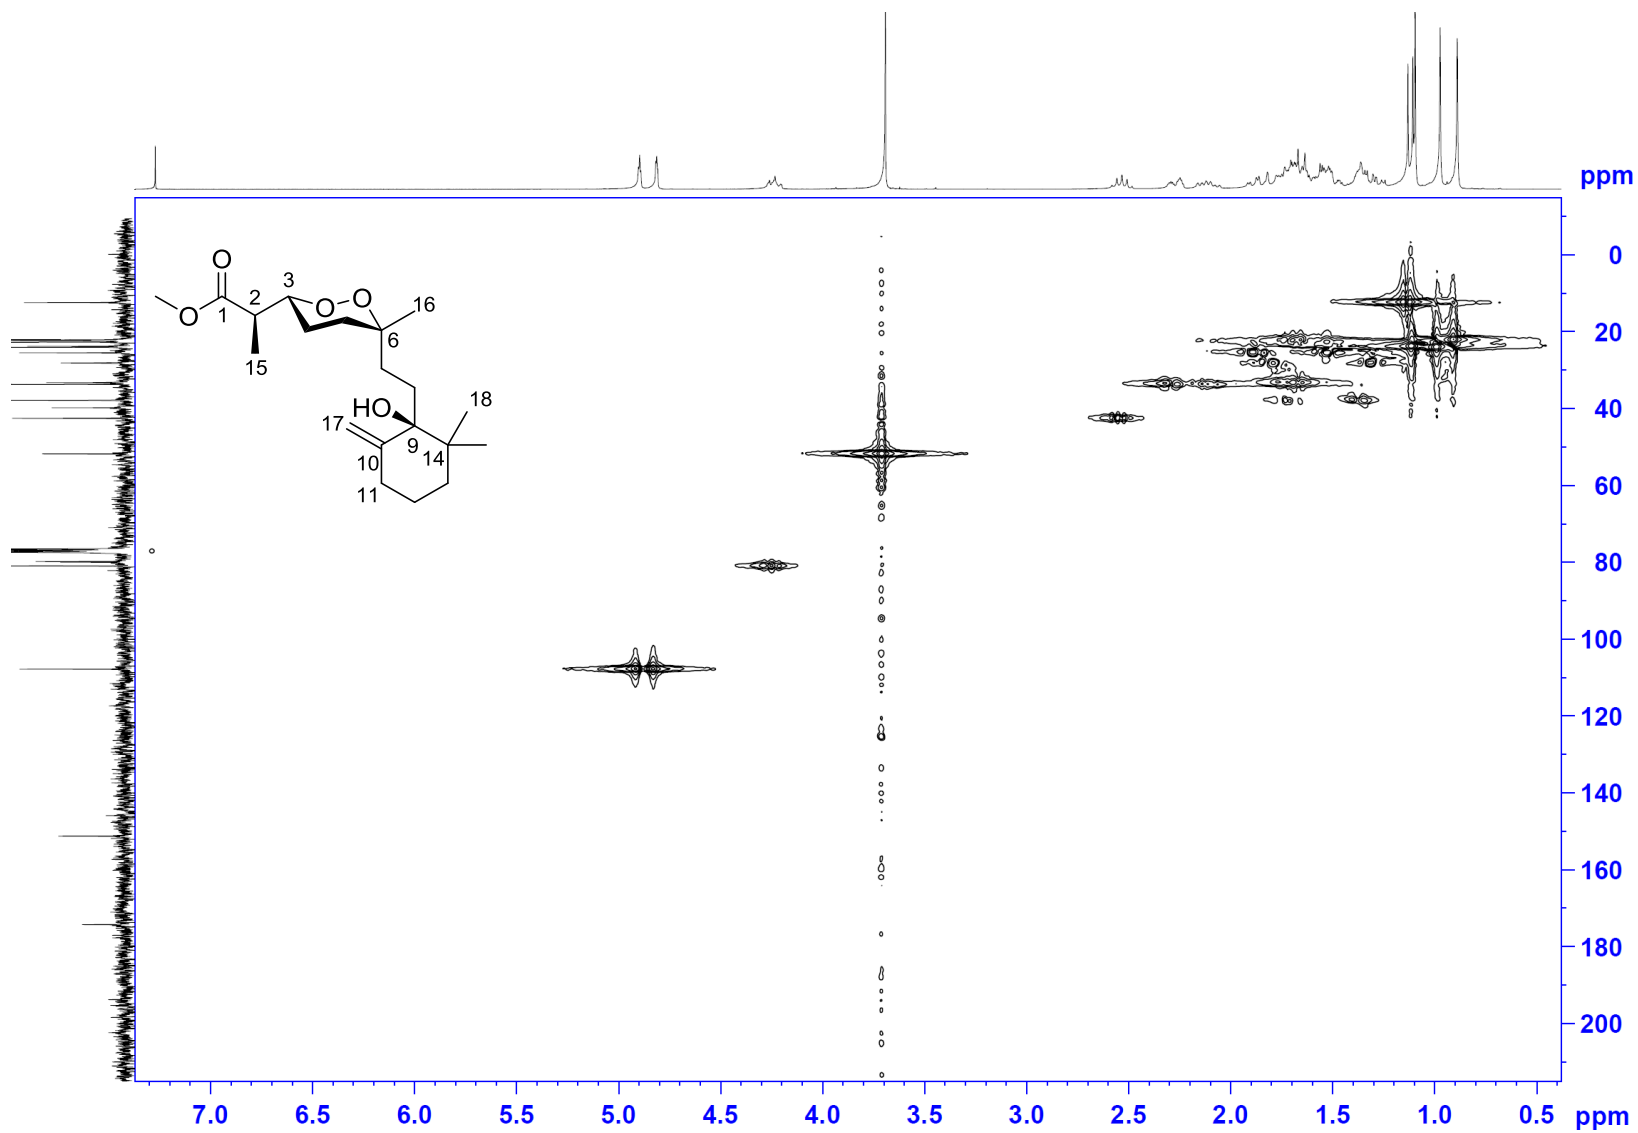



Figure S15. HMBC spectrum of diacarpoxide I (2) in  $\text{CDCl}_3$ .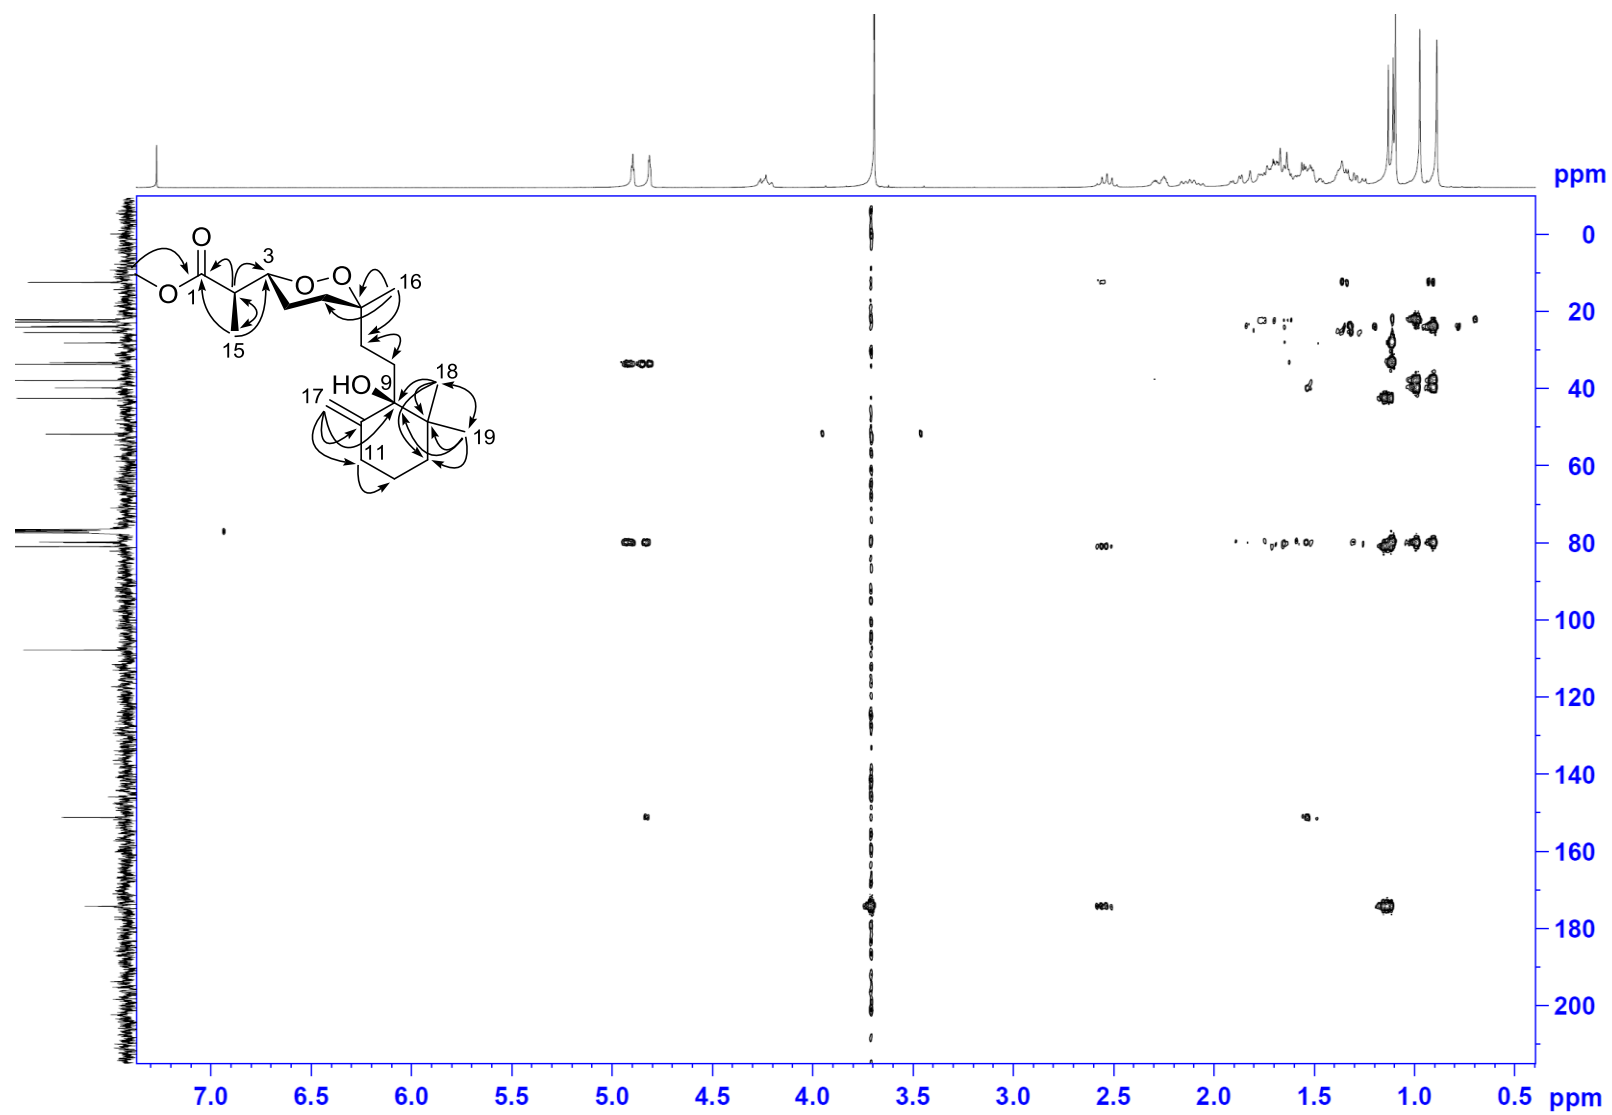

**Figure S16.** NOESY spectrum of diacarpoxide I (2) in DMSO.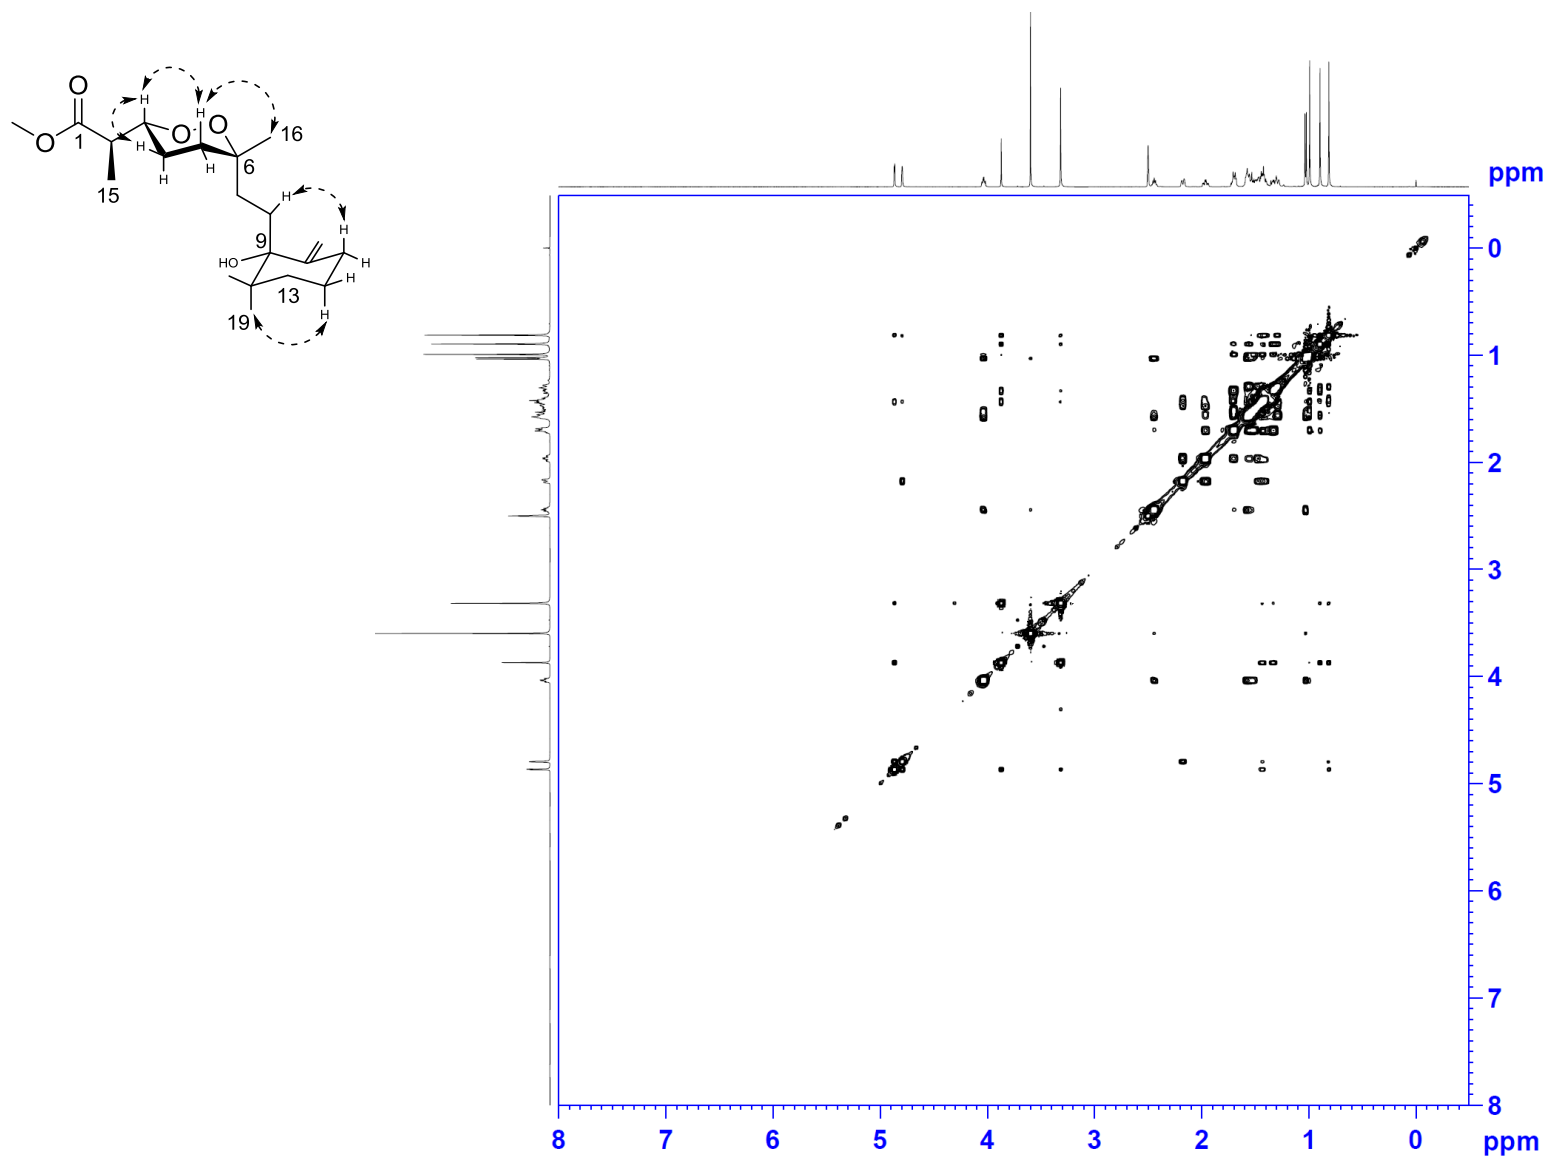

Figure S17. High resolution ESI mass spectrum of diacarperoxide J (3).

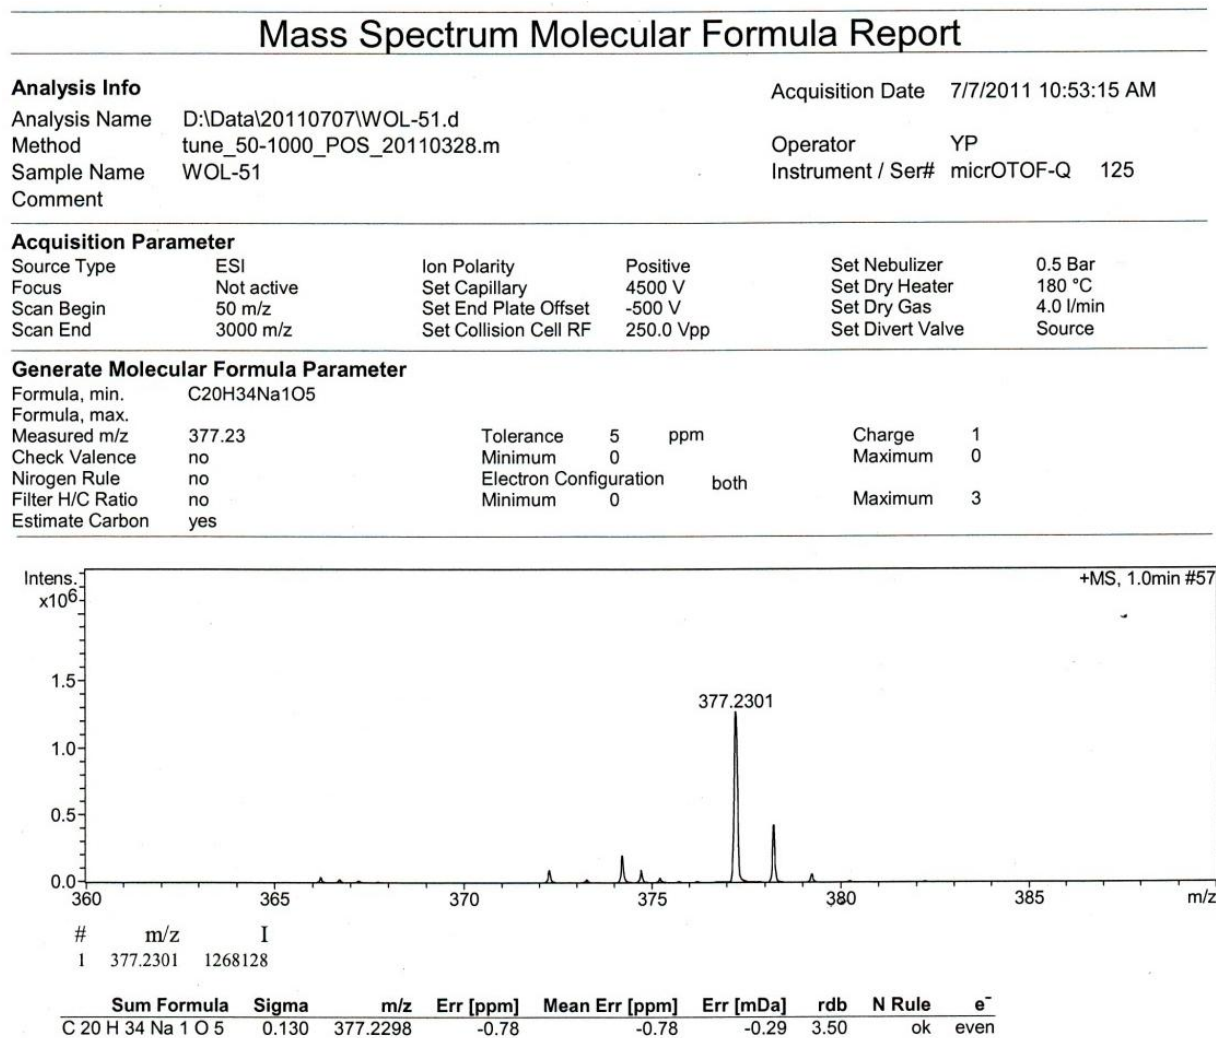

Figure S18. IR spectrum of diacarpoxide J (3).

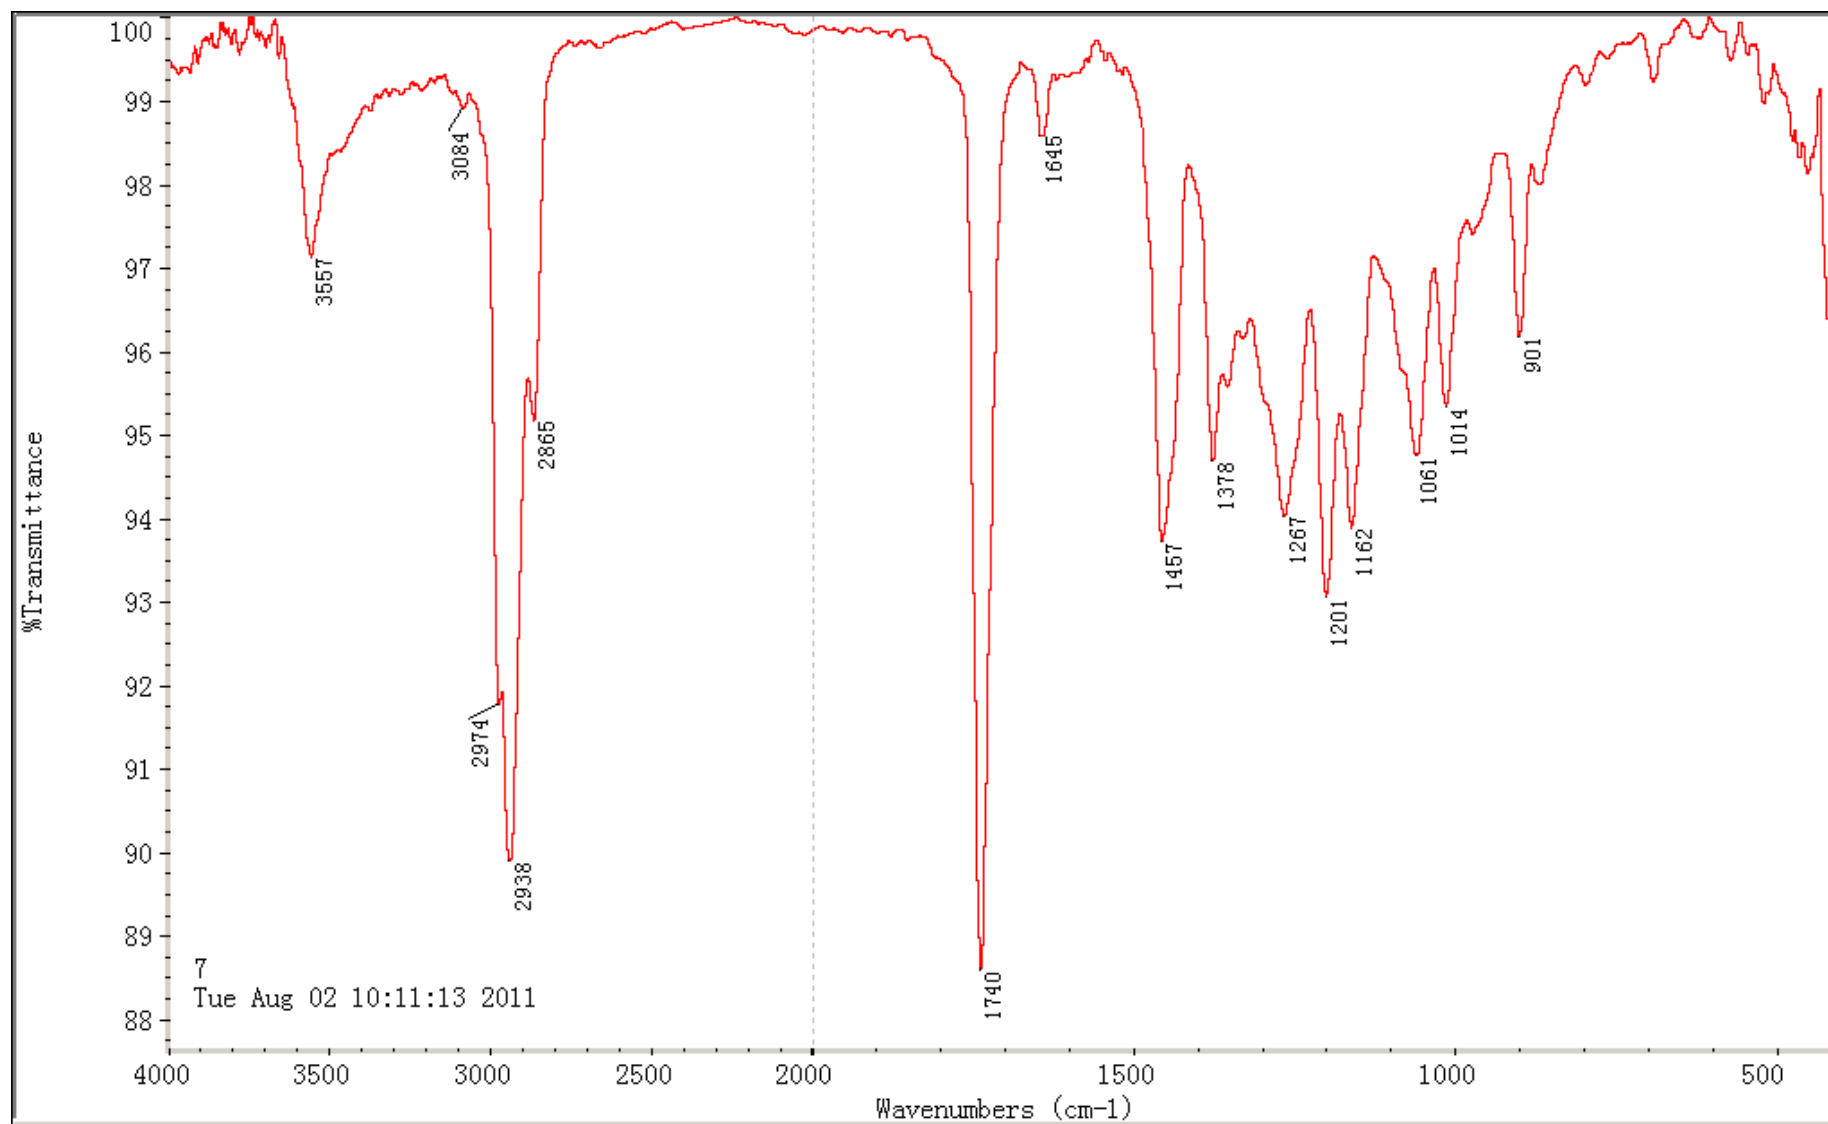

Figure S19.  $^1\text{H}$  NMR spectrum of diacarpoxide J (3) in  $\text{CDCl}_3$ .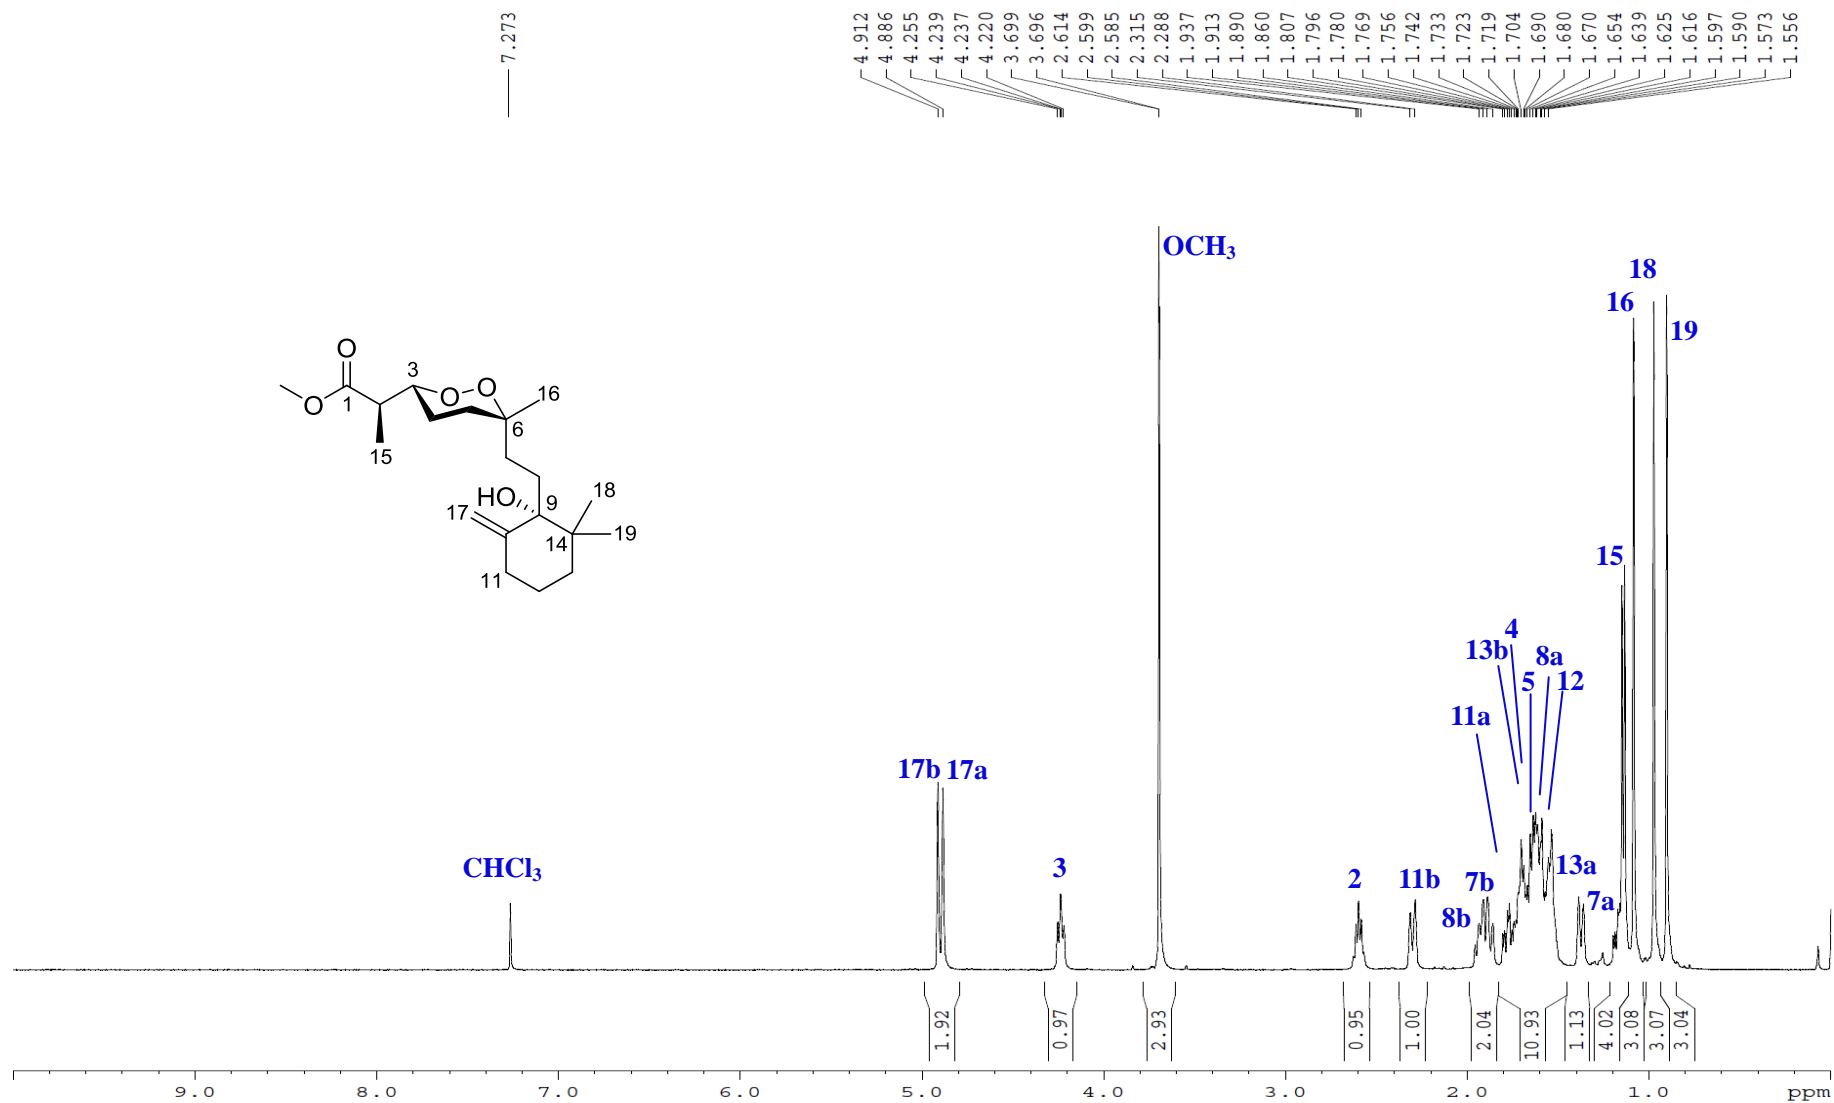

Figure S20.  $^{13}\text{C}$  NMR spectrum of diacarperoxide J (3) in  $\text{CDCl}_3$ .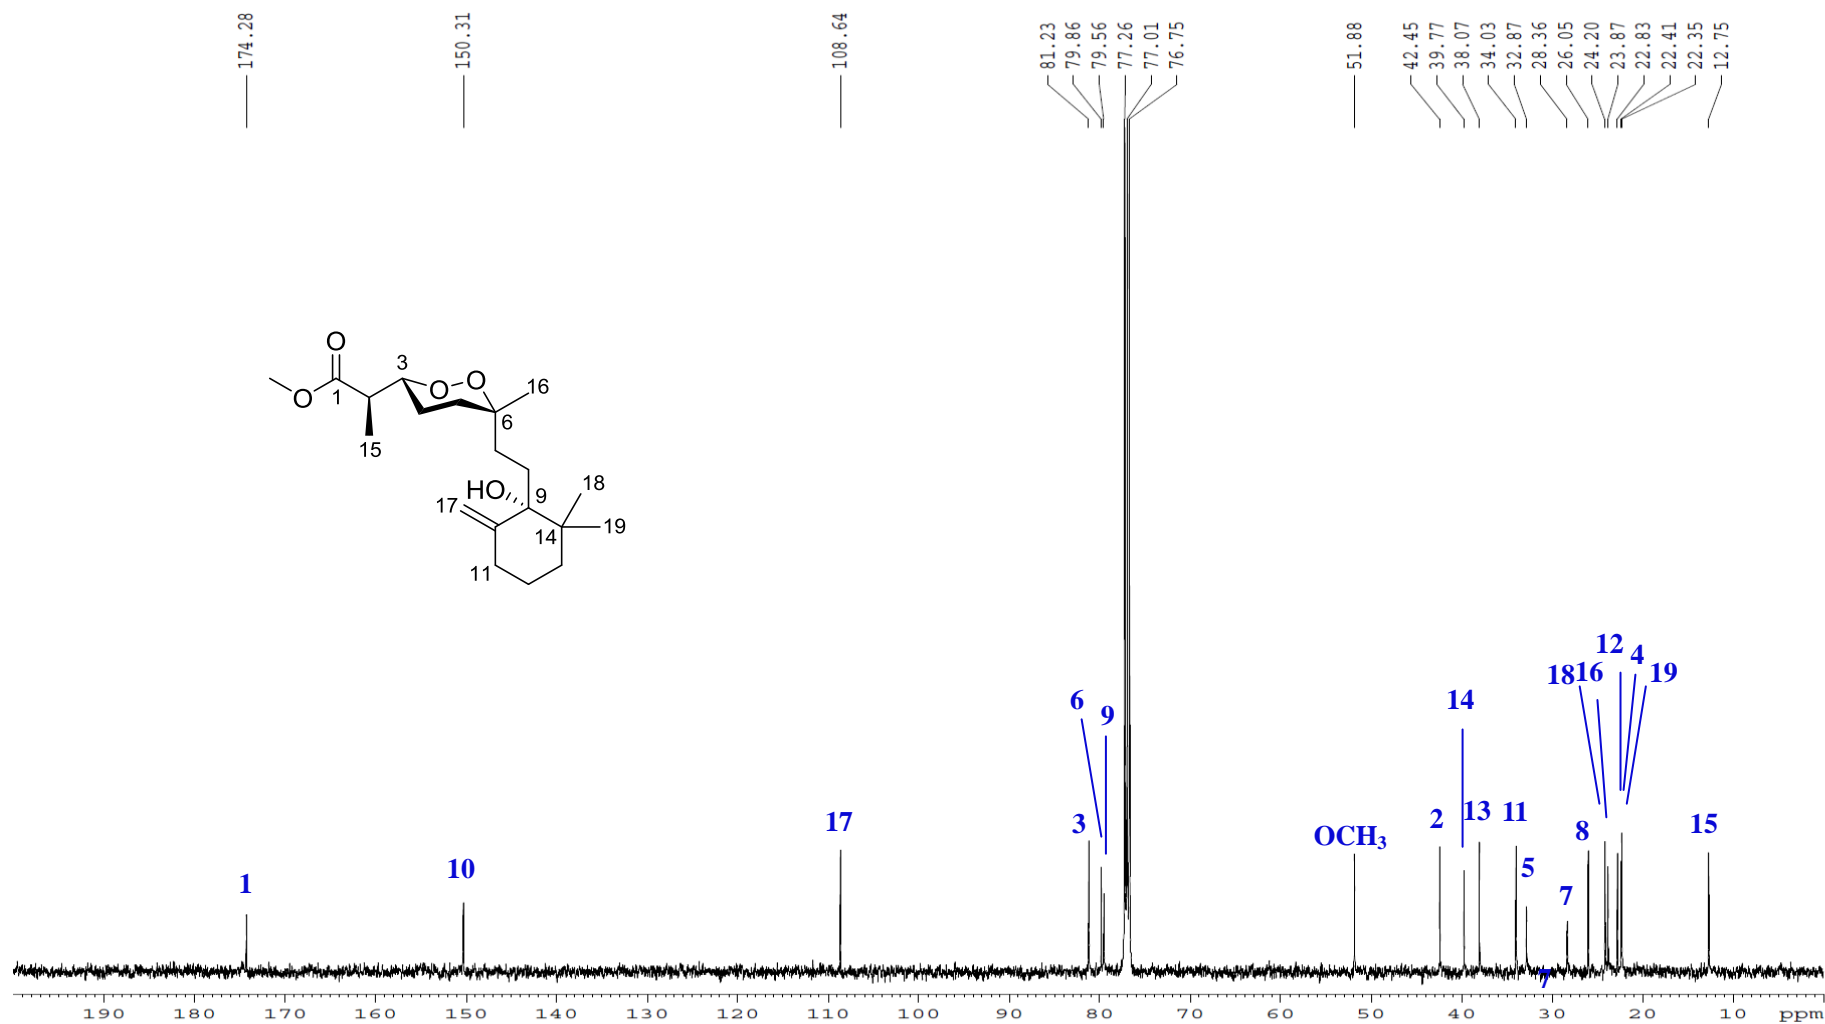

**Figure S21.**  $^1\text{H}$ - $^1\text{H}$  COSY spectrum of diacarperoxide J (3) in  $\text{CDCl}_3$ .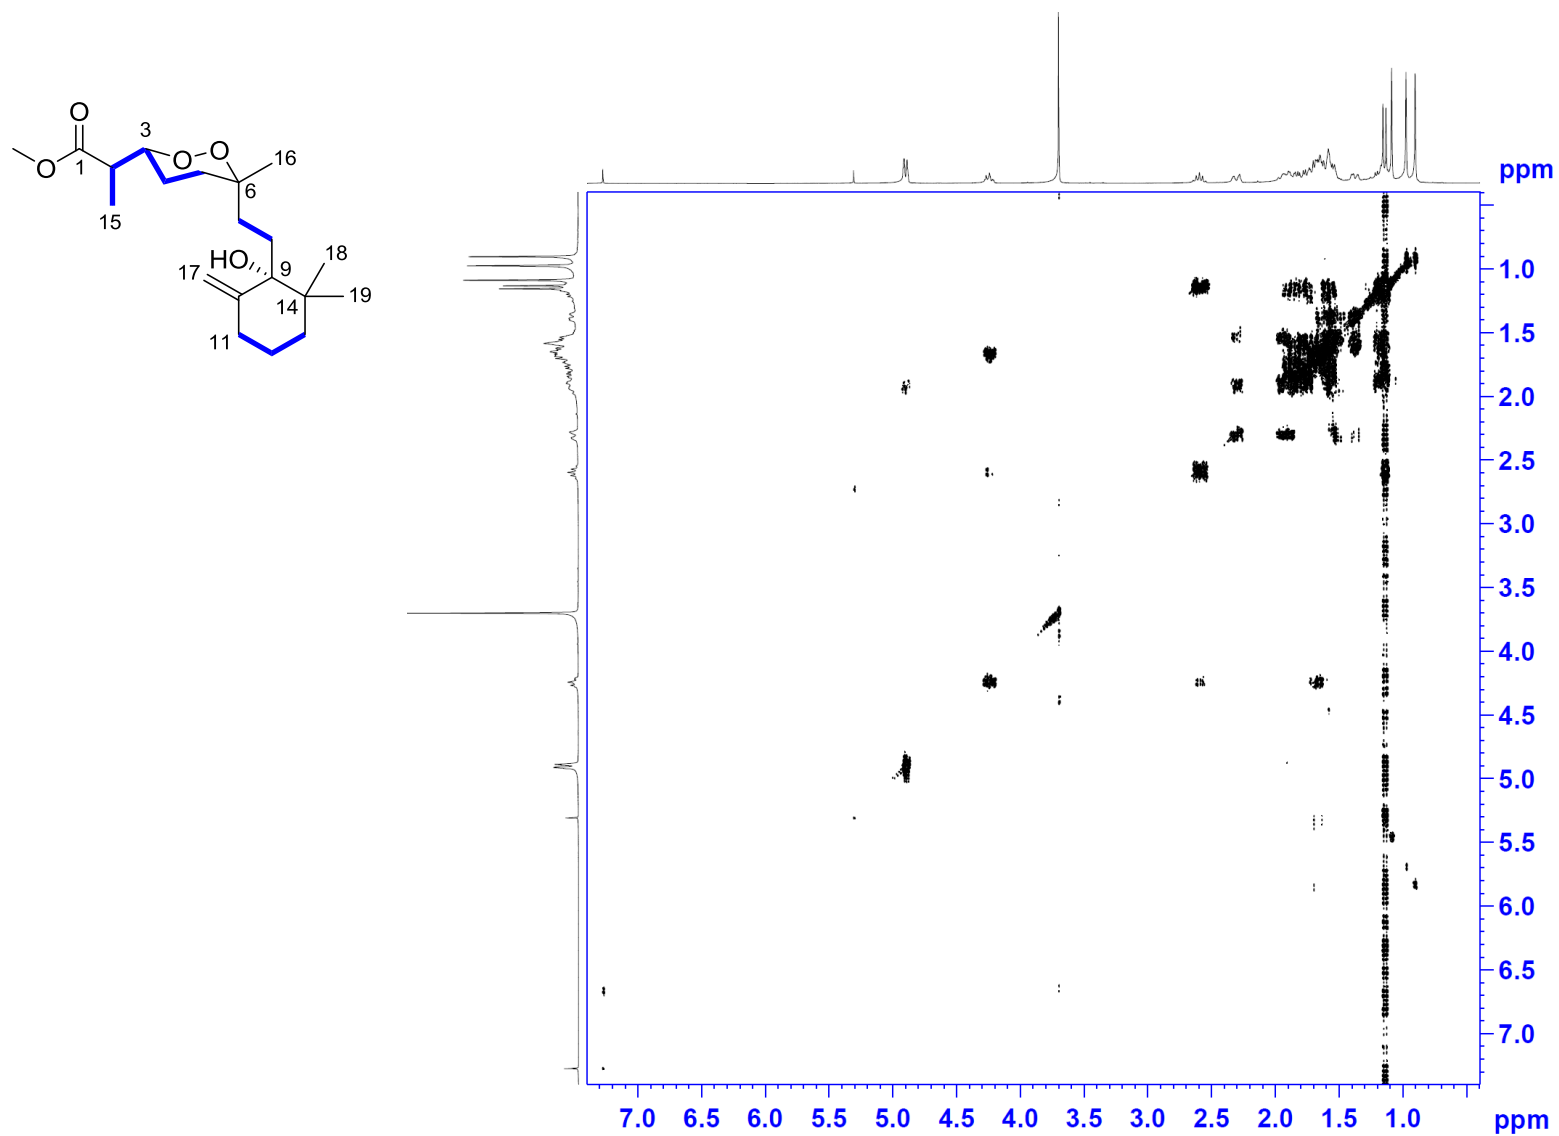

Figure S22. HSQC spectrum of diacarpoxide J (3) in CDCl<sub>3</sub>.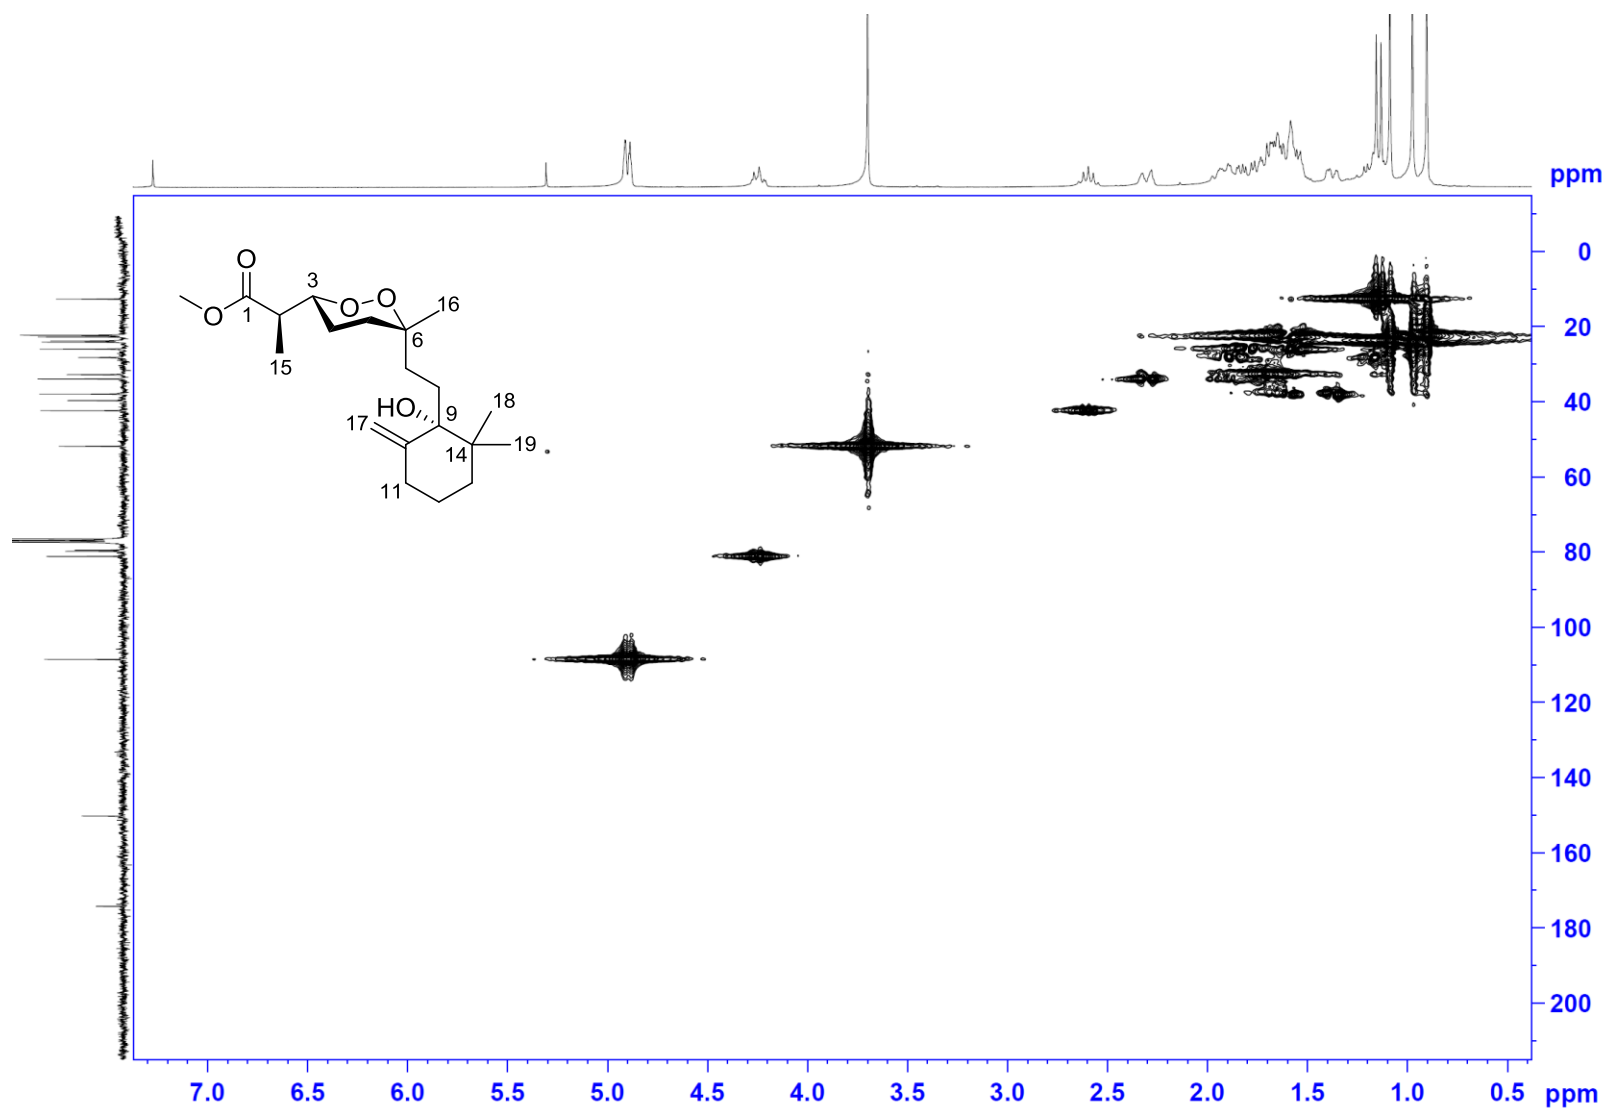



**Figure S23.** HMBC spectrum of diacarpoxide J (**3**) in  $\text{CDCl}_3$ .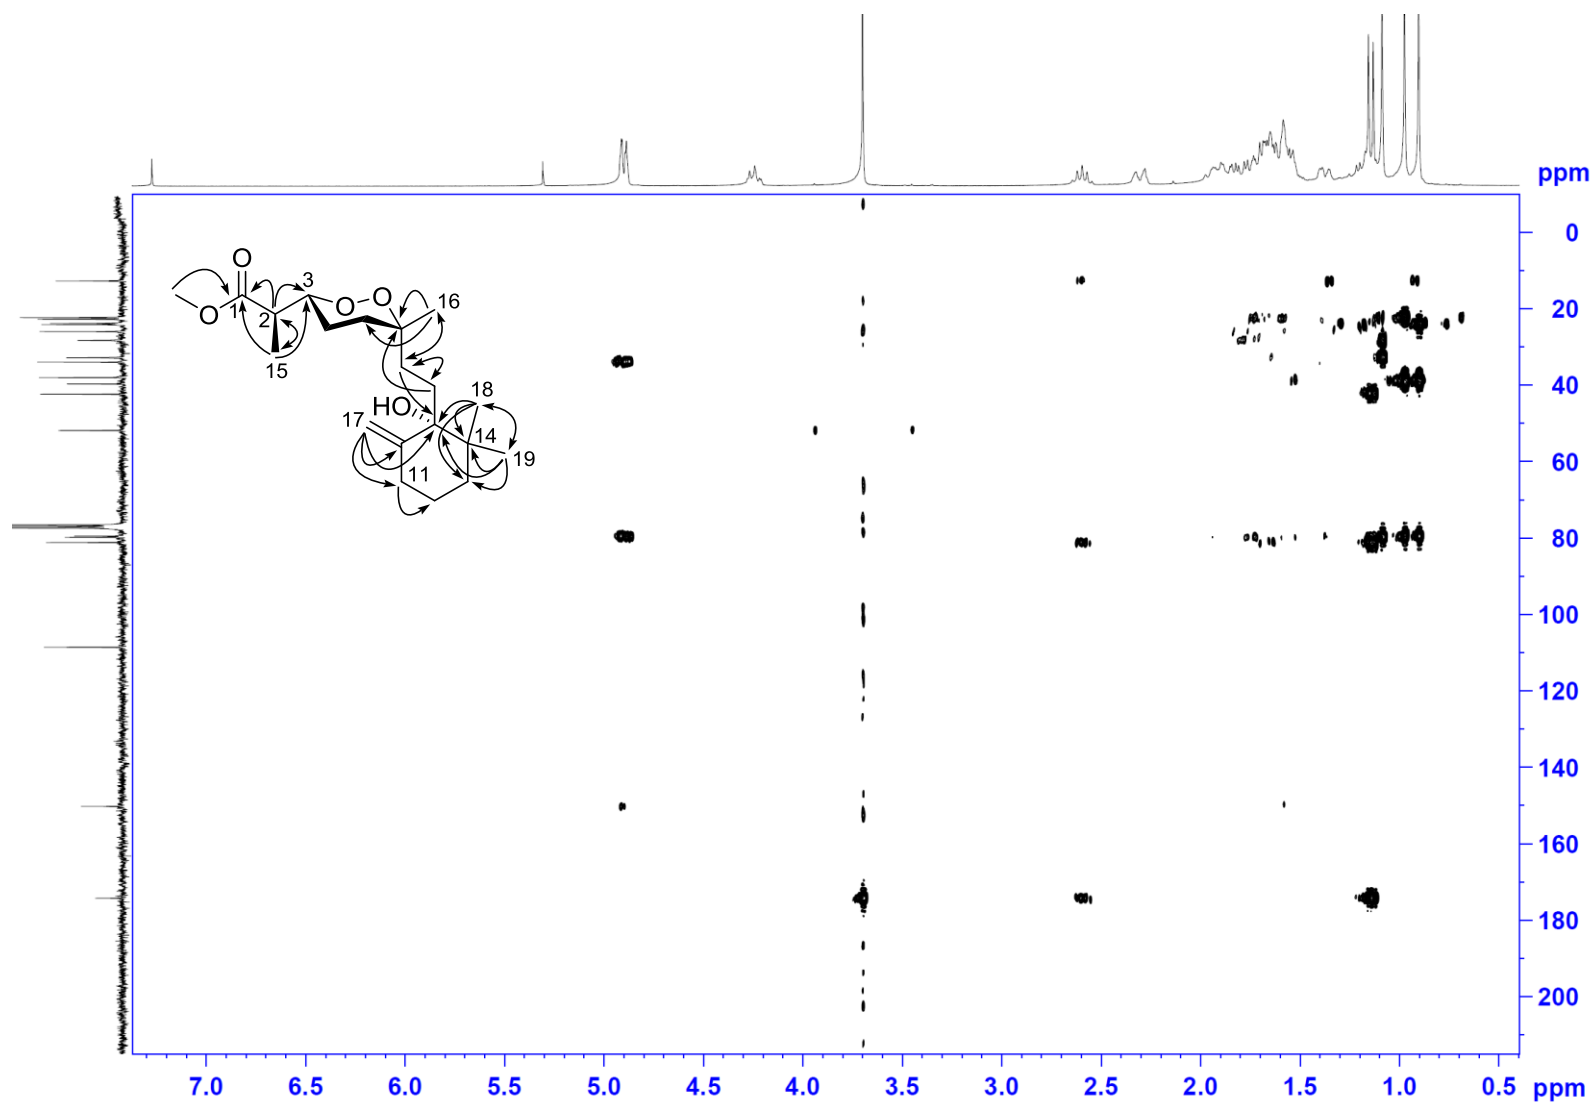

**Figure S24.** NOESY spectrum of diacarpoxide J (3) in DMSO.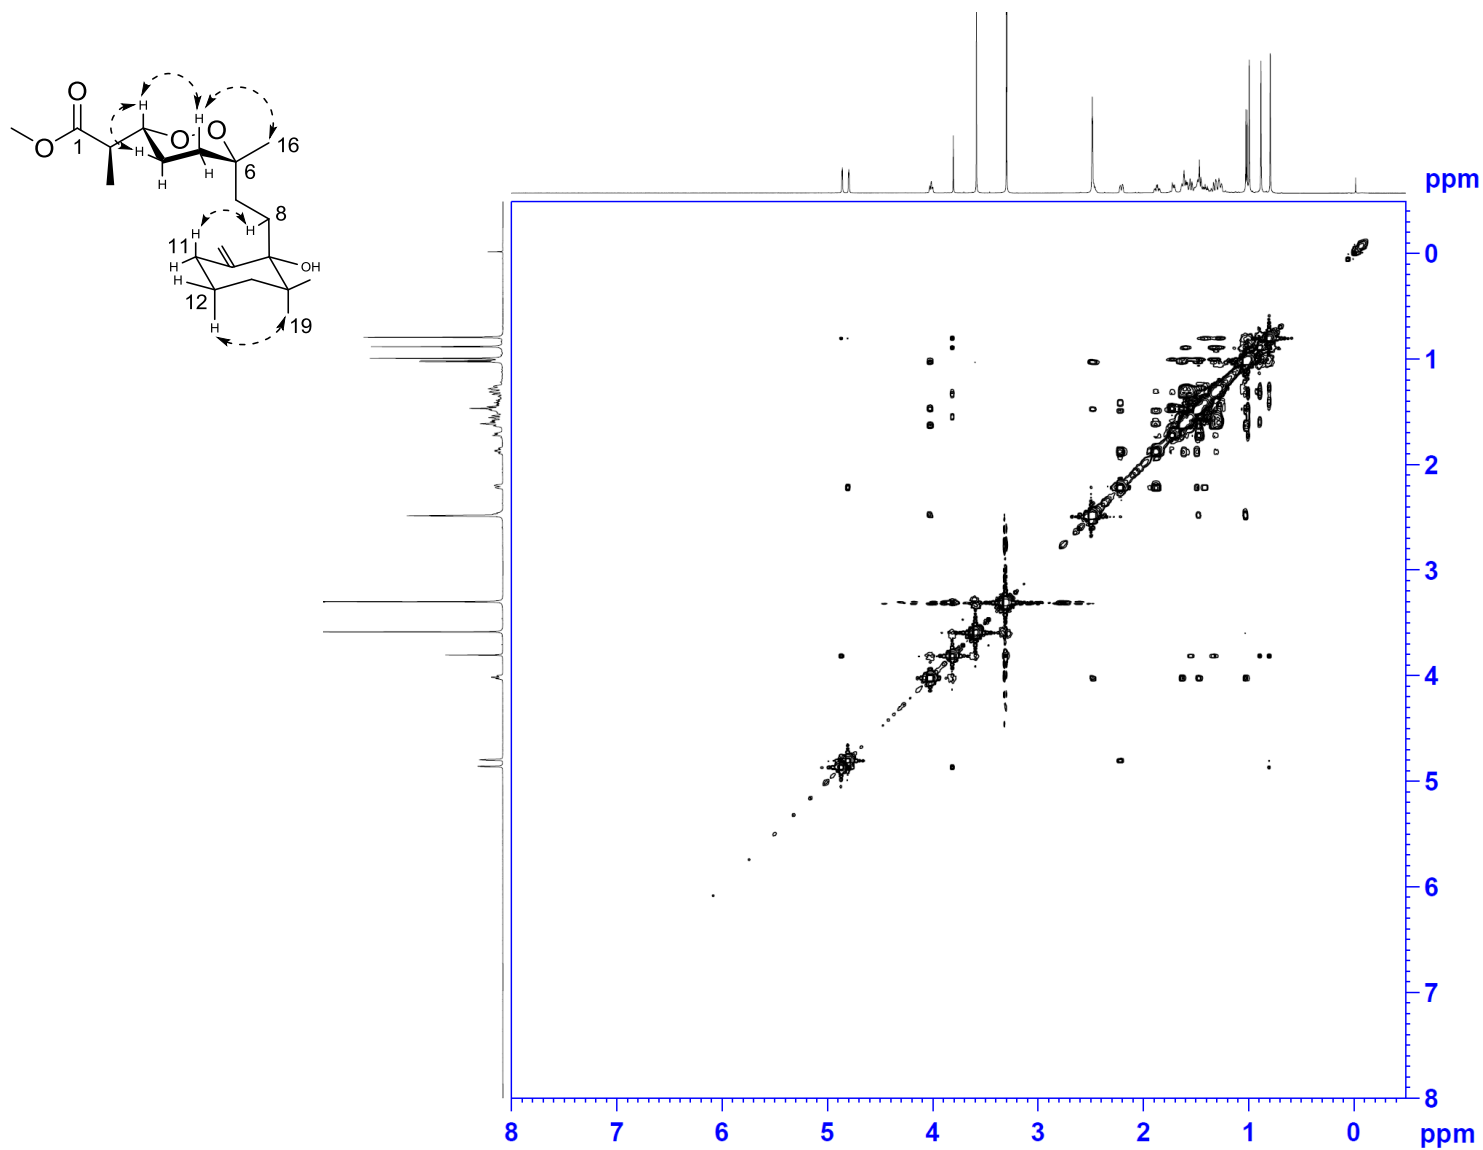

**Figure S25.** High resolution ESI mass spectrum of diacarperoxide K (4).

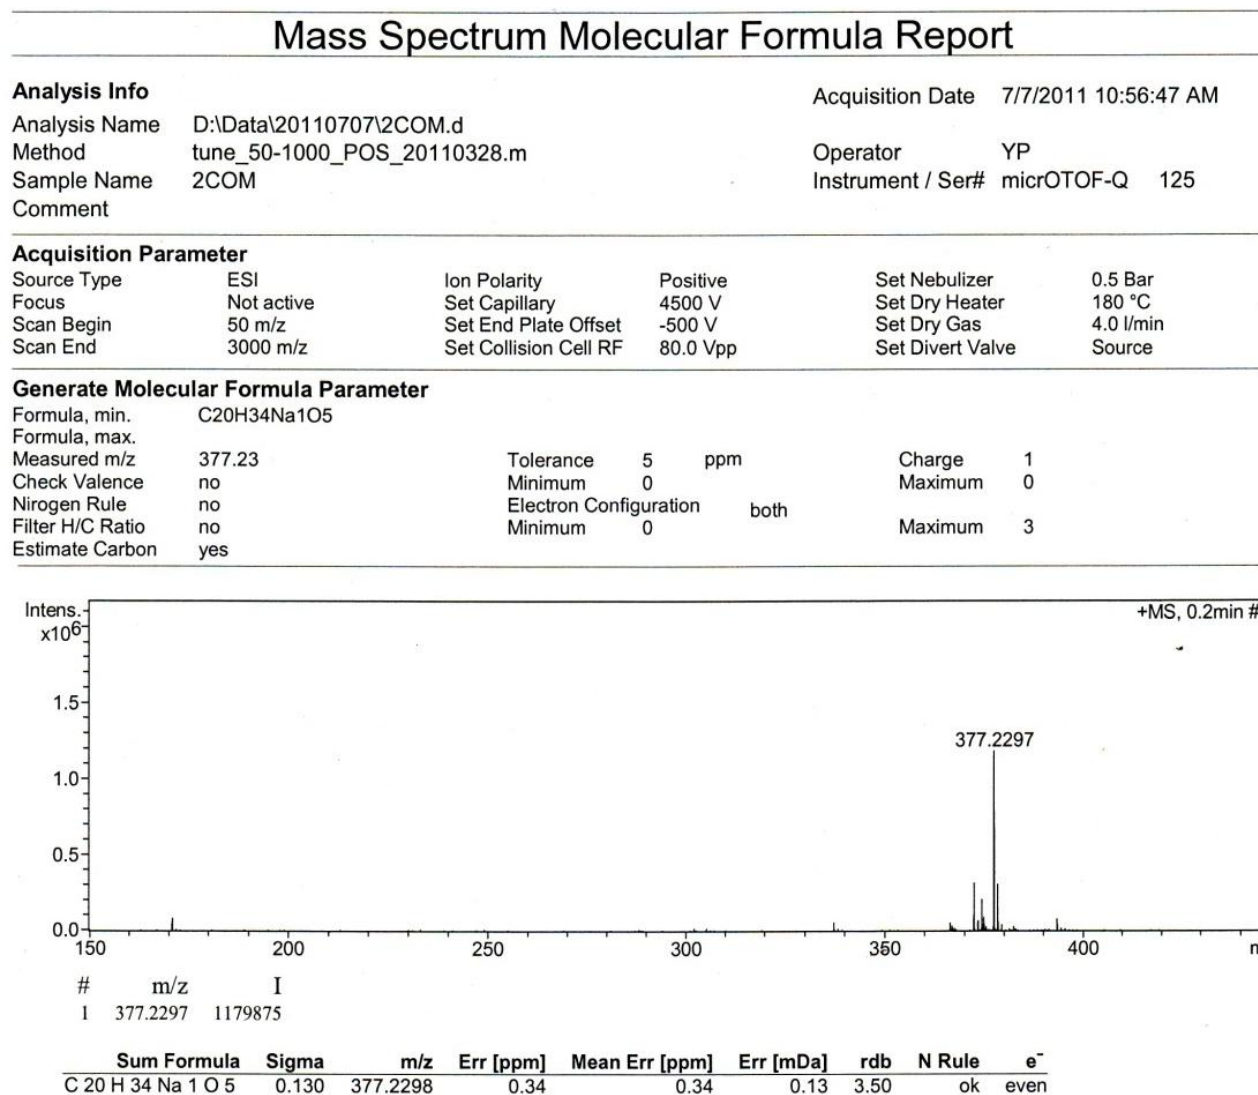

Figure S26. IR spectrum of diacarperoxide K (4).

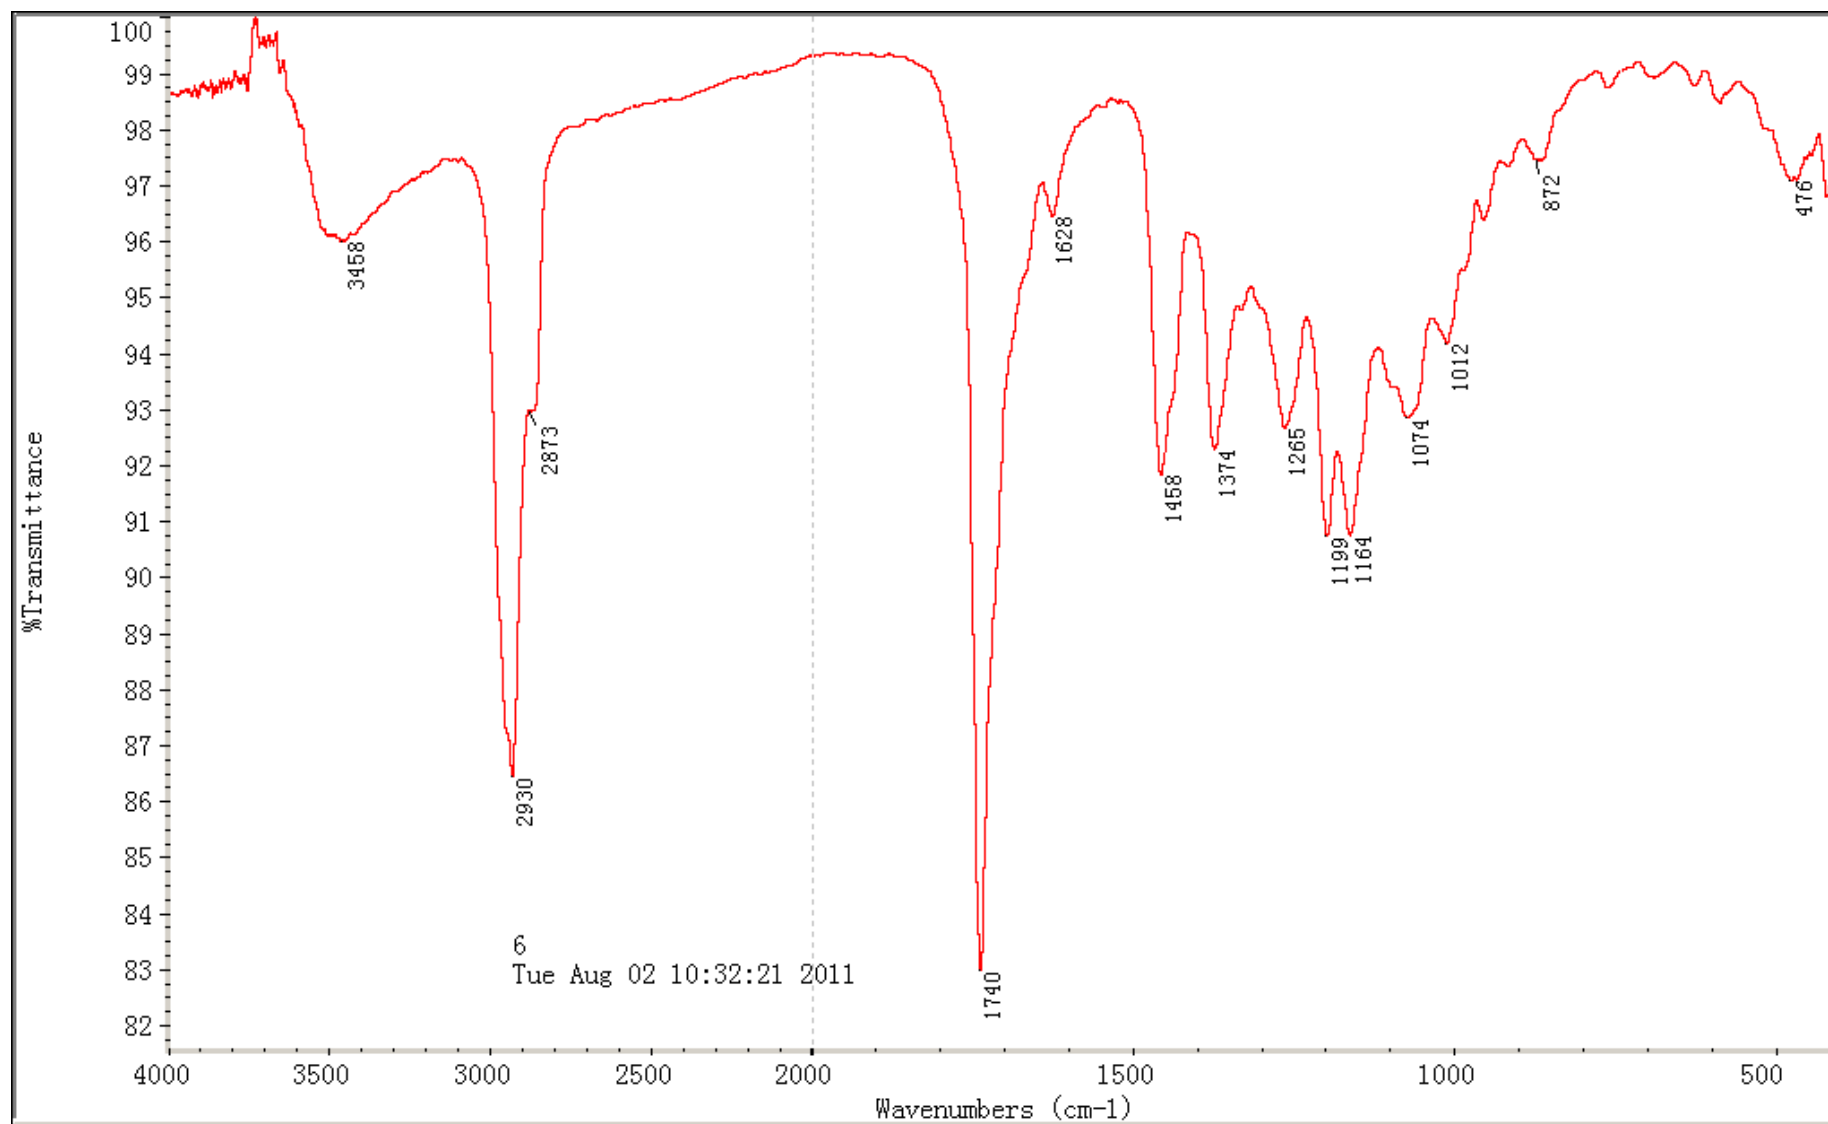

Figure S27.  $^1\text{H}$  NMR spectrum of diacarpoxide K (4) in  $\text{CDCl}_3$ .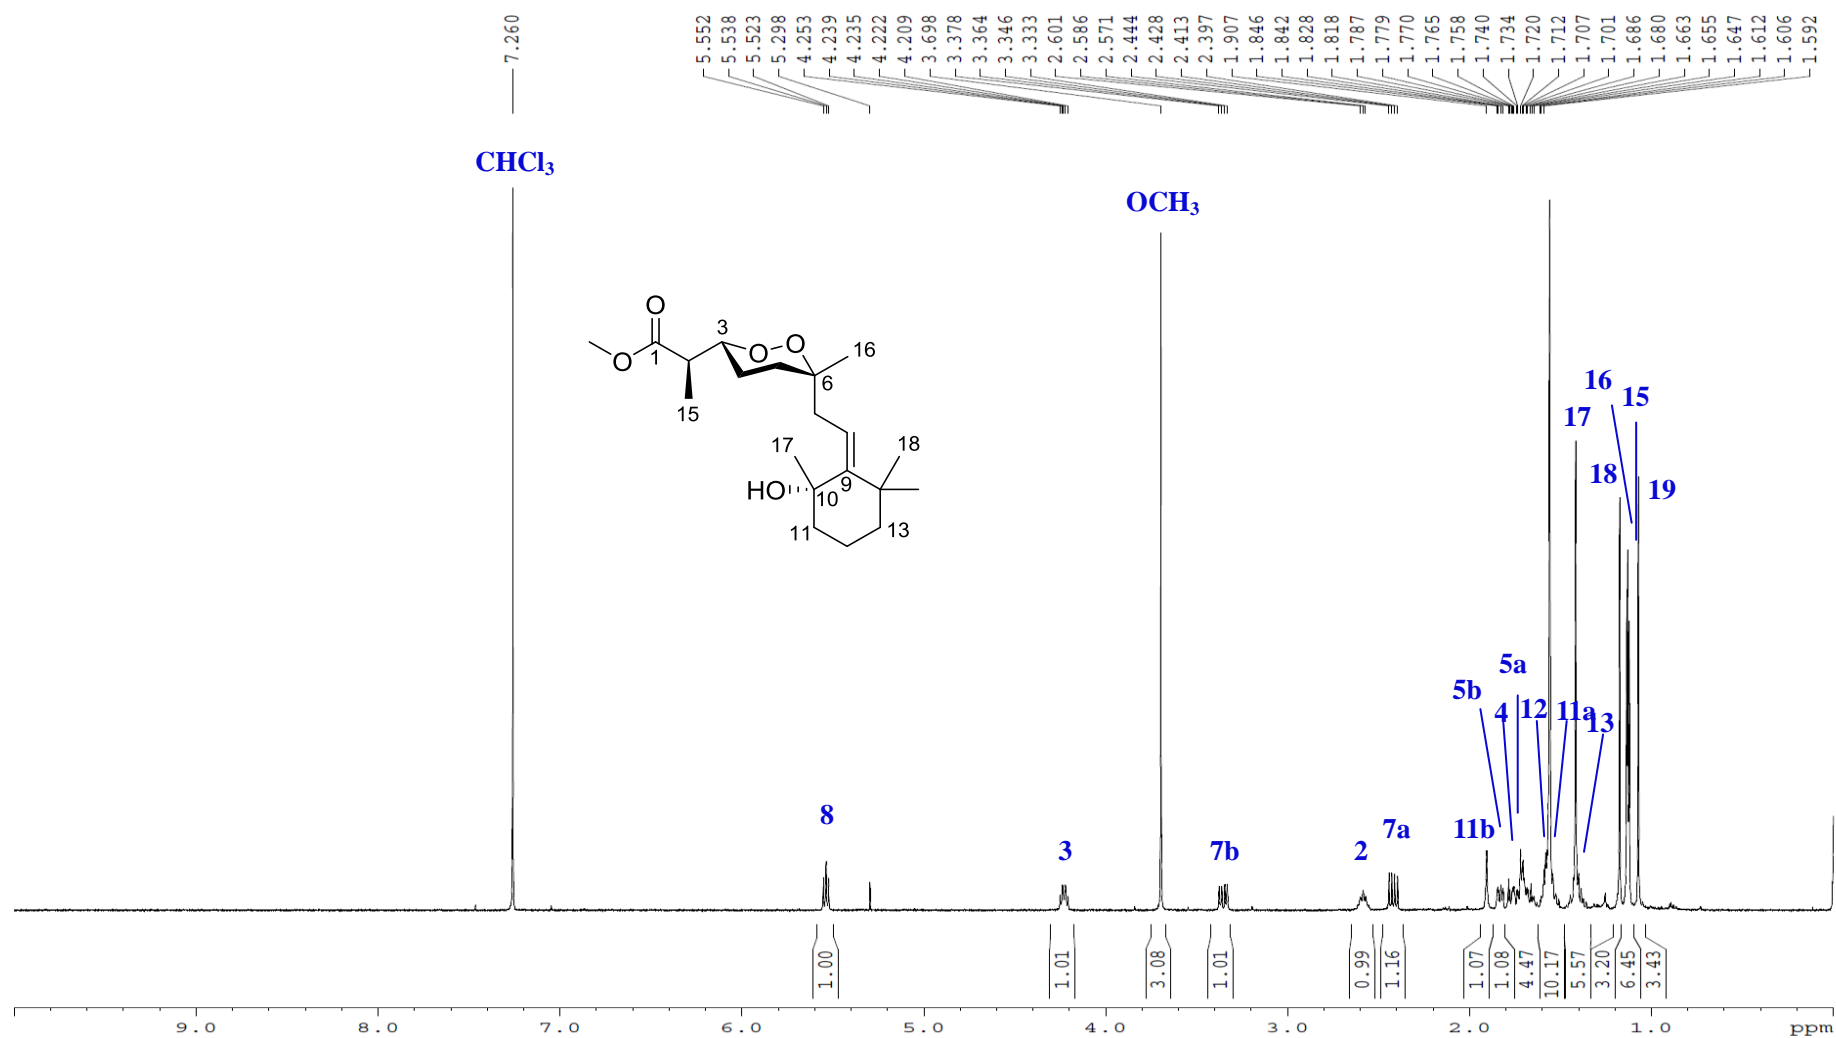

Figure S28.  $^{13}\text{C}$  NMR spectrum of diacarpoxide K (4) in  $\text{CDCl}_3$ .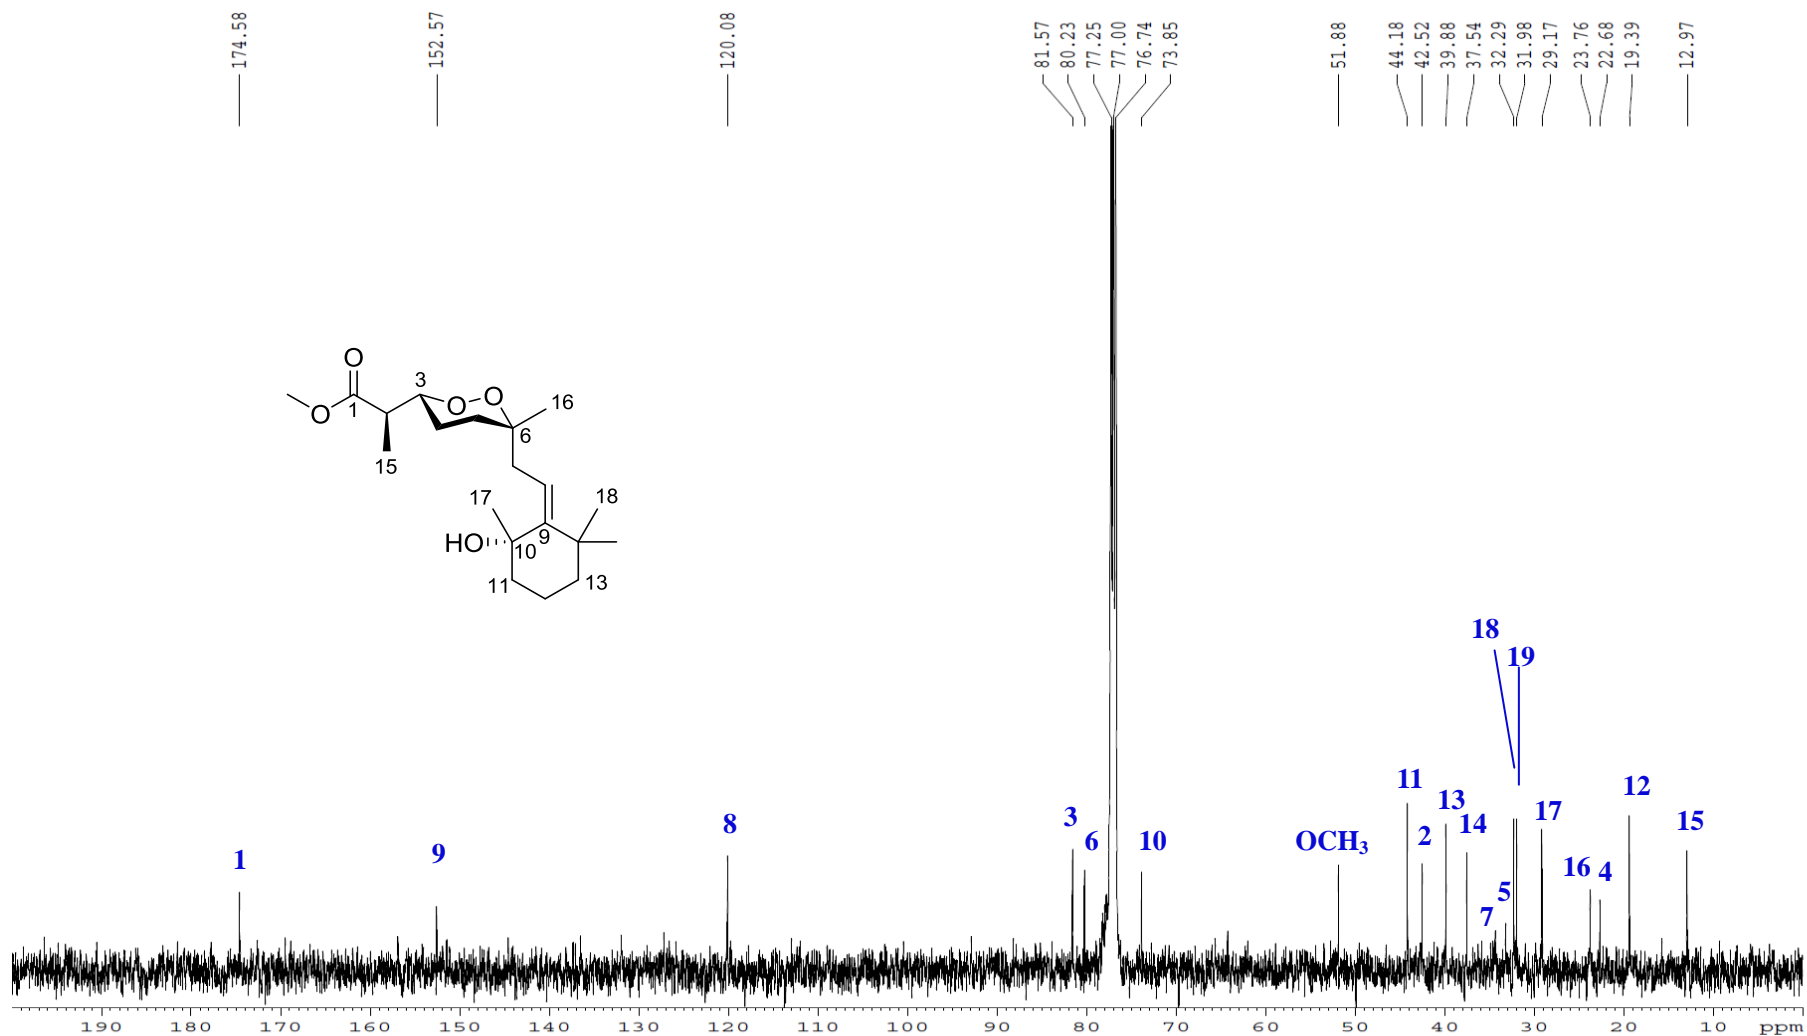

**Figure S29.**  $^1\text{H}$ - $^1\text{H}$  COSY spectrum of diacarpoxide K (**4**) in  $\text{CDCl}_3$ .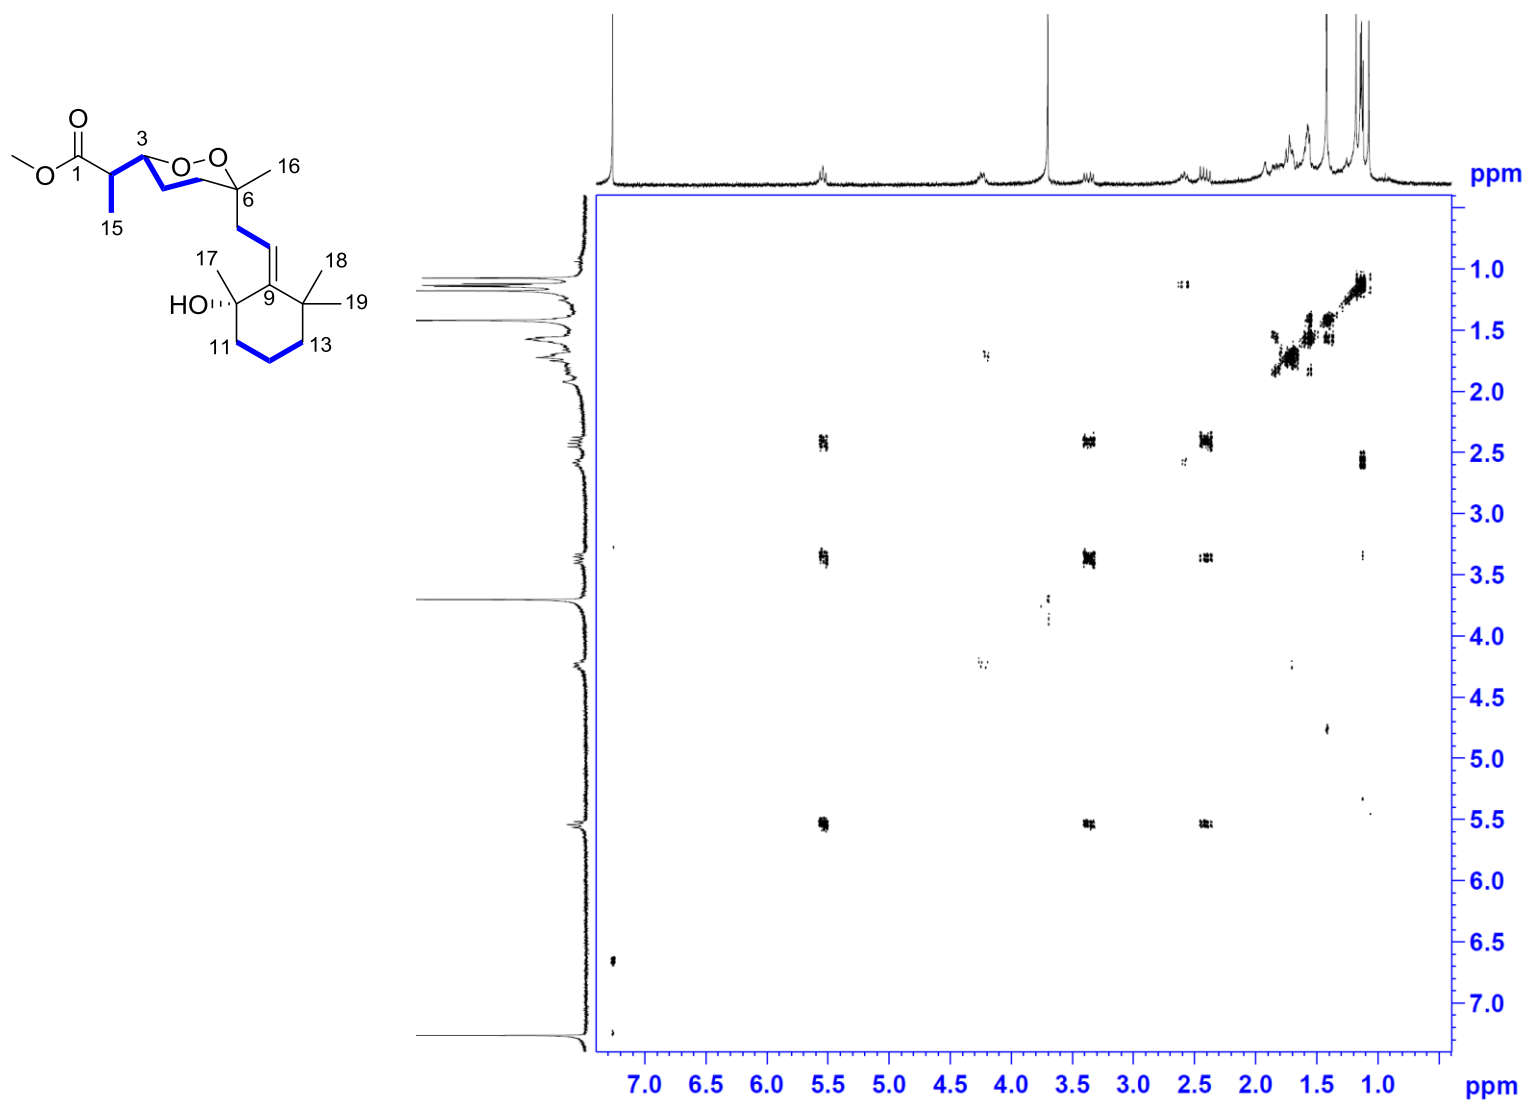

Figure S30. HSQC spectrum of diacarpoxide K (4) in CDCl<sub>3</sub>.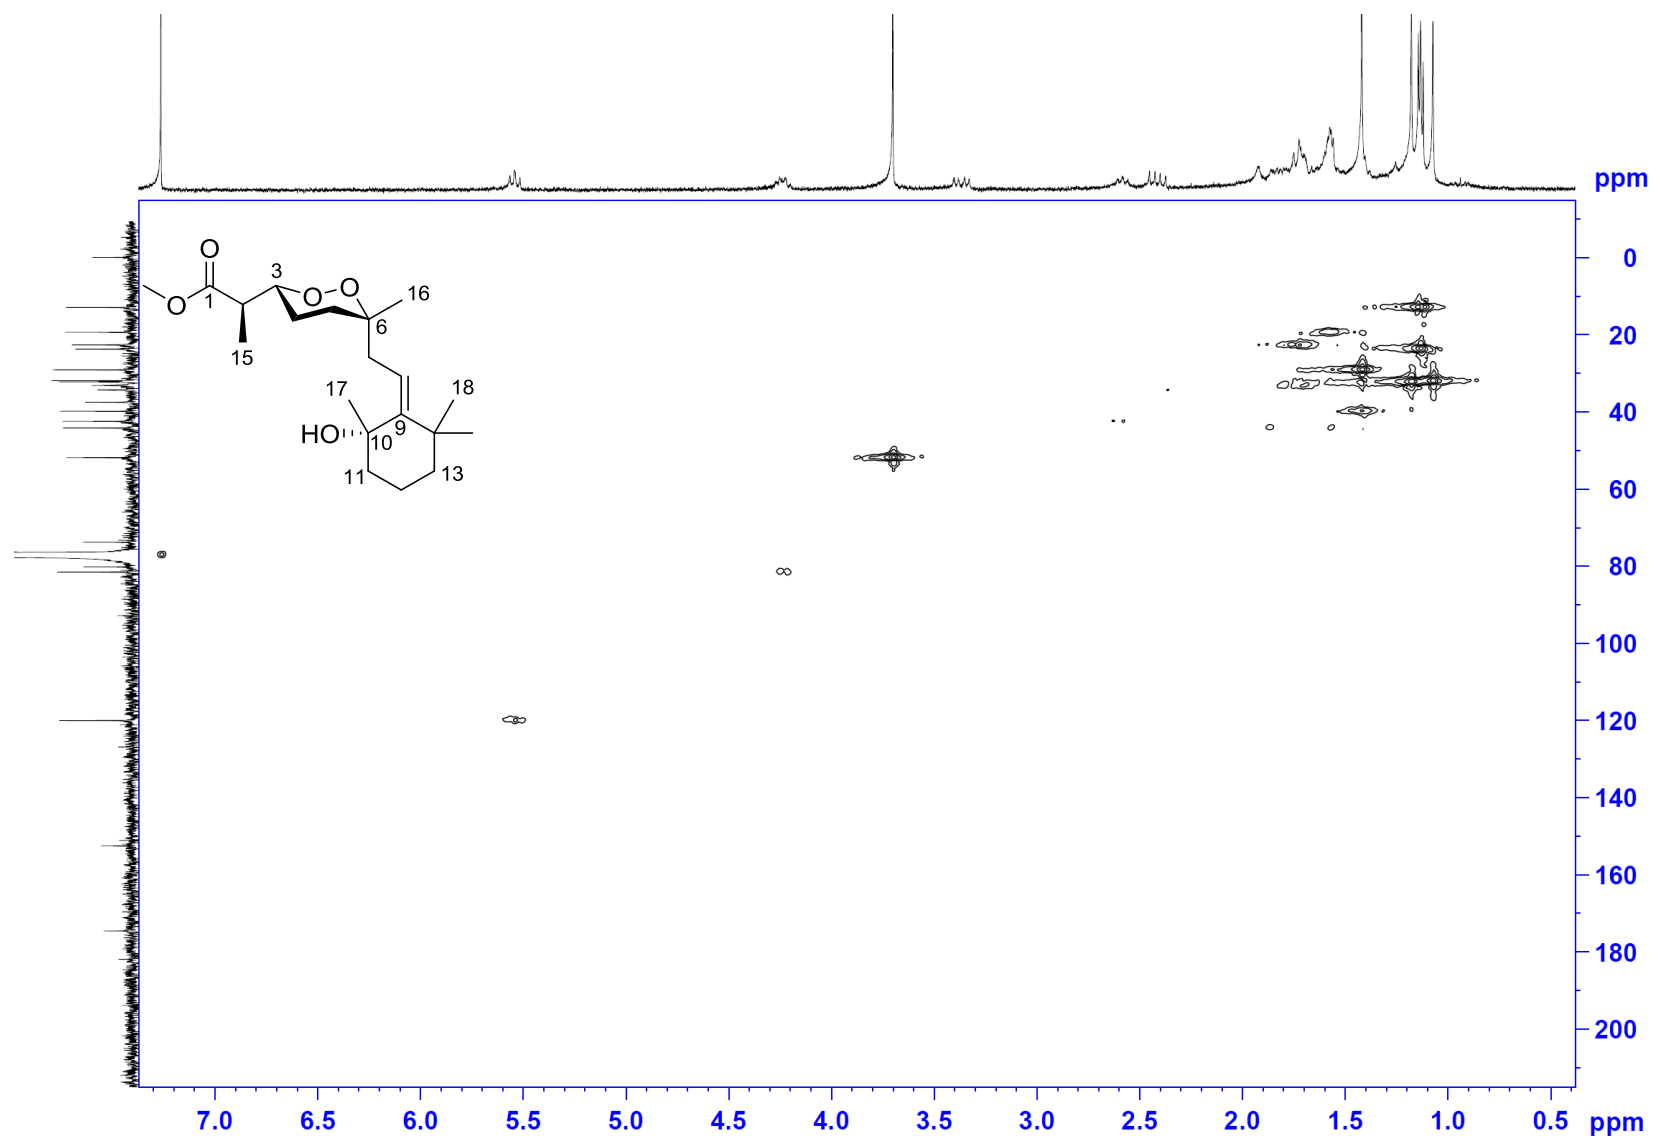



Figure S31. HMBC spectrum of diacarpoxide K (4) in CDCl<sub>3</sub>.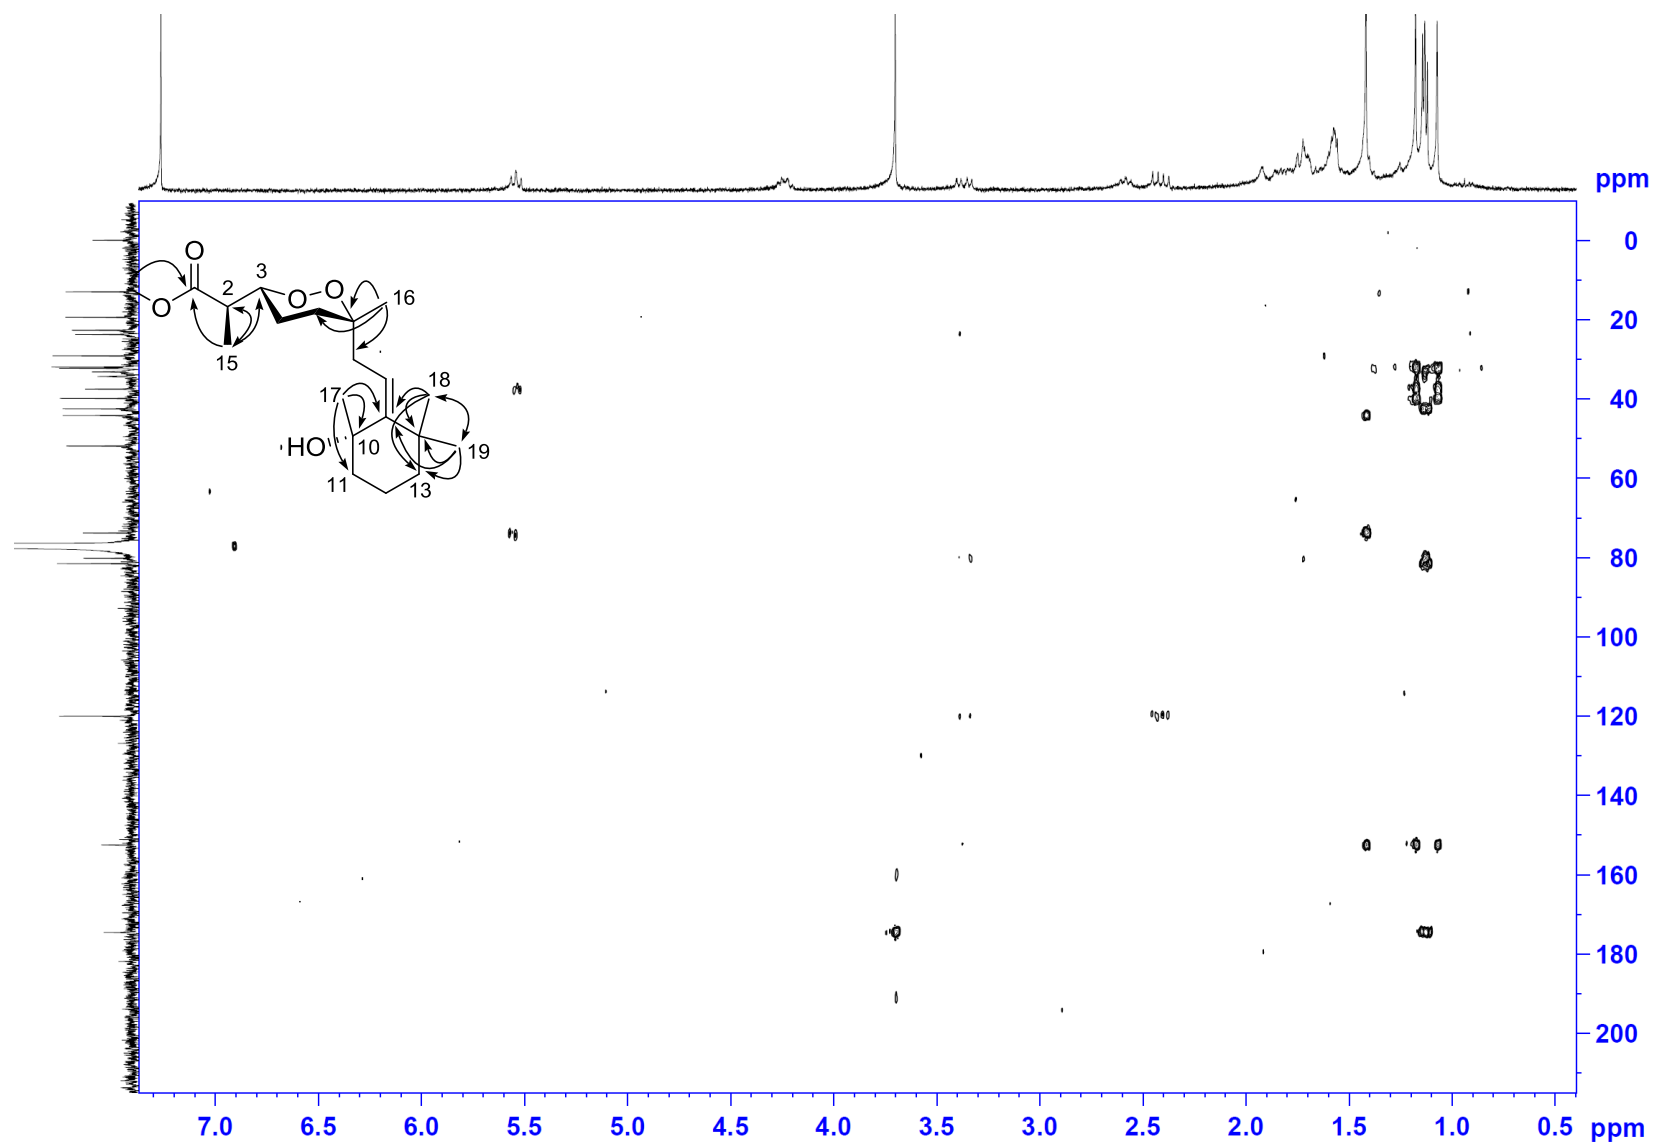

**Figure S32.** NOESY spectrum of diacarpoxide K (4) in CDCl<sub>3</sub>.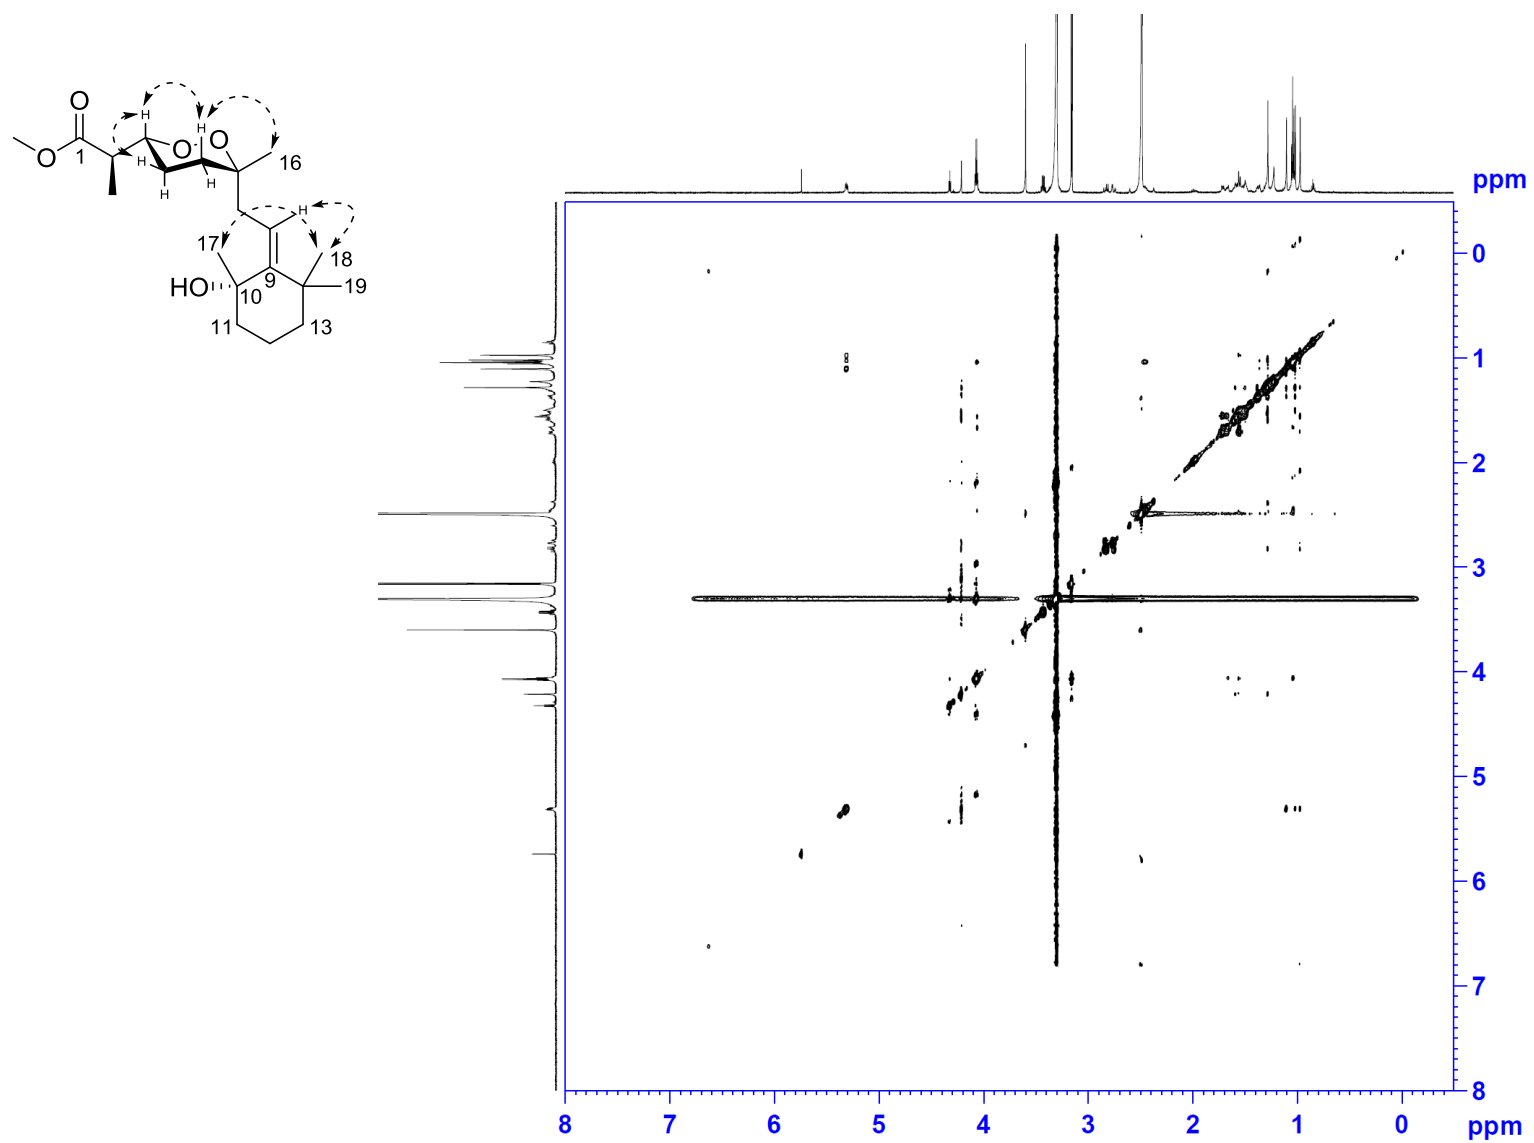

Figure S33. High resolution ESI mass spectrum of diacarperoxide L (5).

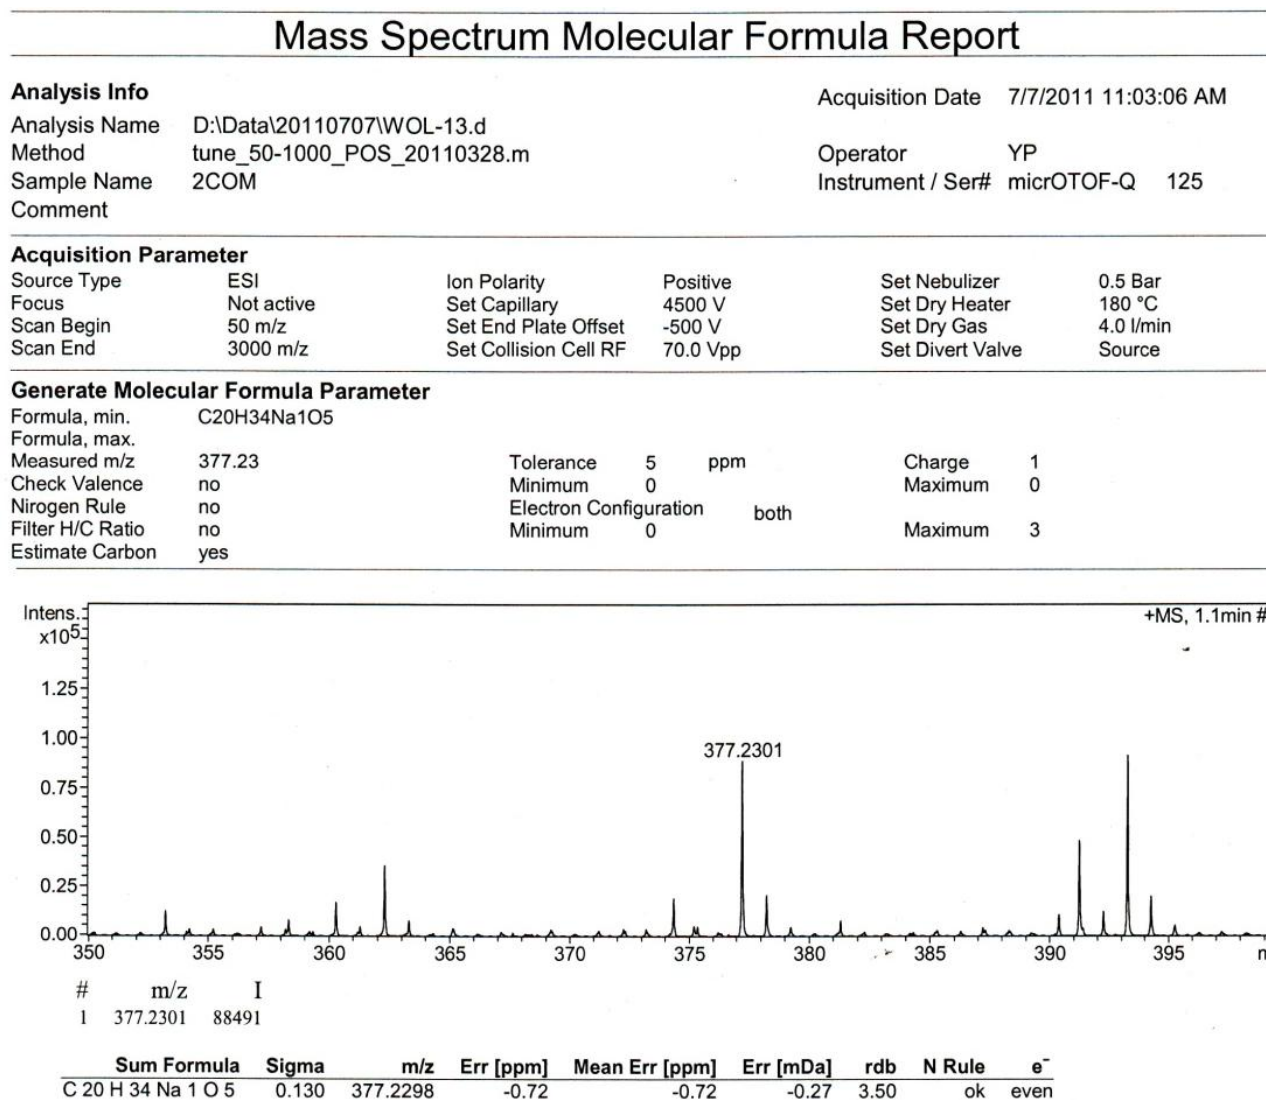

Figure S34. IR spectrum of diacarpoxide L (5).

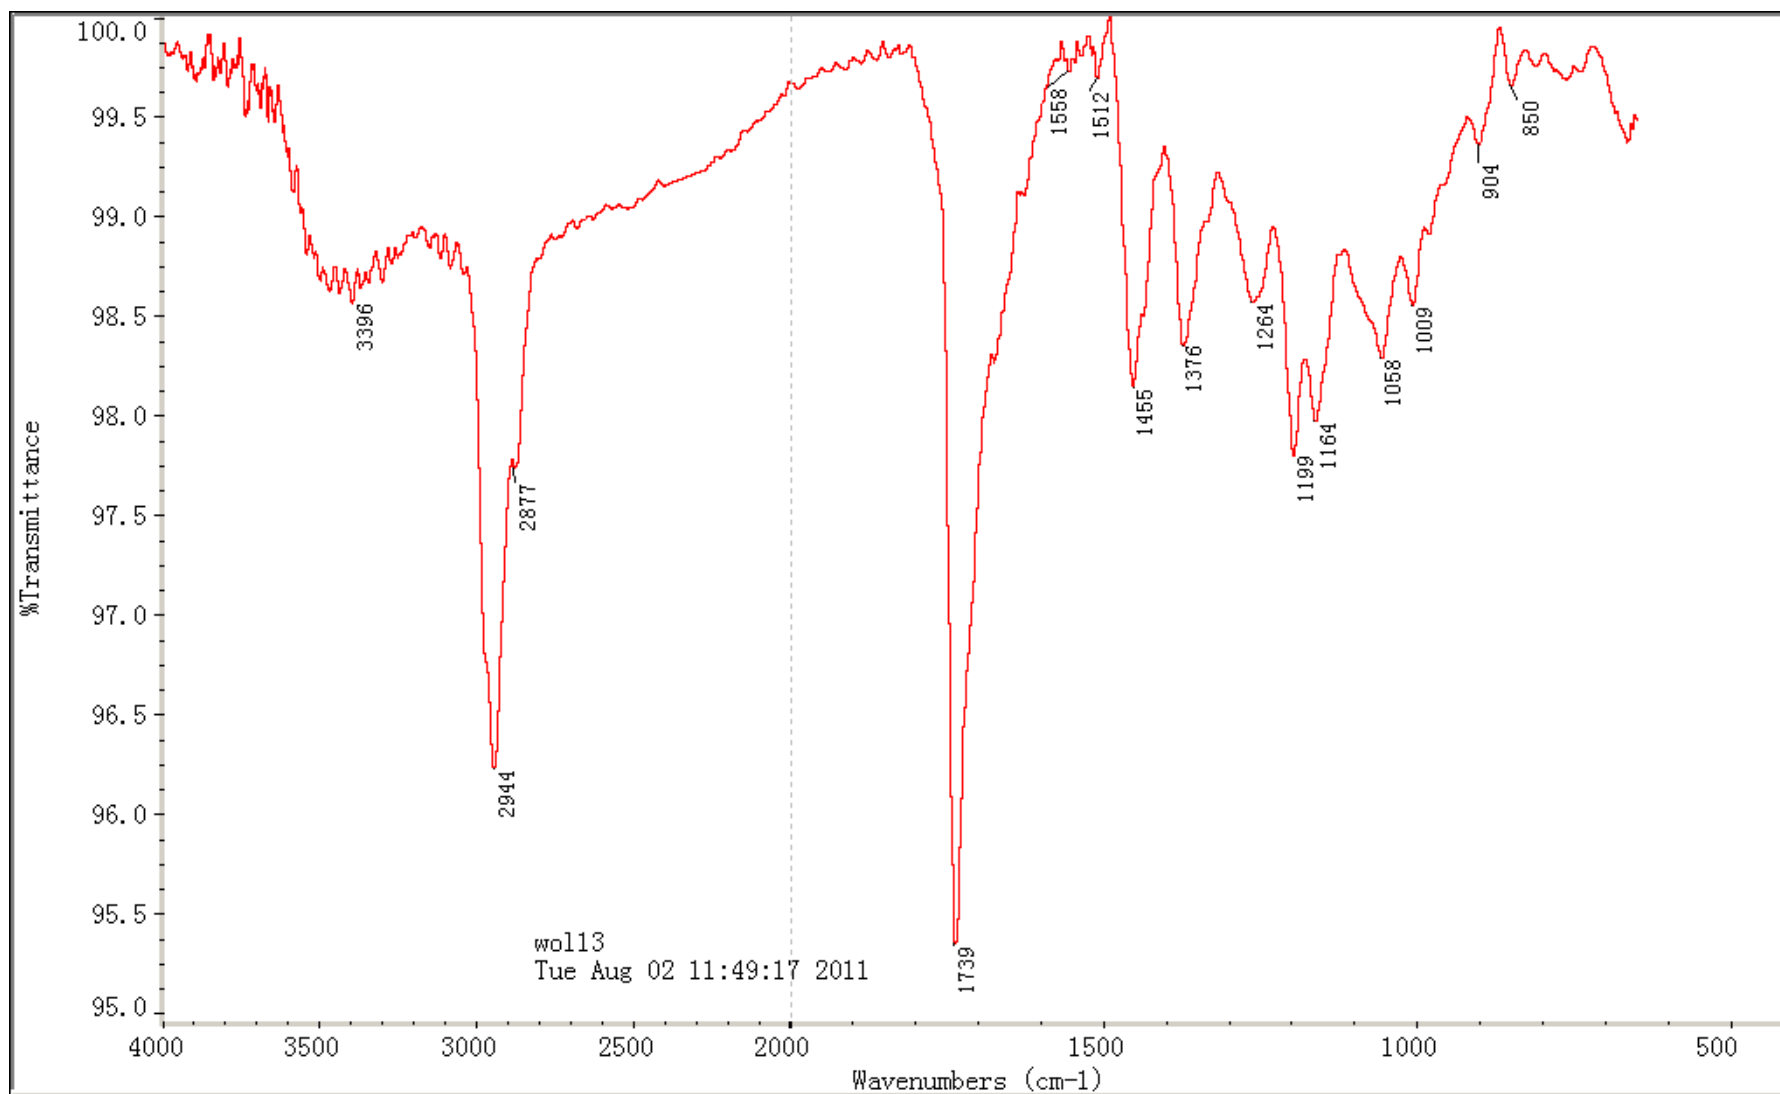

Figure S35.  $^1\text{H}$  NMR spectrum of diacarpoxide L (**5**) in  $\text{CDCl}_3$ .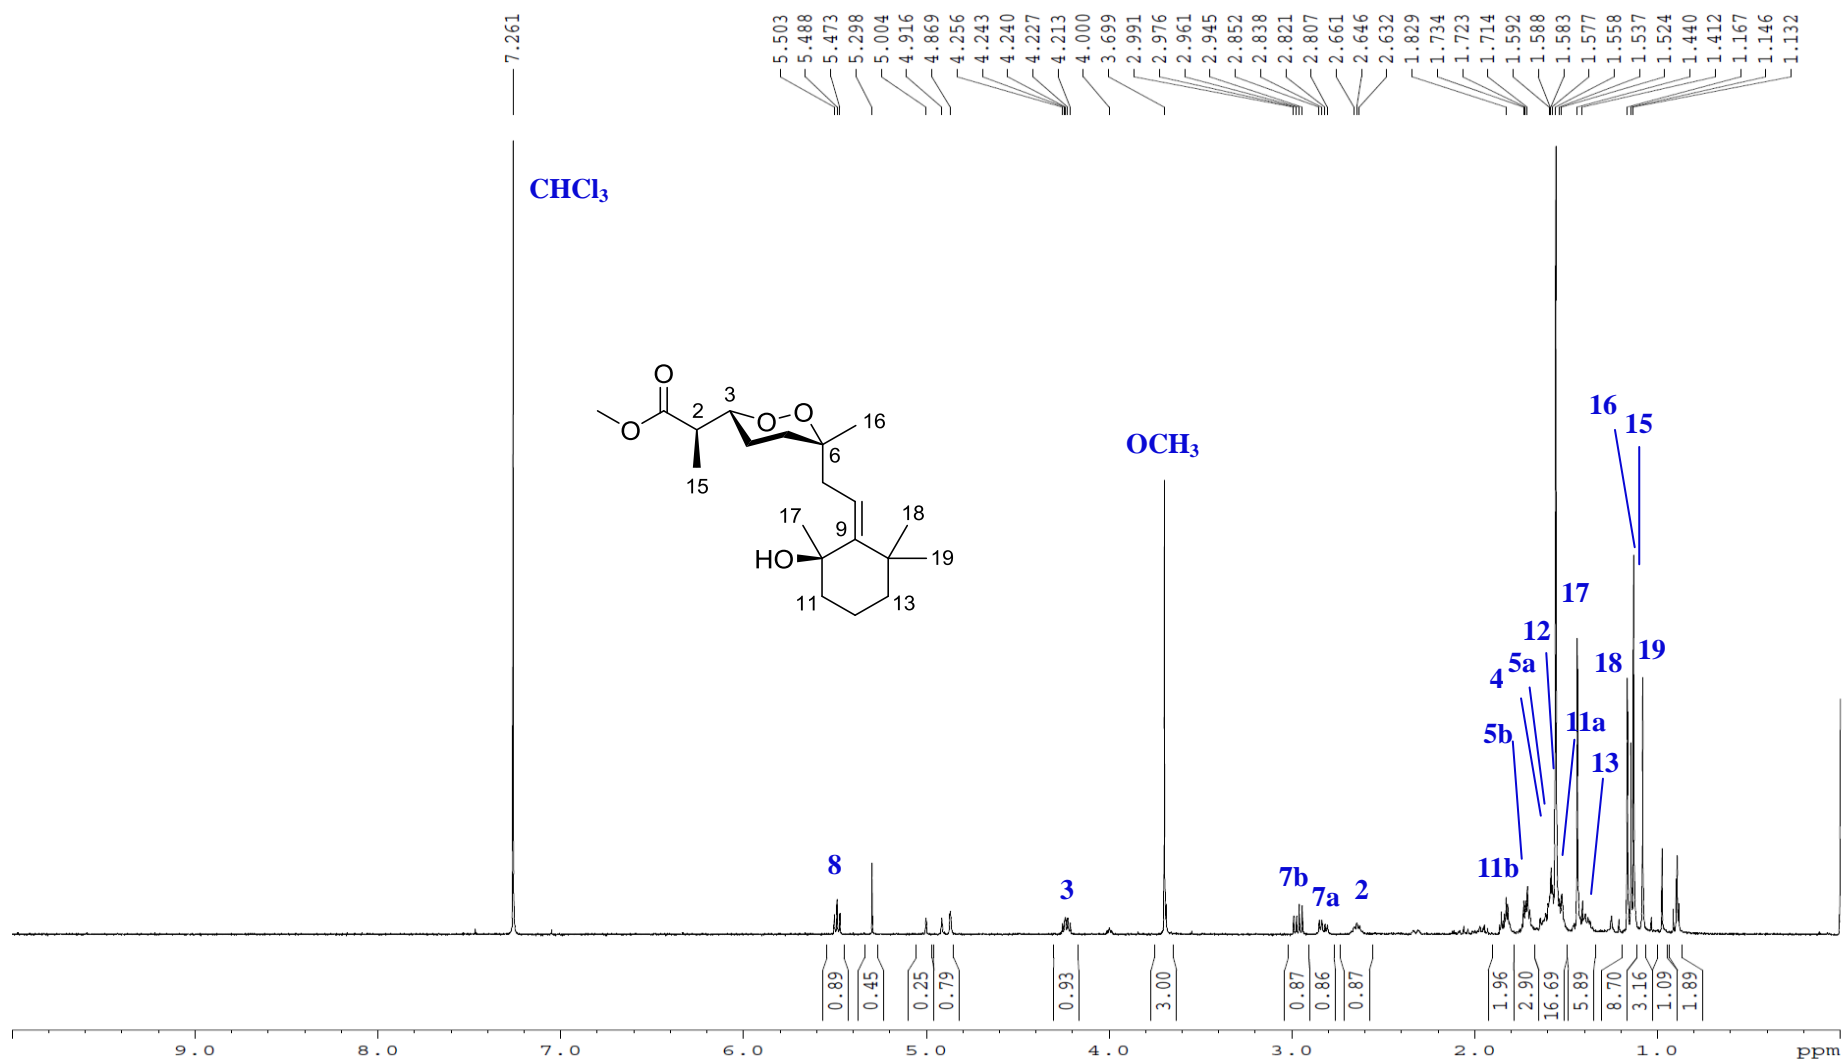

Figure S36.  $^{13}\text{C}$  NMR spectrum of diacarpoxide L (5) in  $\text{CDCl}_3$ .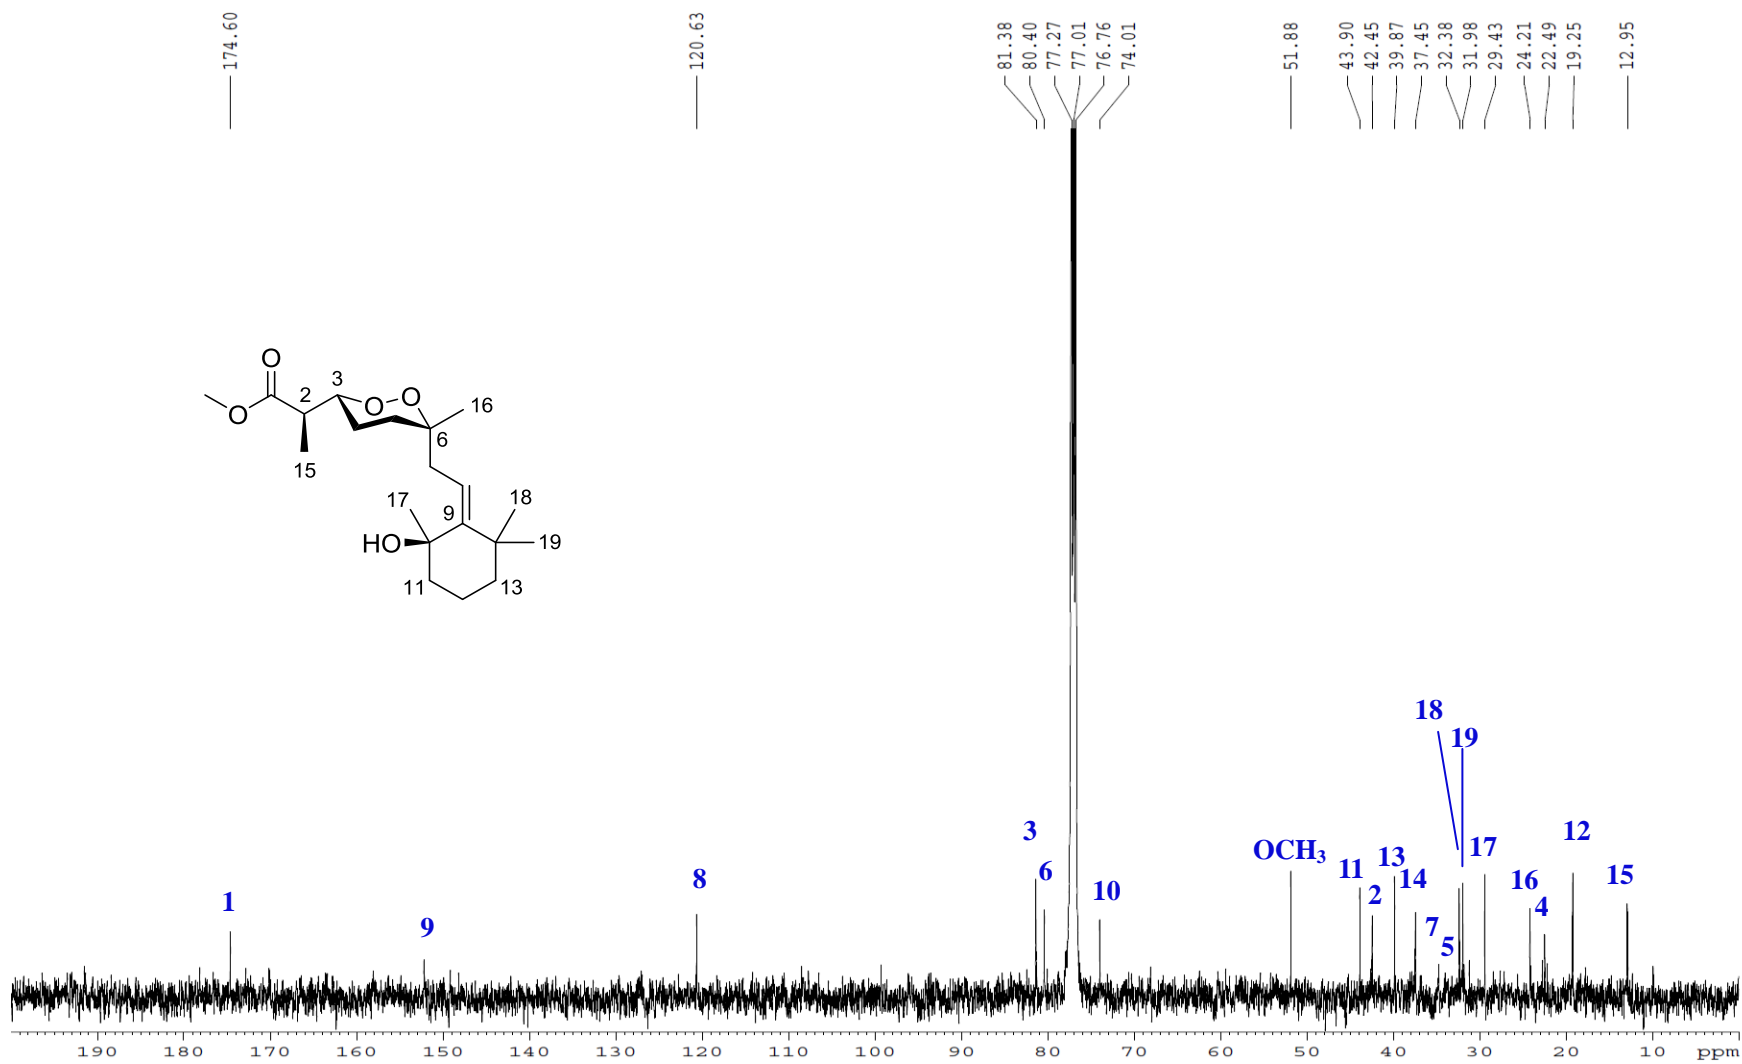

**Figure S37.**  $^1\text{H}$ - $^1\text{H}$  COSY spectrum of diacarpoxide L (**5**) in  $\text{CDCl}_3$ .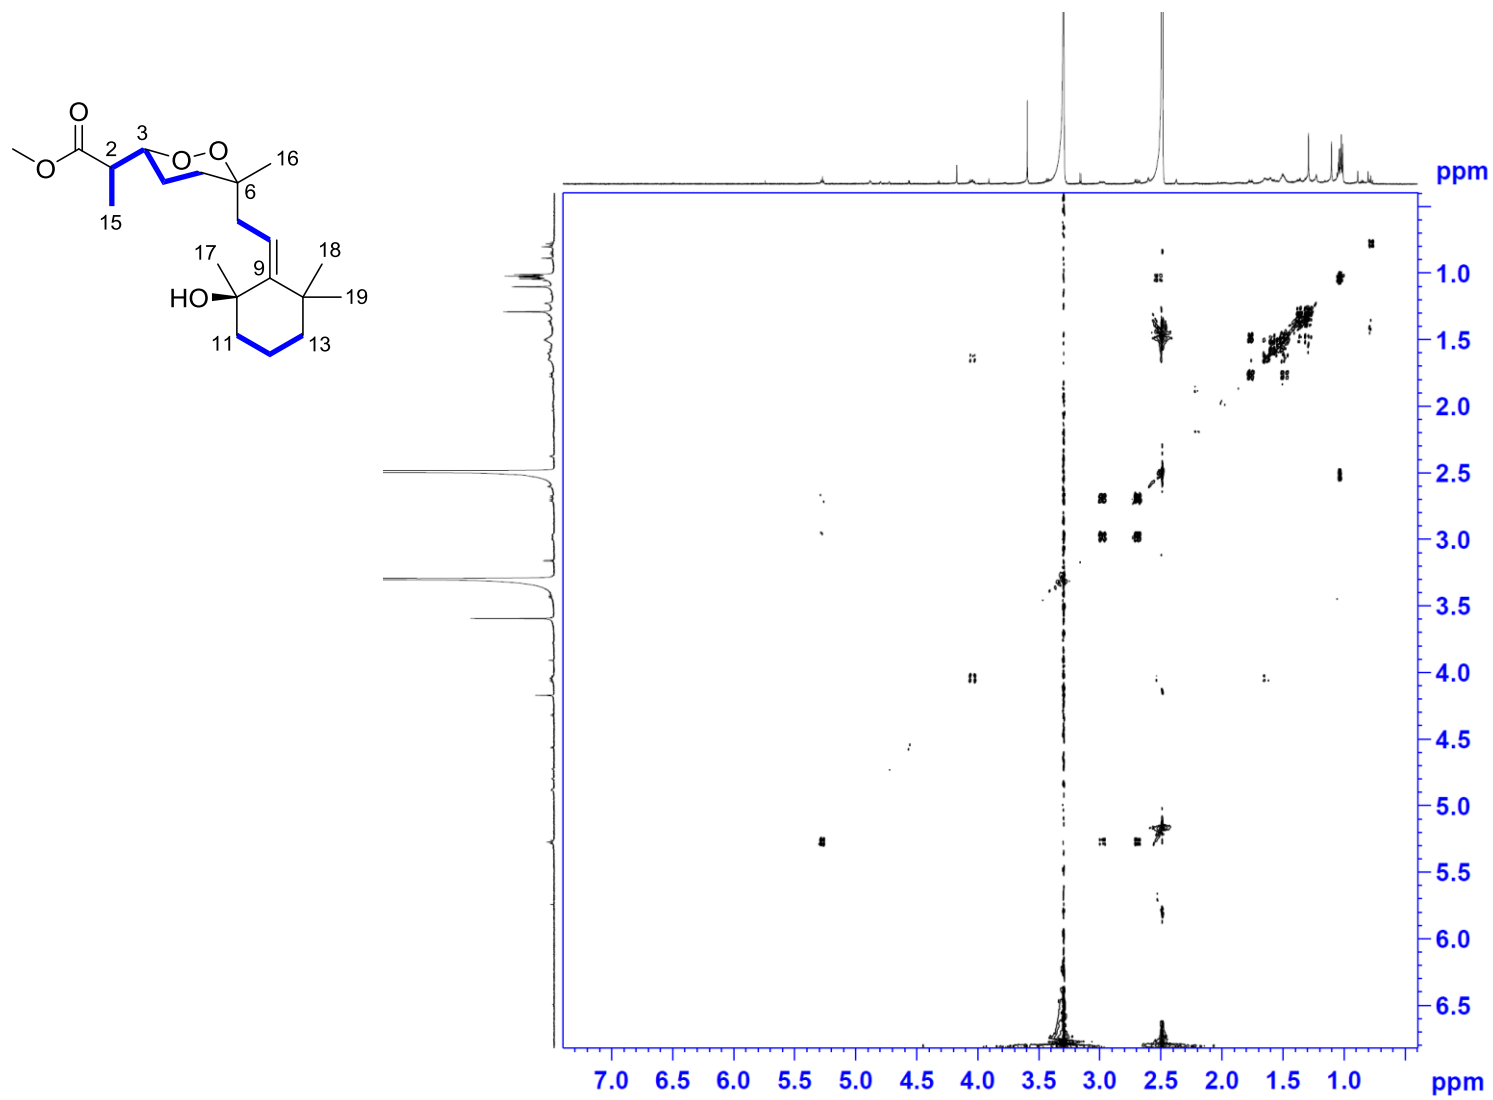

Figure S38. HSQC spectrum of diacarpoxide L (5) in  $\text{CDCl}_3$ .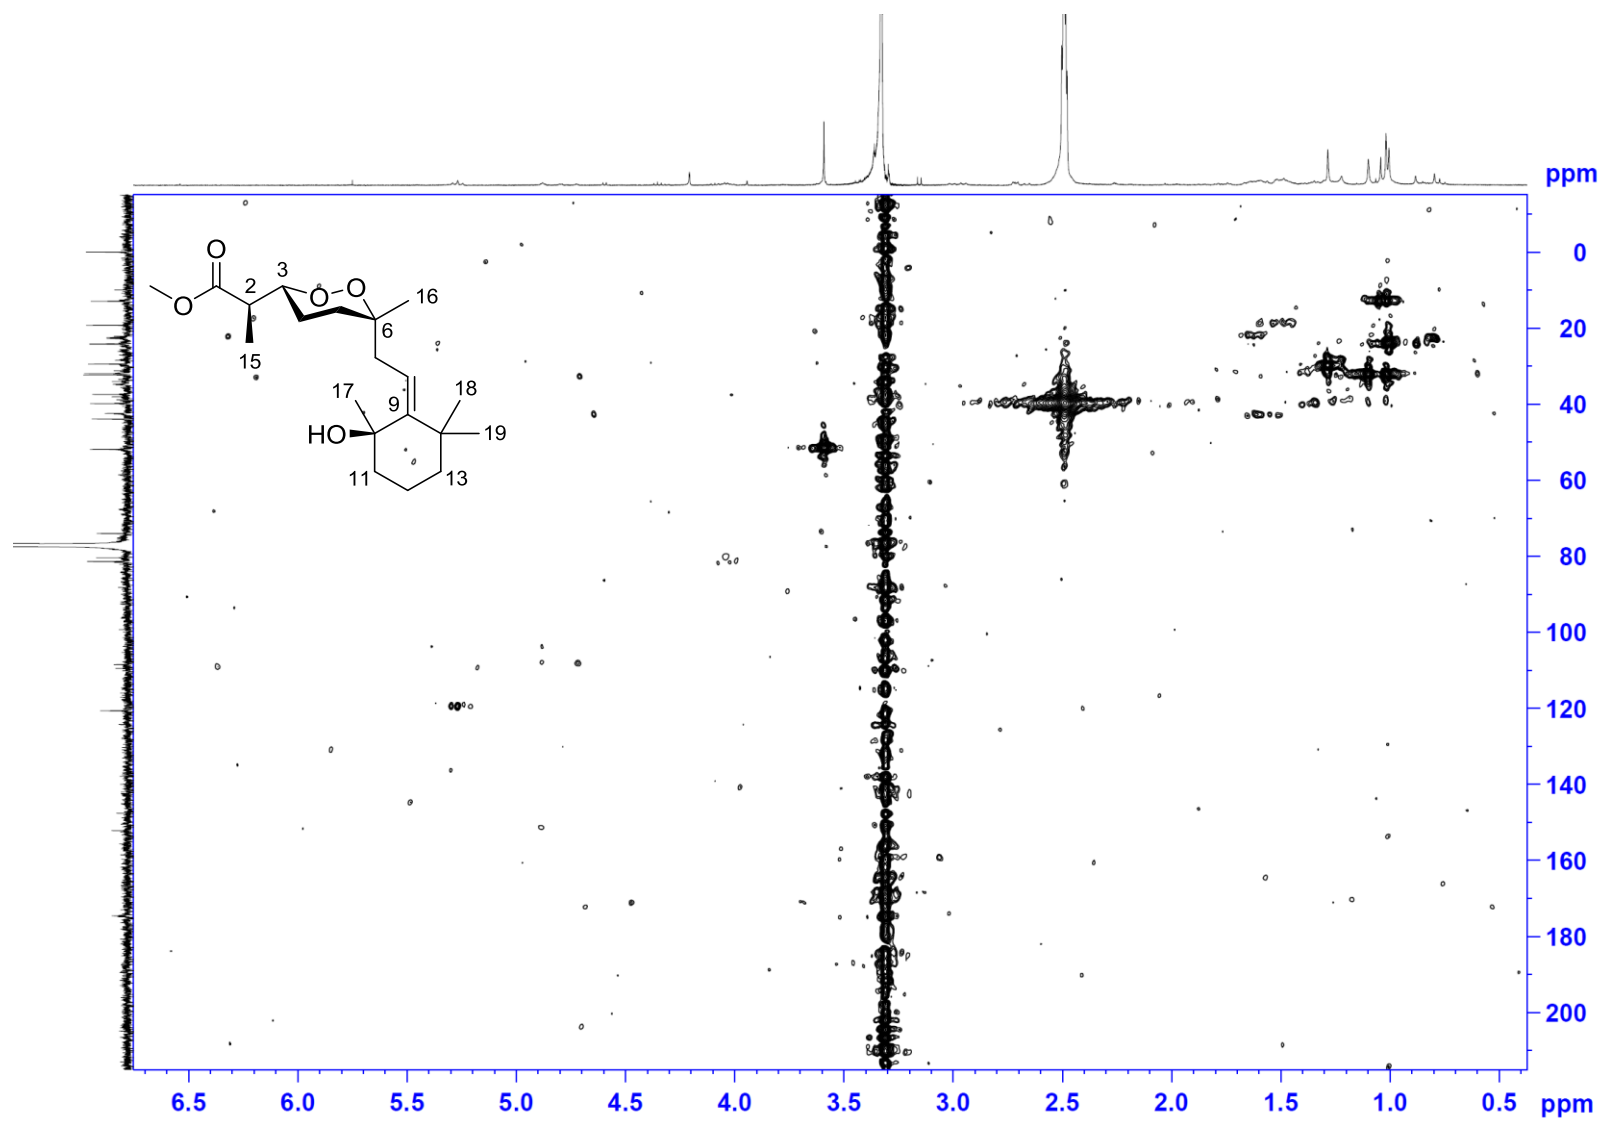



**Figure S39.** HMBC spectrum of diacarpoxide L (**5**) in CDCl<sub>3</sub>.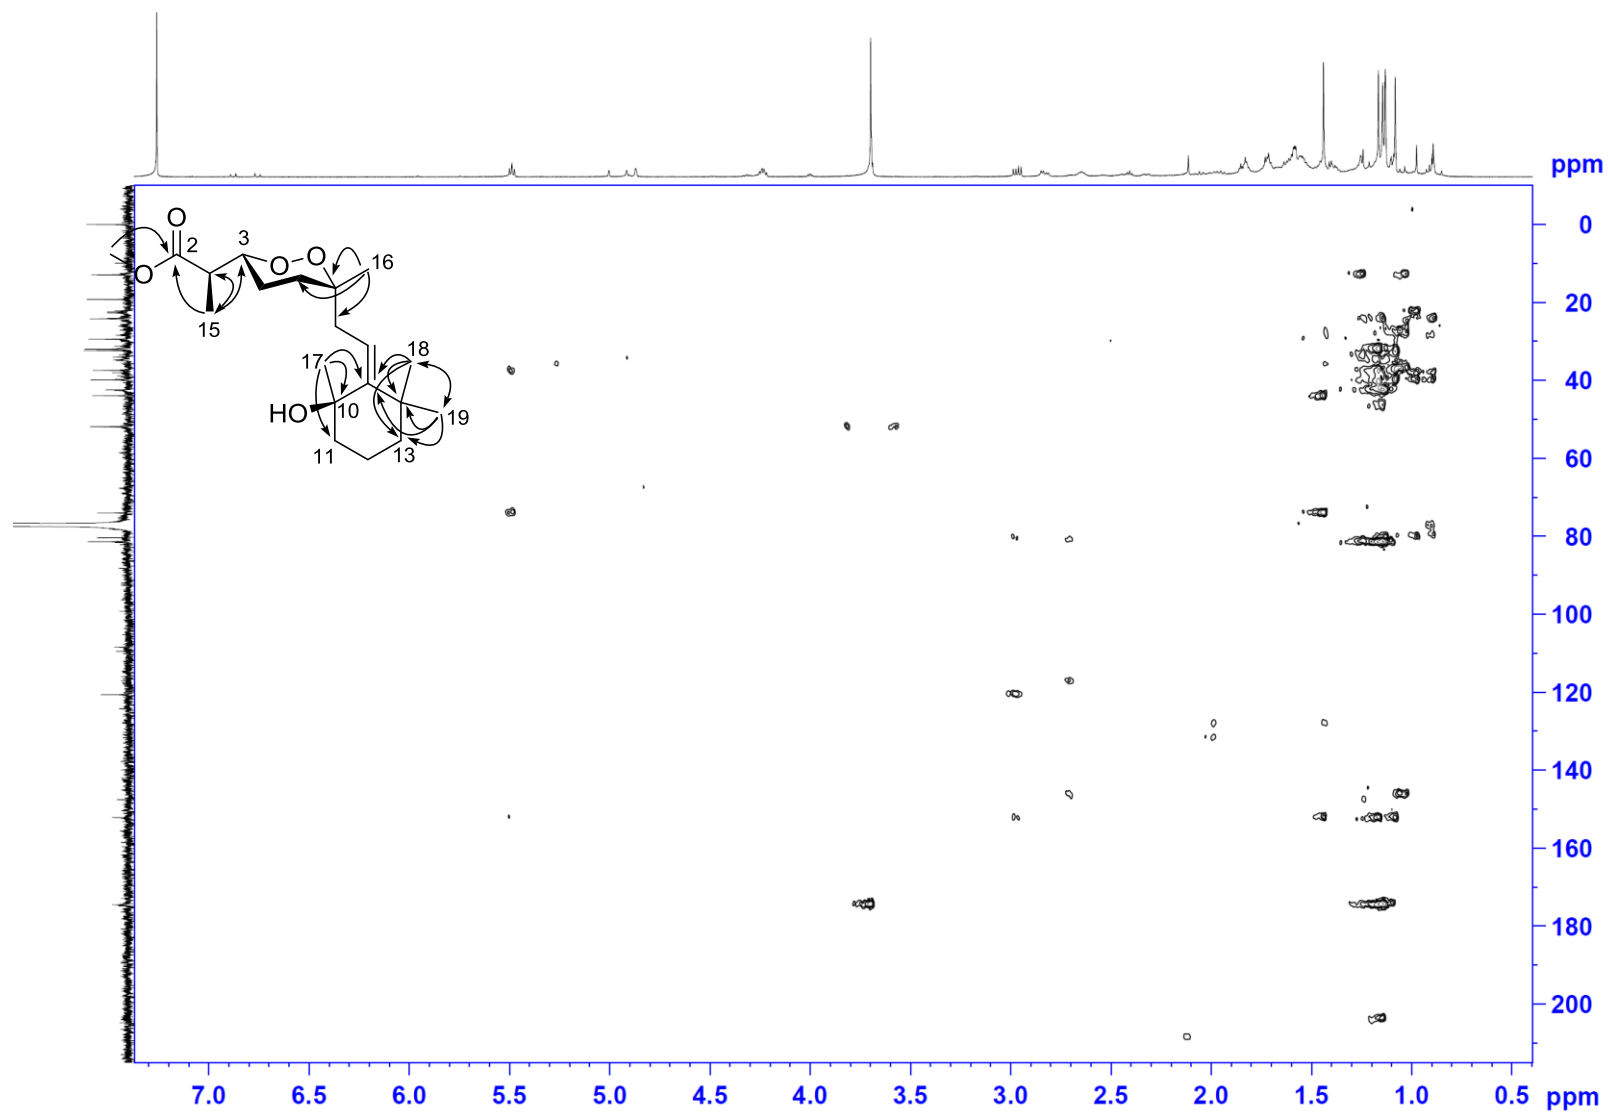

**Figure S40.** NOESY spectrum of diacarpoxide L (**5**) in CDCl<sub>3</sub>.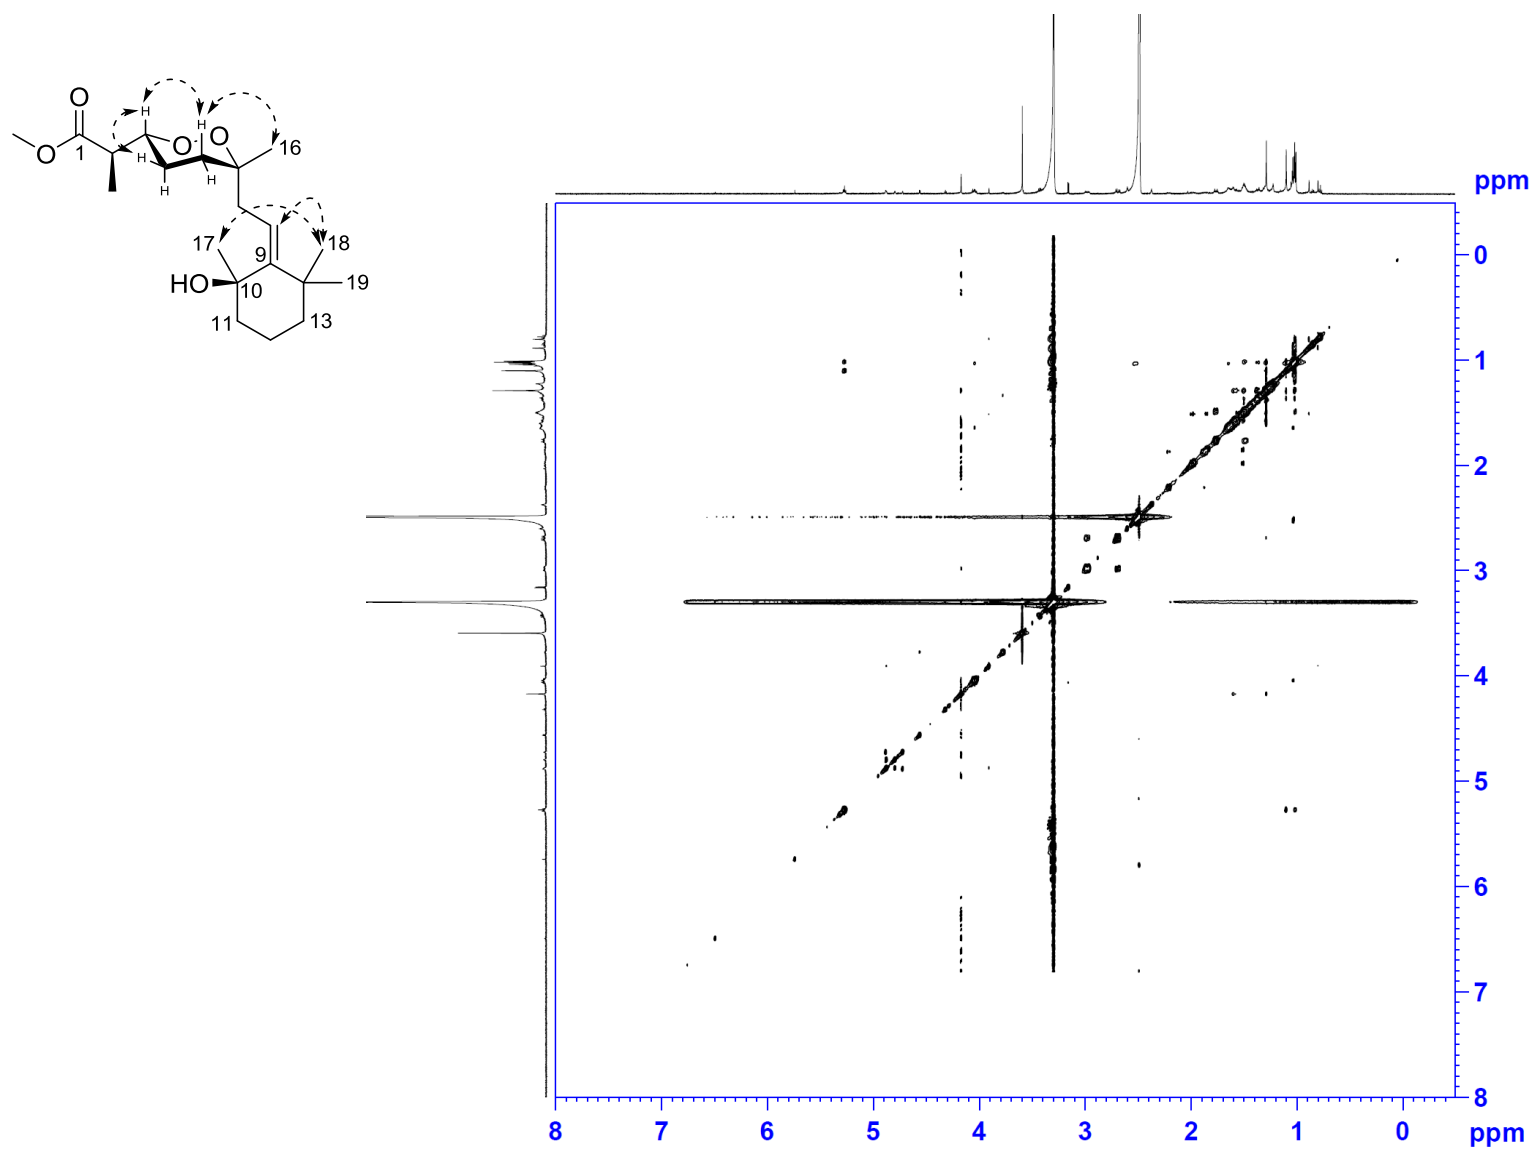

Figure S41. High resolution ESI mass spectrum of diacardiol B (6).

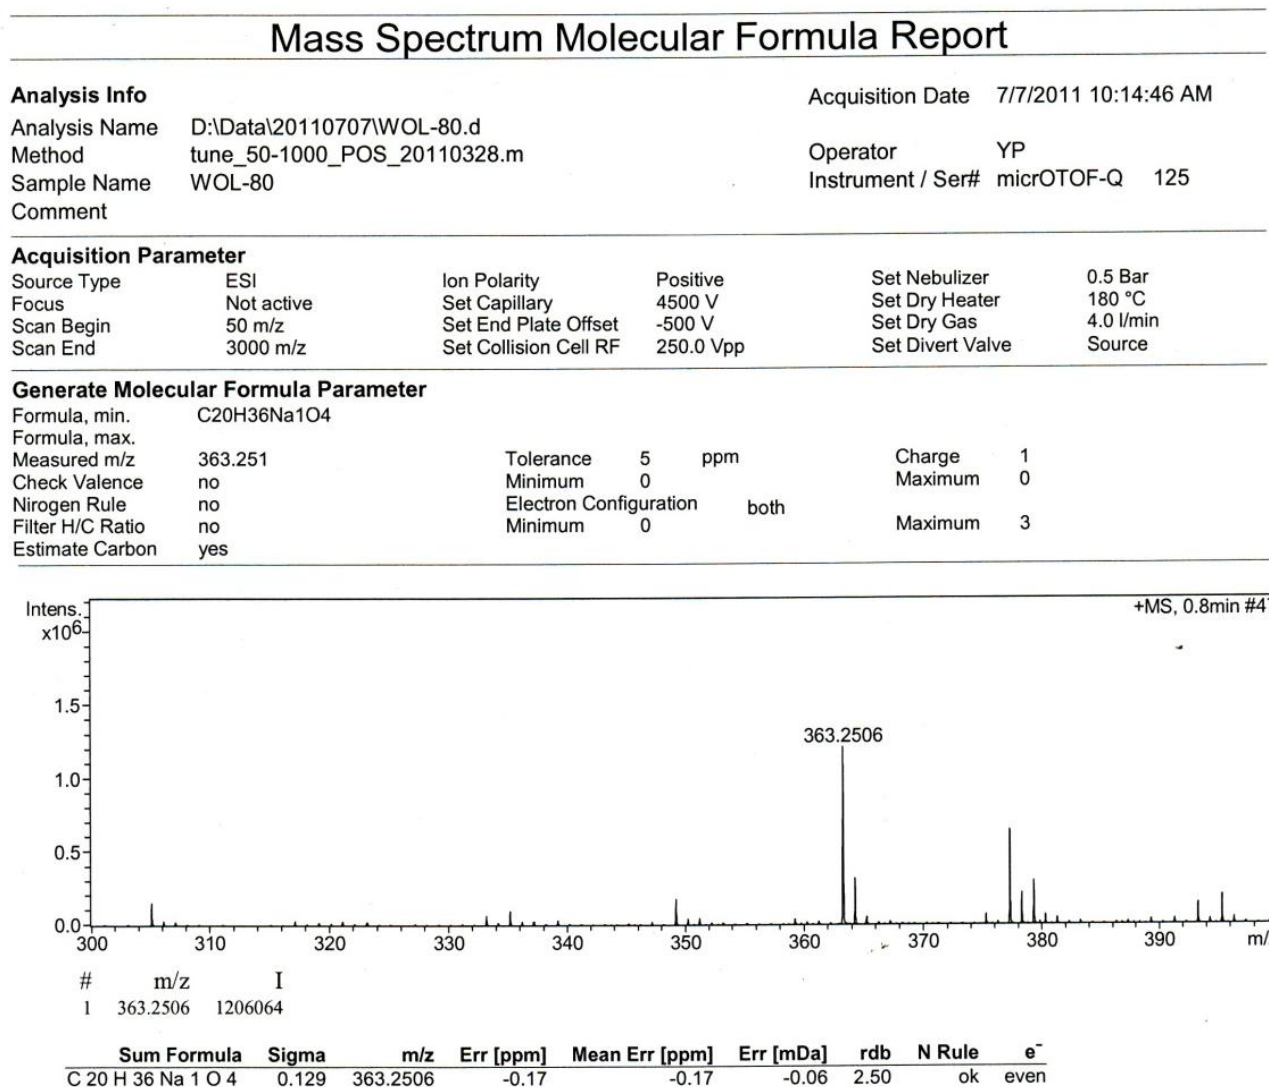

Figure S42. IR spectrum of diacardiol B (6).

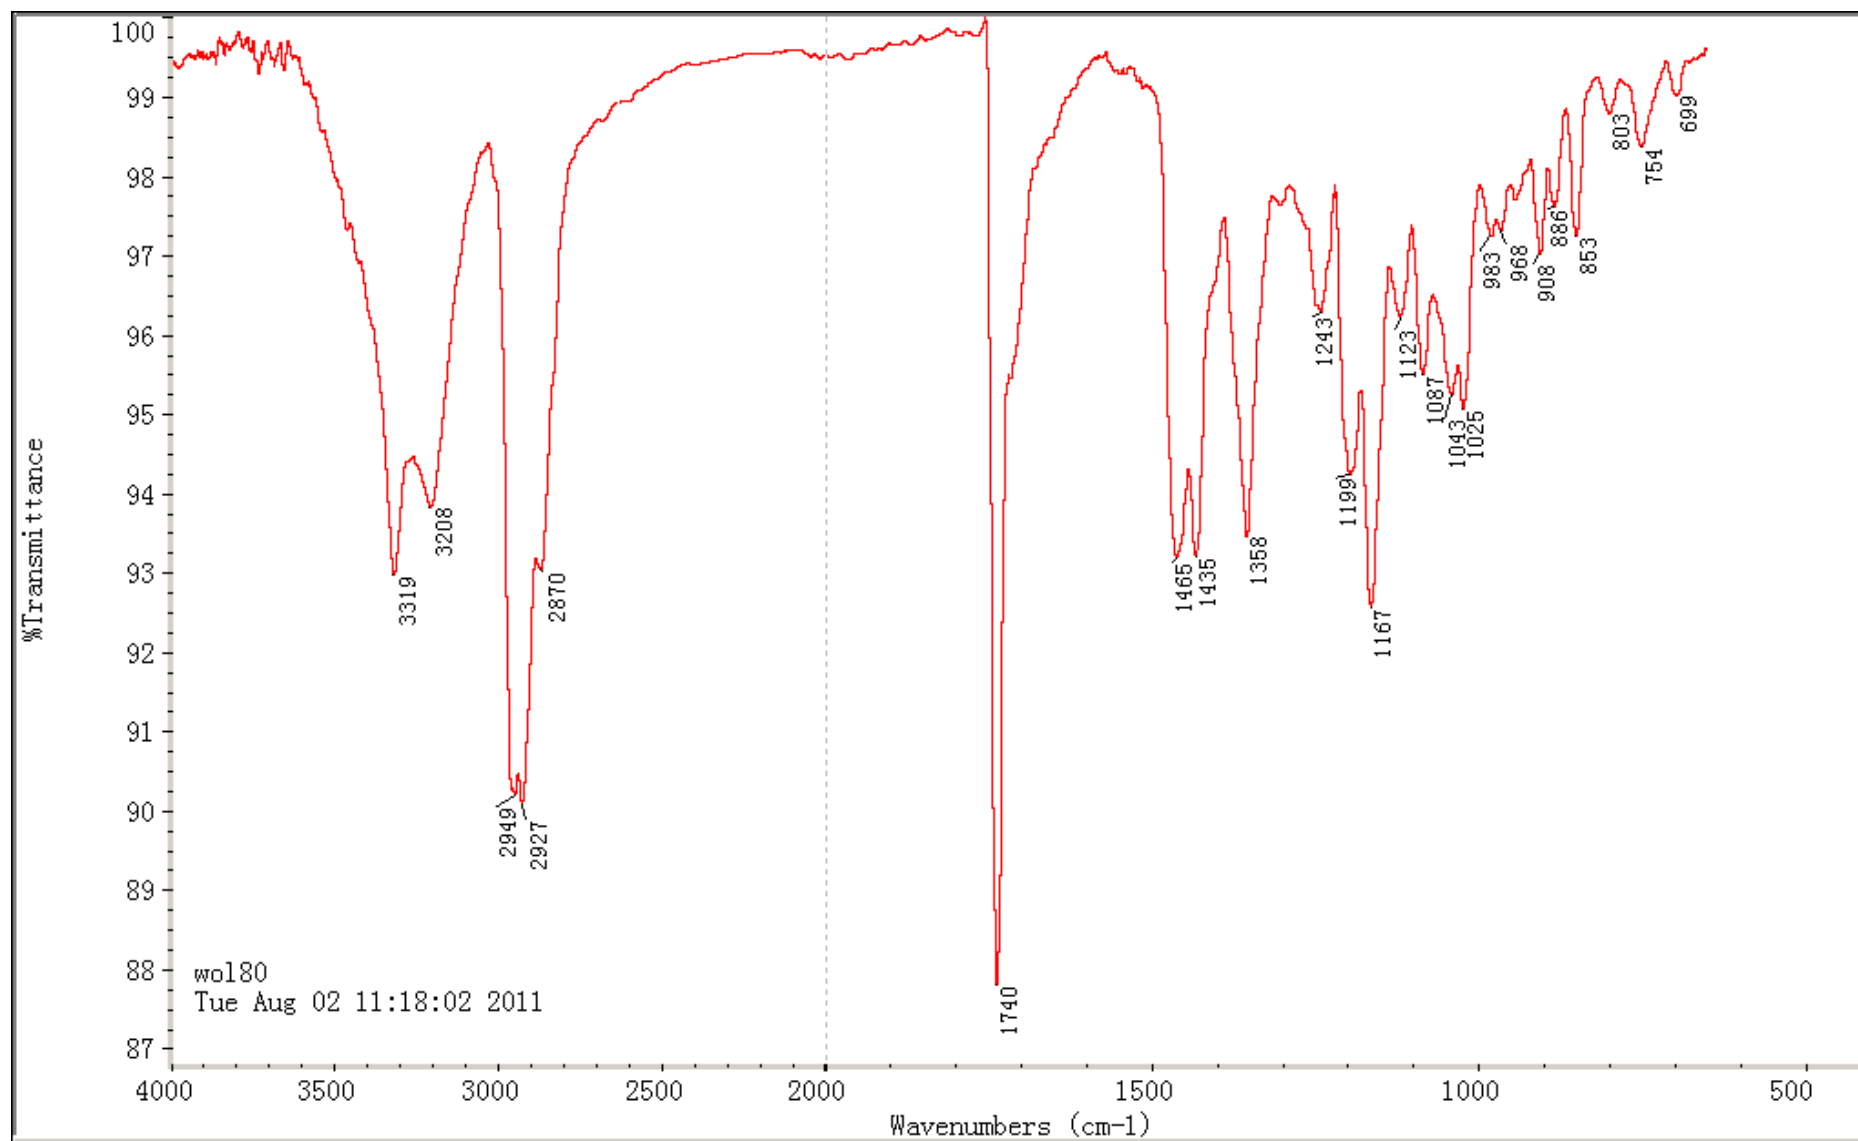

Figure S43.  $^1\text{H}$  NMR spectrum of diacardiol B (6) in  $\text{CDCl}_3$ .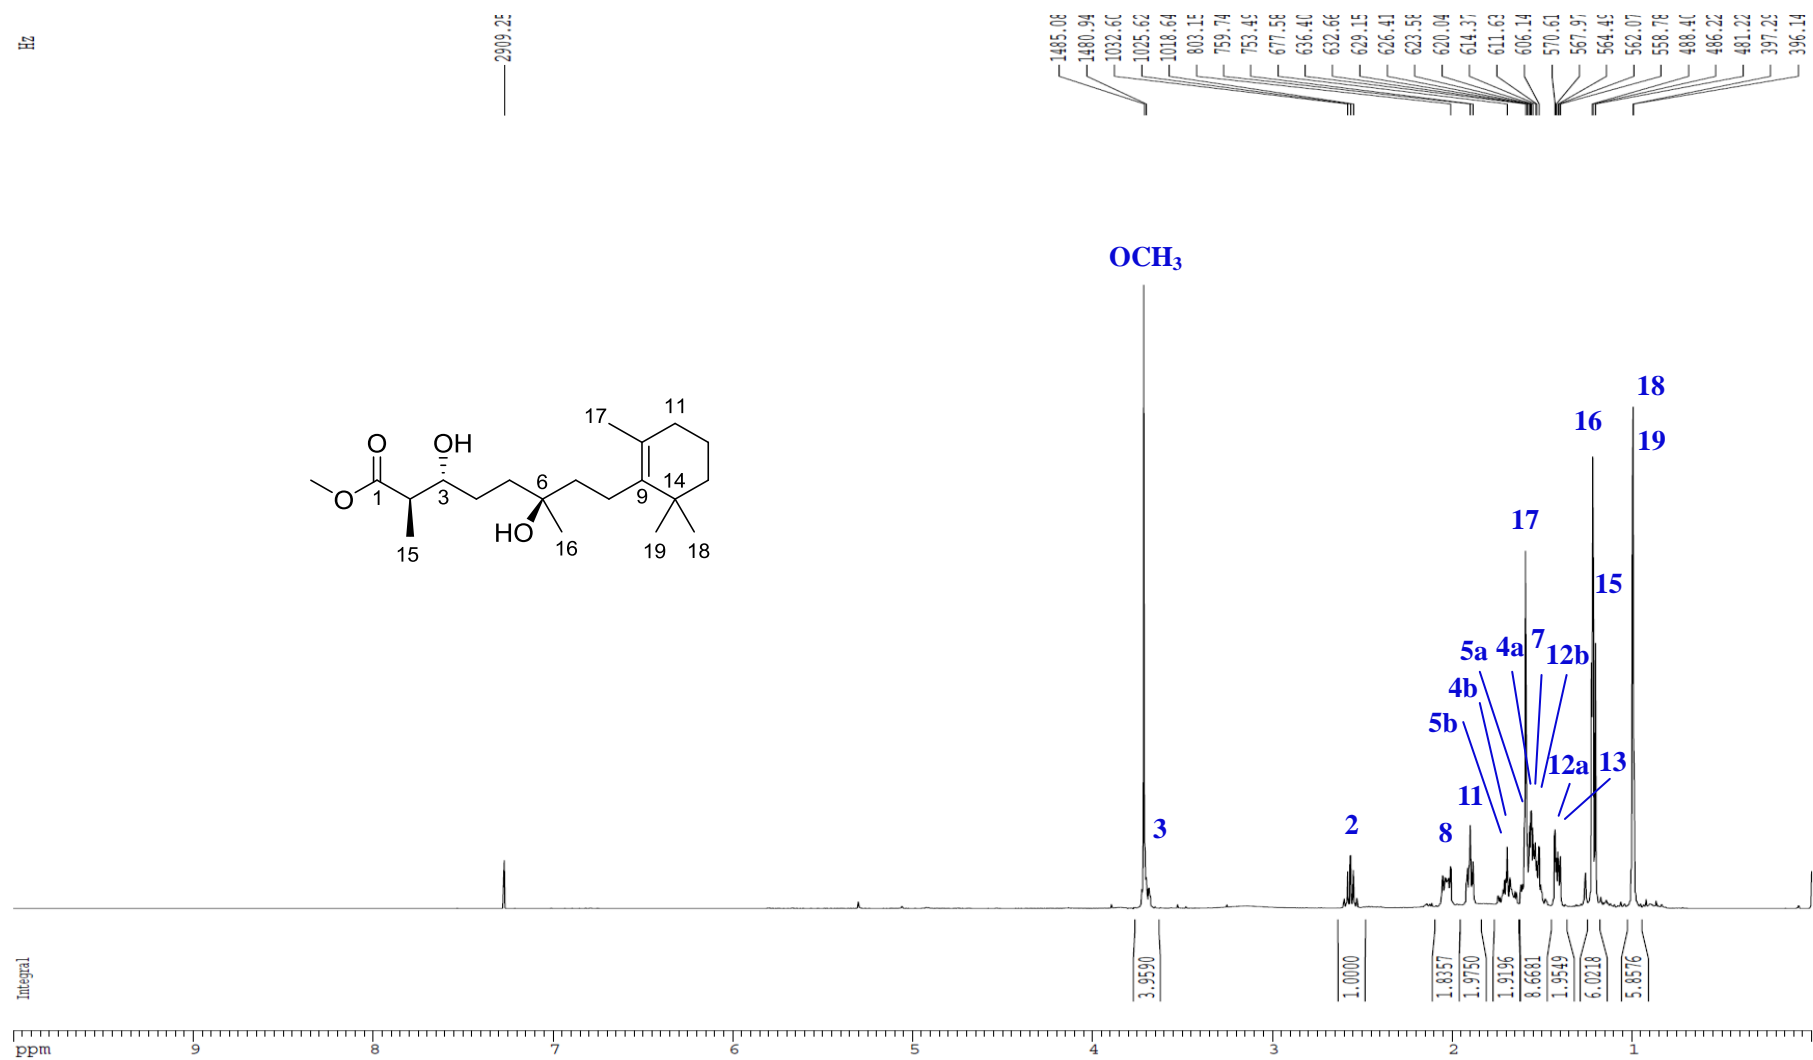

**Figure S44.**  $^{13}\text{C}$  NMR spectrum of diacardiol B (**6**) in  $\text{CDCl}_3$ .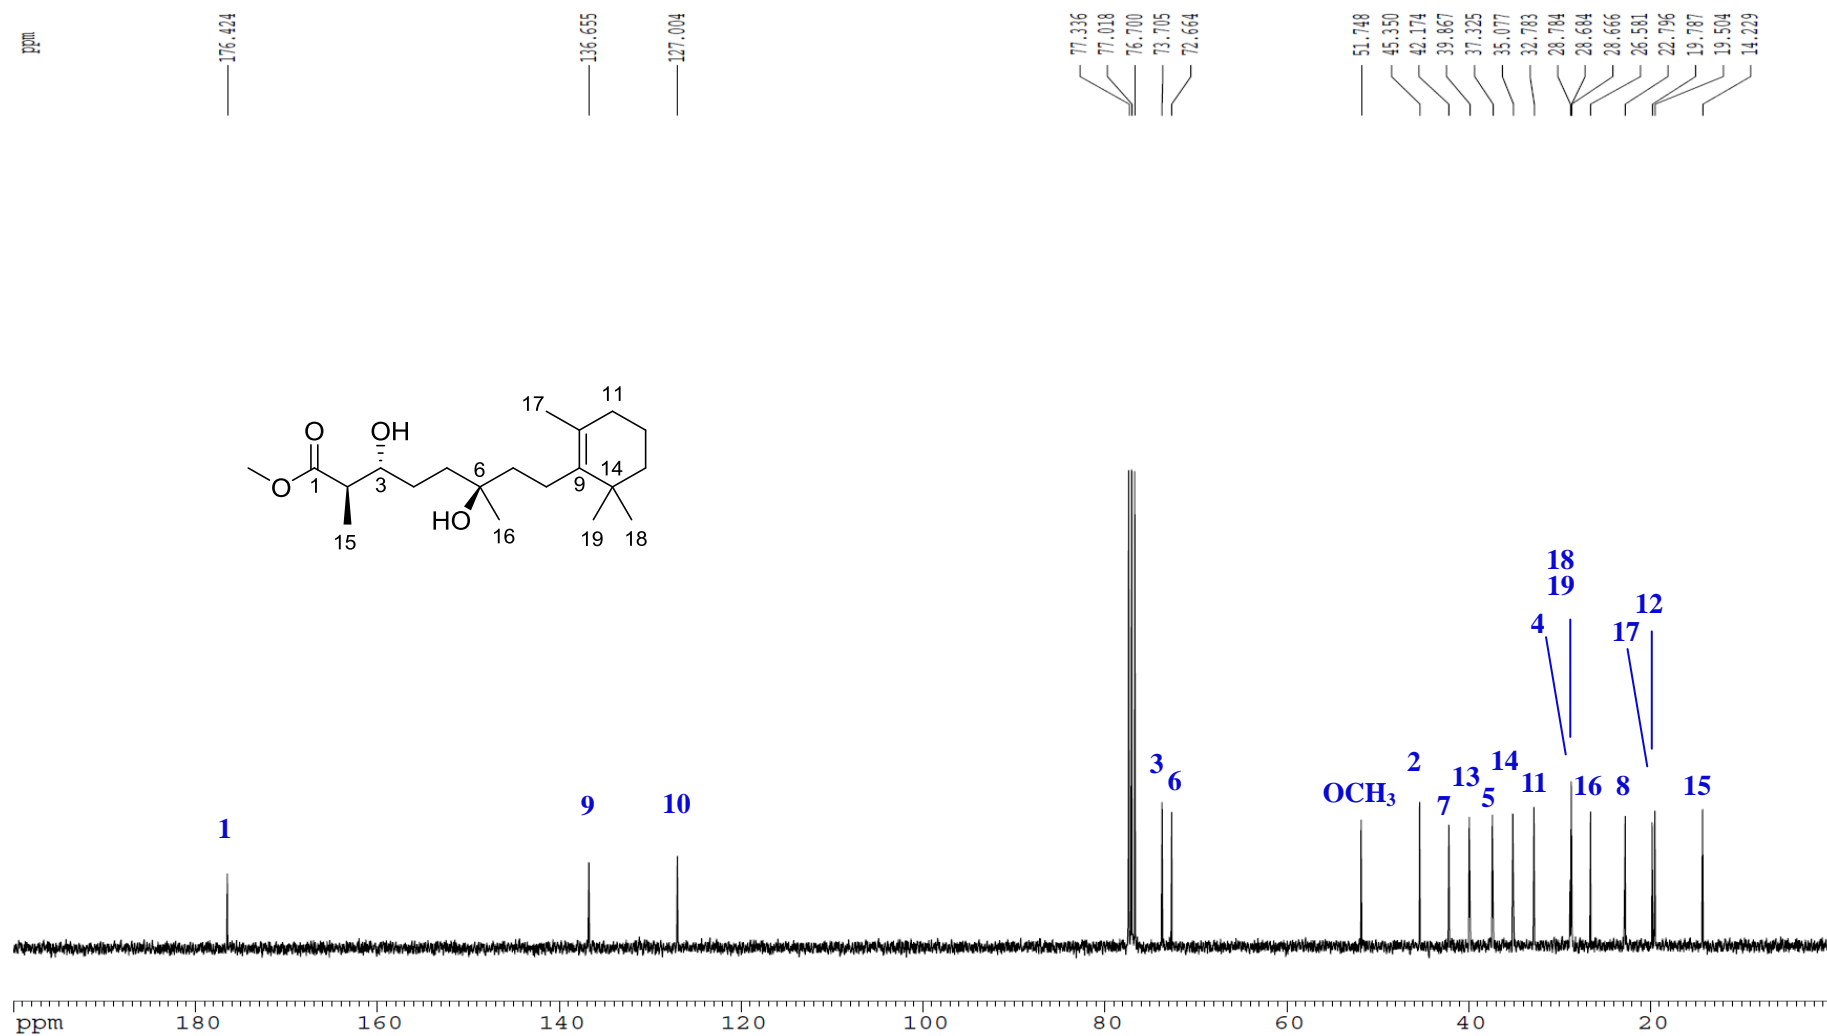

Figure S45.  $^1\text{H}$ - $^1\text{H}$  COSY spectrum of diacardiol B (**6**) in  $\text{CDCl}_3$ .

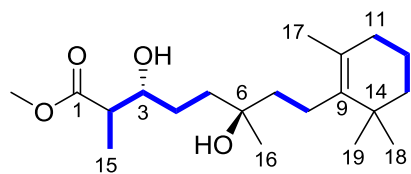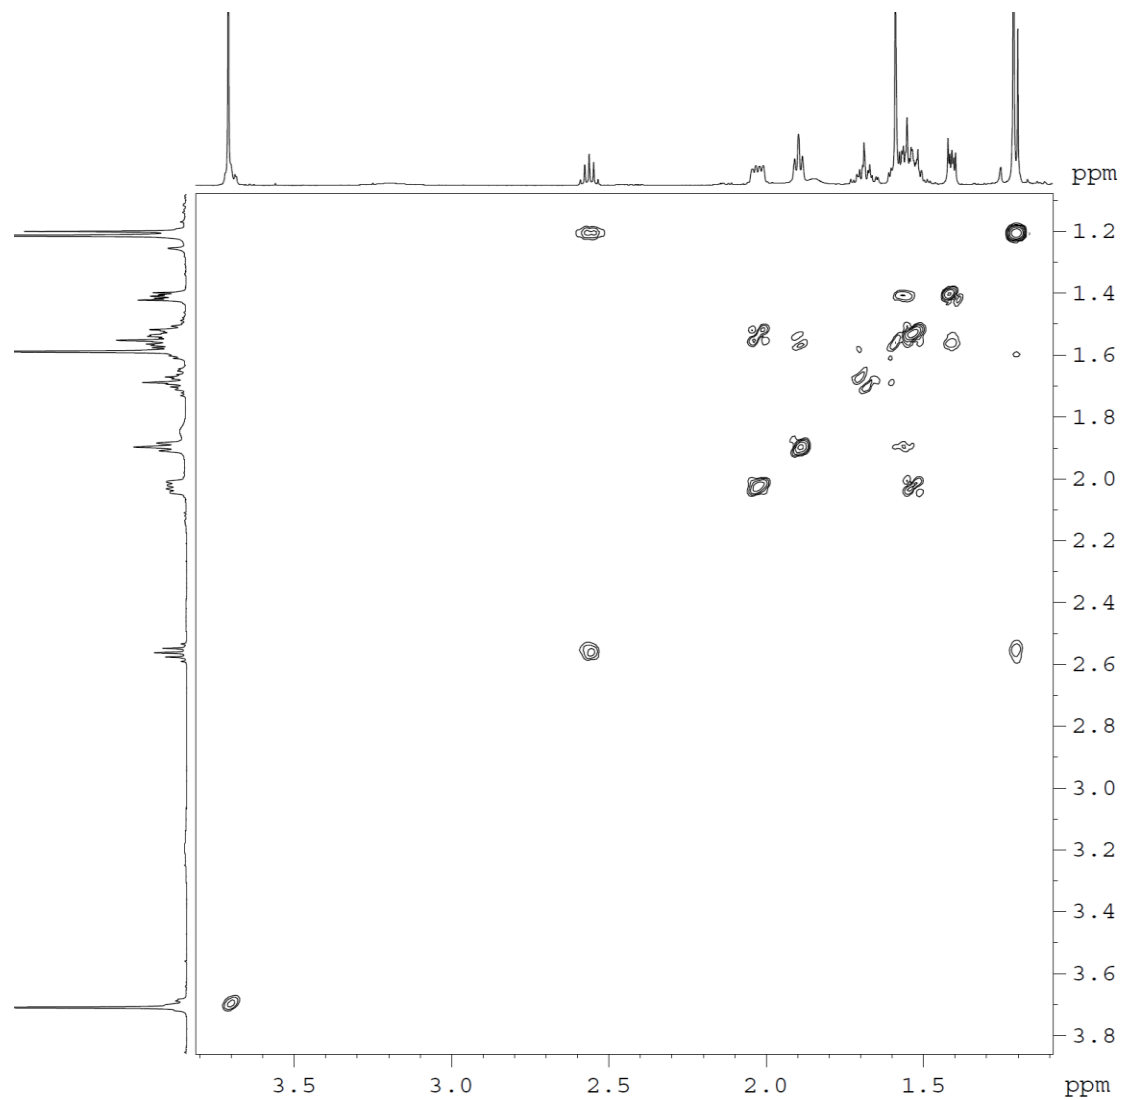

Figure S46. HSQC spectrum of diacardiol B (6) in CDCl<sub>3</sub>.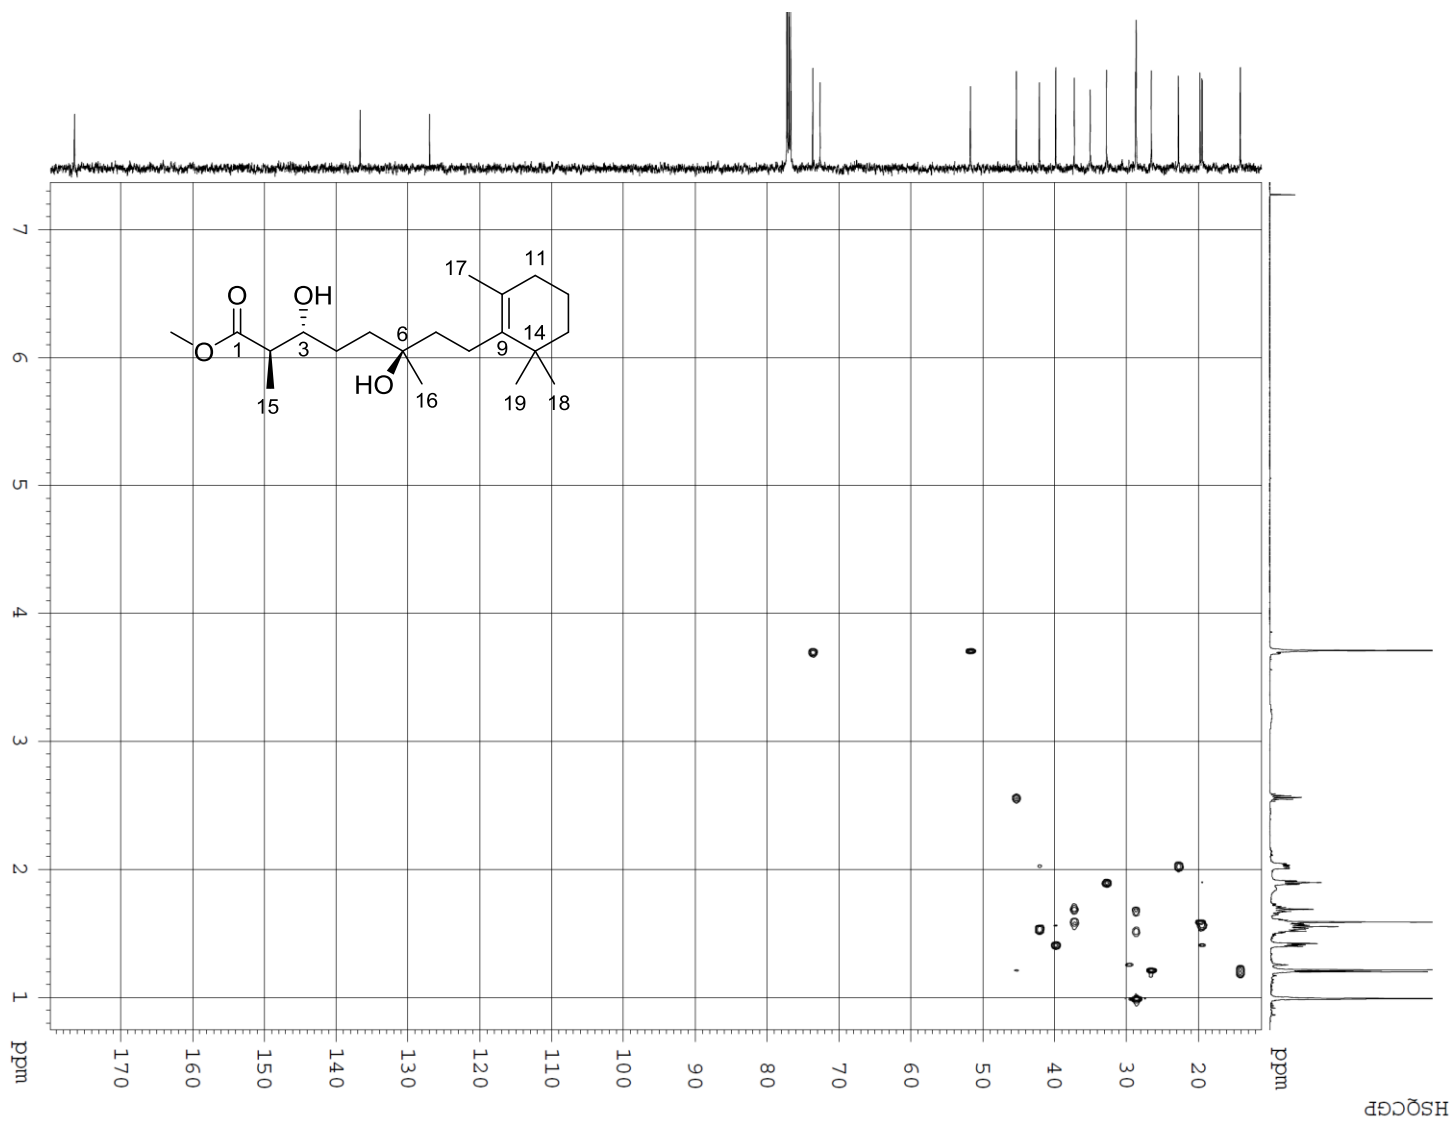



Figure S47. HMBC spectrum of diacardiol B (6) in CDCl<sub>3</sub>.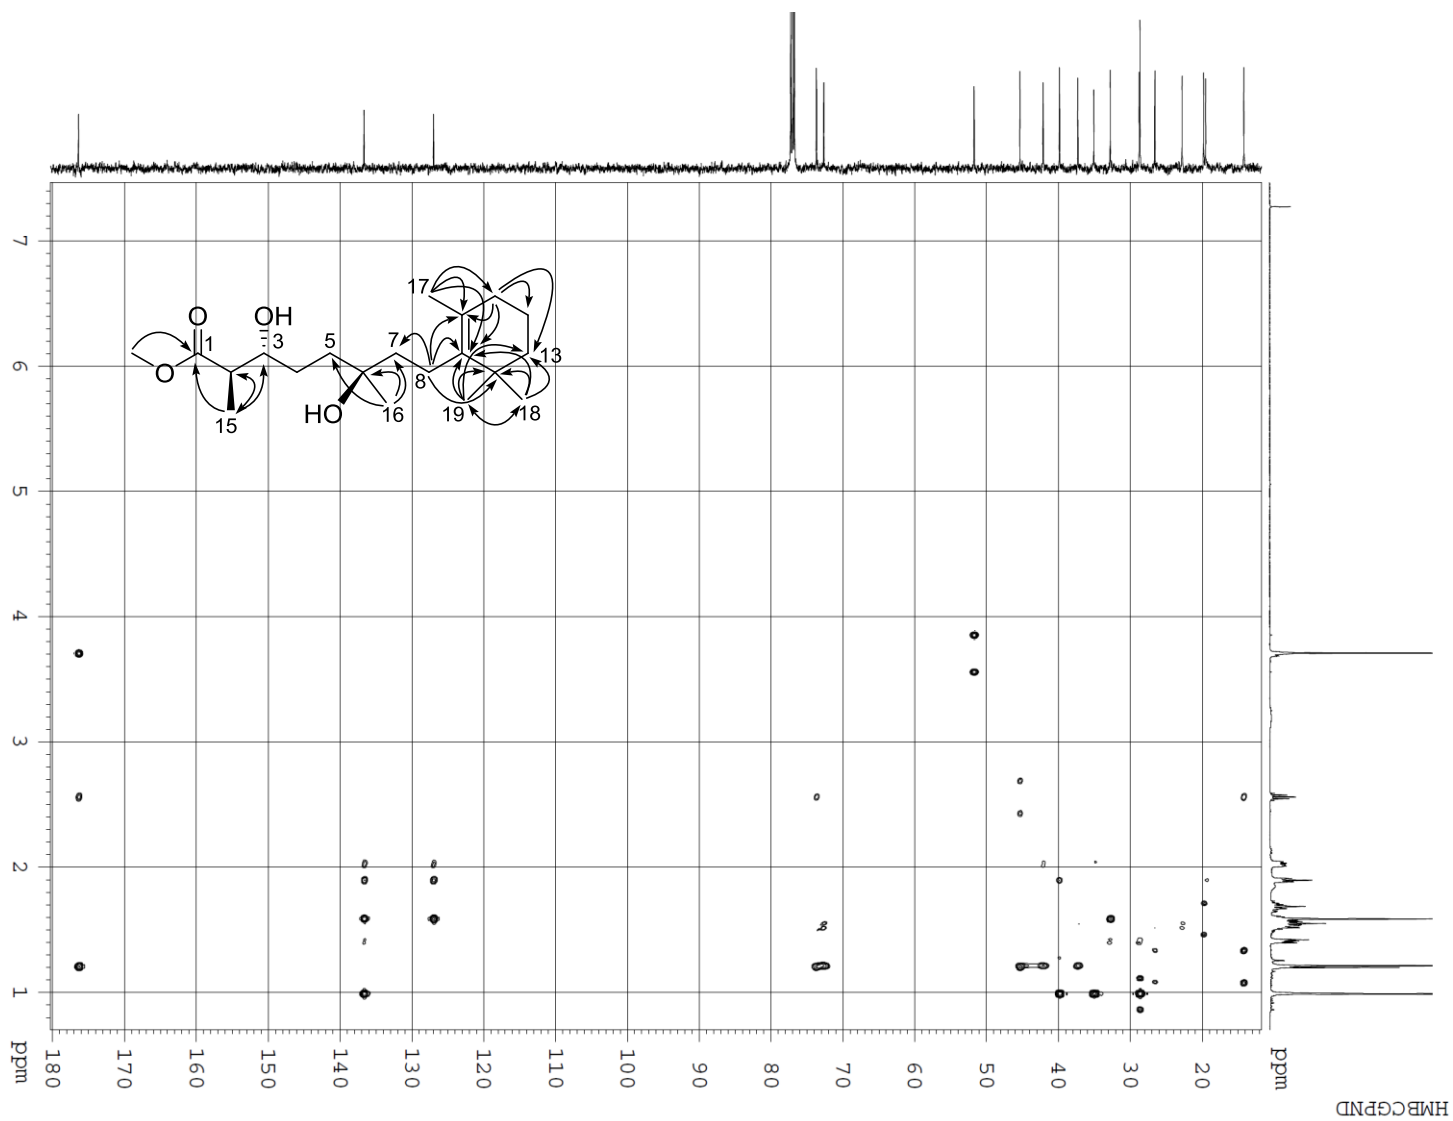

**Figure S48.** NOESY spectrum of diacardiol B (**6**) in CDCl<sub>3</sub>.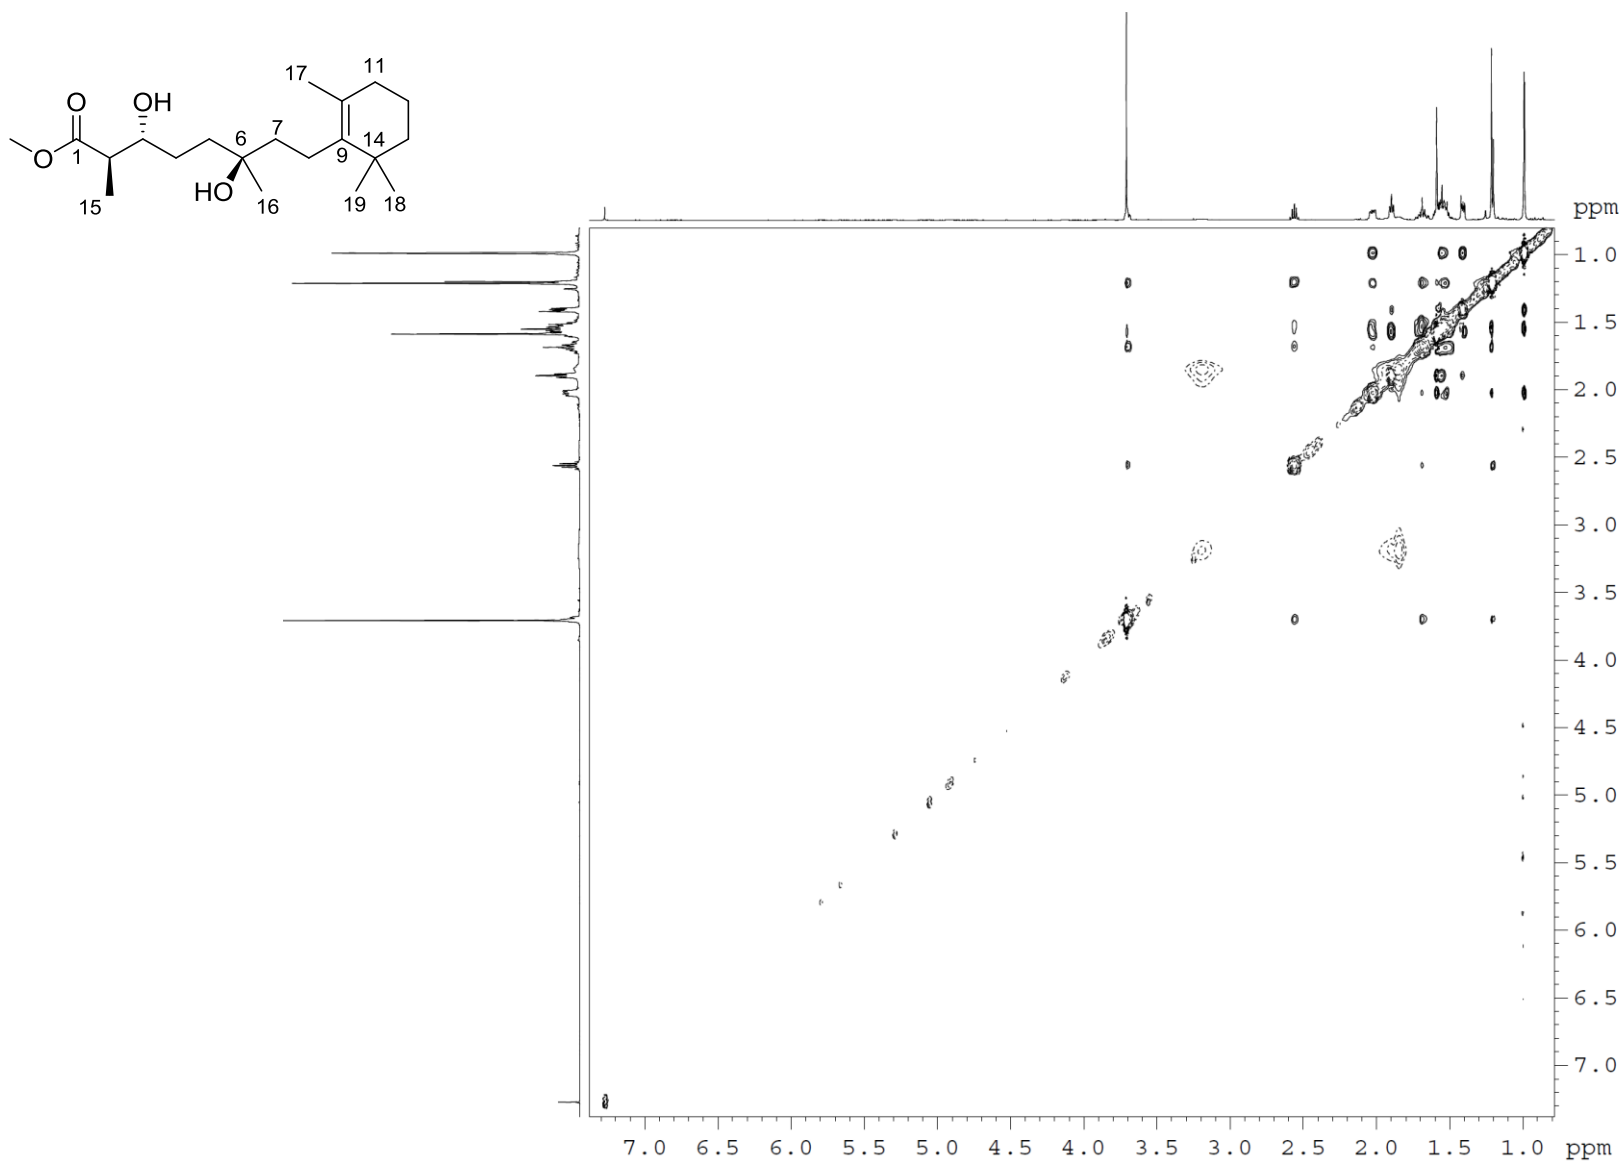

**Figure S49.**  $^1\text{H}$  NMR spectrum of (*S*)-MTPA ester **6a** in  $\text{CDCl}_3$ .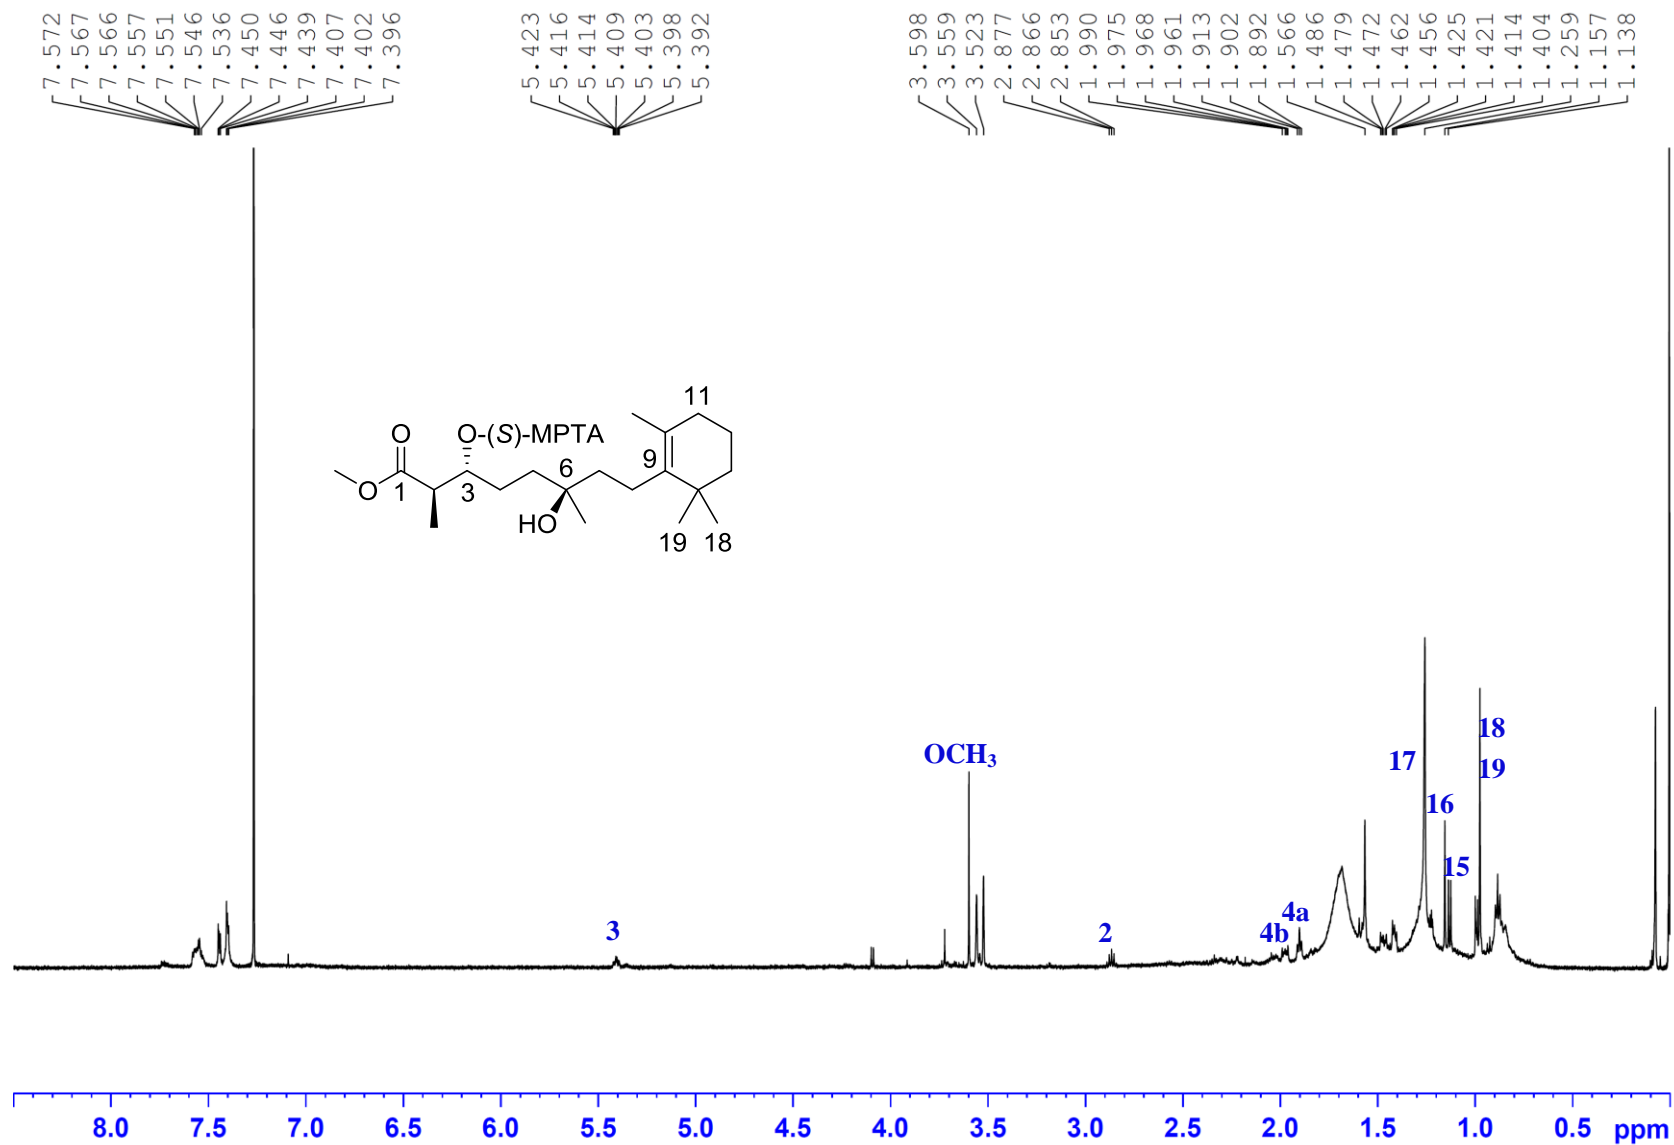

**Figure S50.**  $^1\text{H}$  NMR spectrum of (*R*)-MTPA ester **6b** in  $\text{CDCl}_3$ .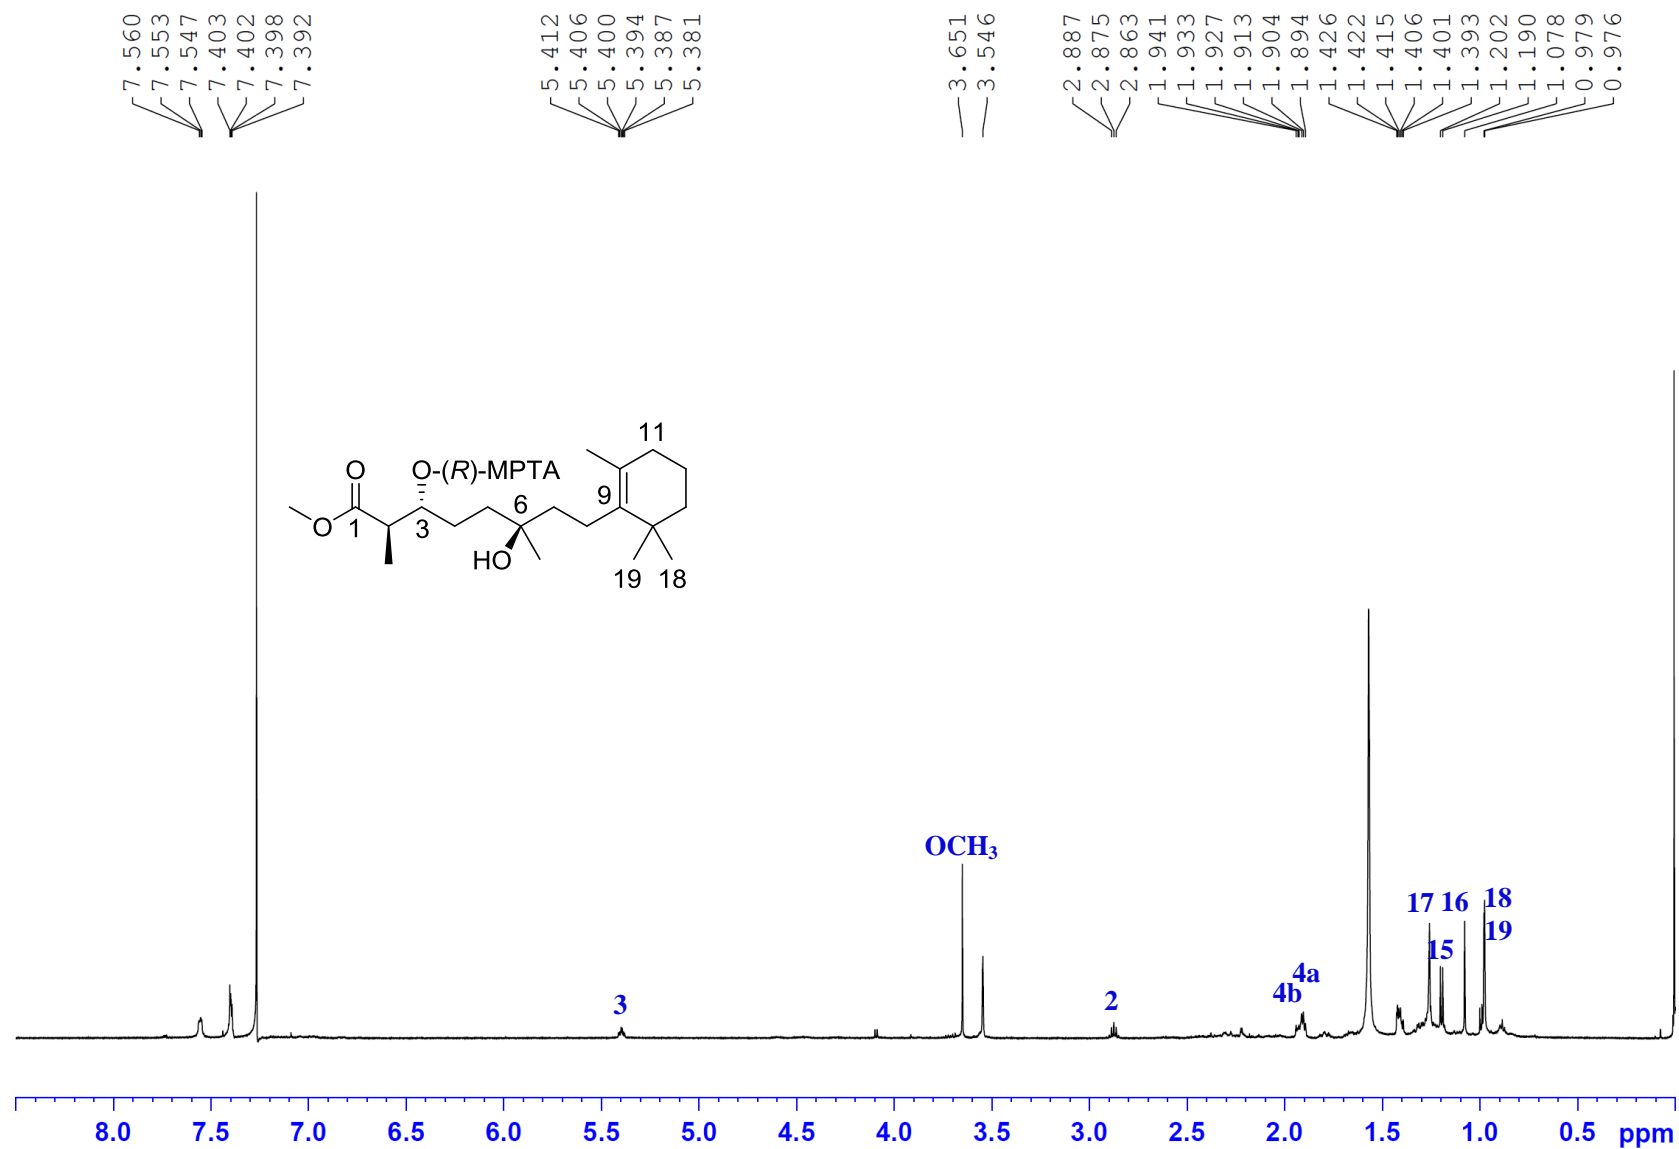

Figure S51.  $^1\text{H}$  NMR spectrum of diol derived from nuapapu A methyl ester in  $\text{CDCl}_3$ .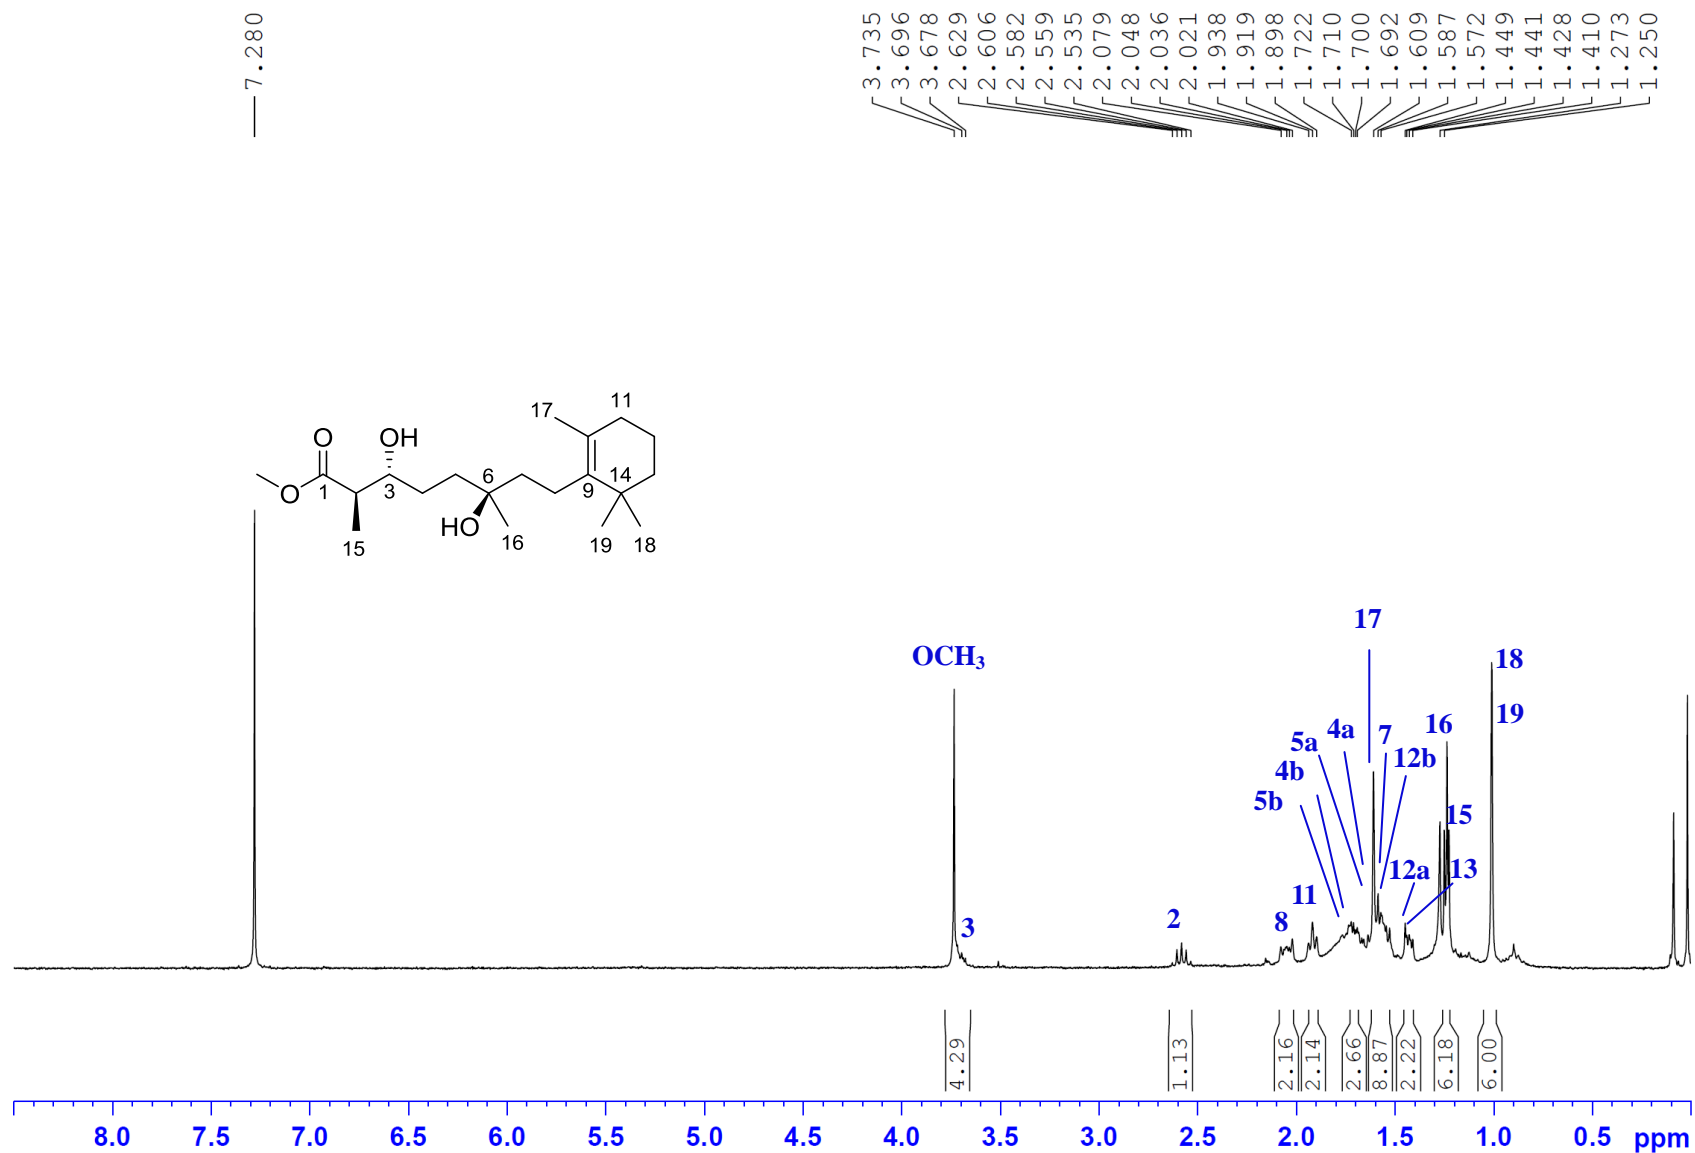

**Sections 2.** Computation procedure and computational data

Energy minimized structures were used for the DFT calculations applying the PCM solvation models with the dielectric constant representing MeCN or DCM by using Gaussian 09 program. Low energy conformations were optimized by using B3LYP/6-31G(d,p) or MPWLPW91/6-31G(d,p) method applying the PCM solvation model, and the frequency calculations were performed at the same theoretical levels to verify true energy minimal located and generate sets of thermodynamic data at standard condition. The optimized geometries were used for TDDFT calculations at B3LYP/6-31G(d,p) level applying the same solvation model. The generated excitation energies and rotational strengths were Boltzmann averaged and then fitted to Gaussian functions to generate computed ECD spectra normalized and overlaid with the experimental spectra for comparison. The NMR calculations were performed by using the GIAO method at B3LYP/6-31G(d,p) and MPWLPW91/6-31G(d,p) level respectively, and the calculated chemical shifts for TMS at the corresponding theoretical levels were used as the references.

**Figure S52.** Dominate conformations of compounds 1–5.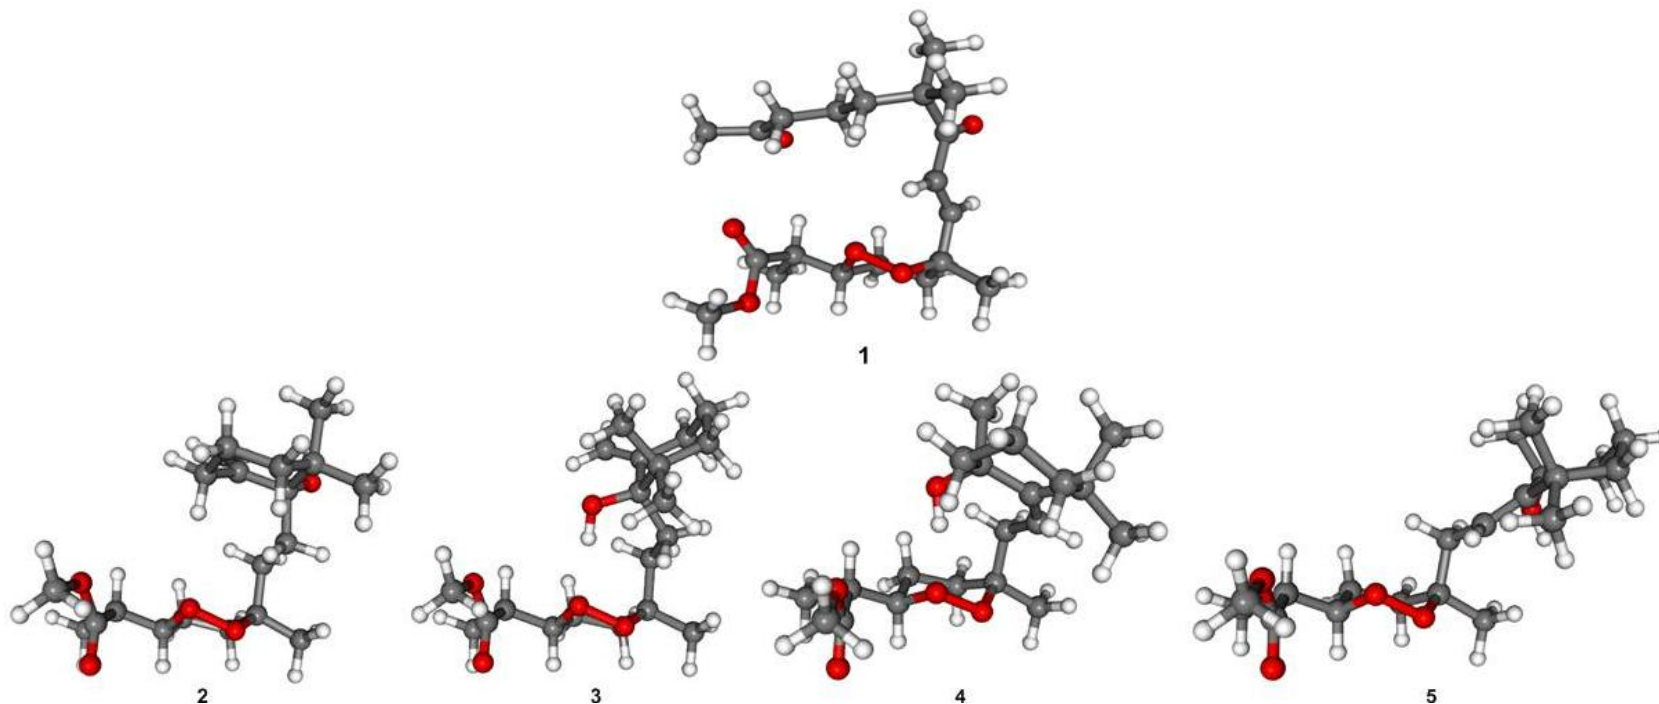

**Figure S53.** Calculated ECD spectra of low energy conformations of **1** at B3LYP/6-31G(d,p) level applying the PCM solvation model (MeCN).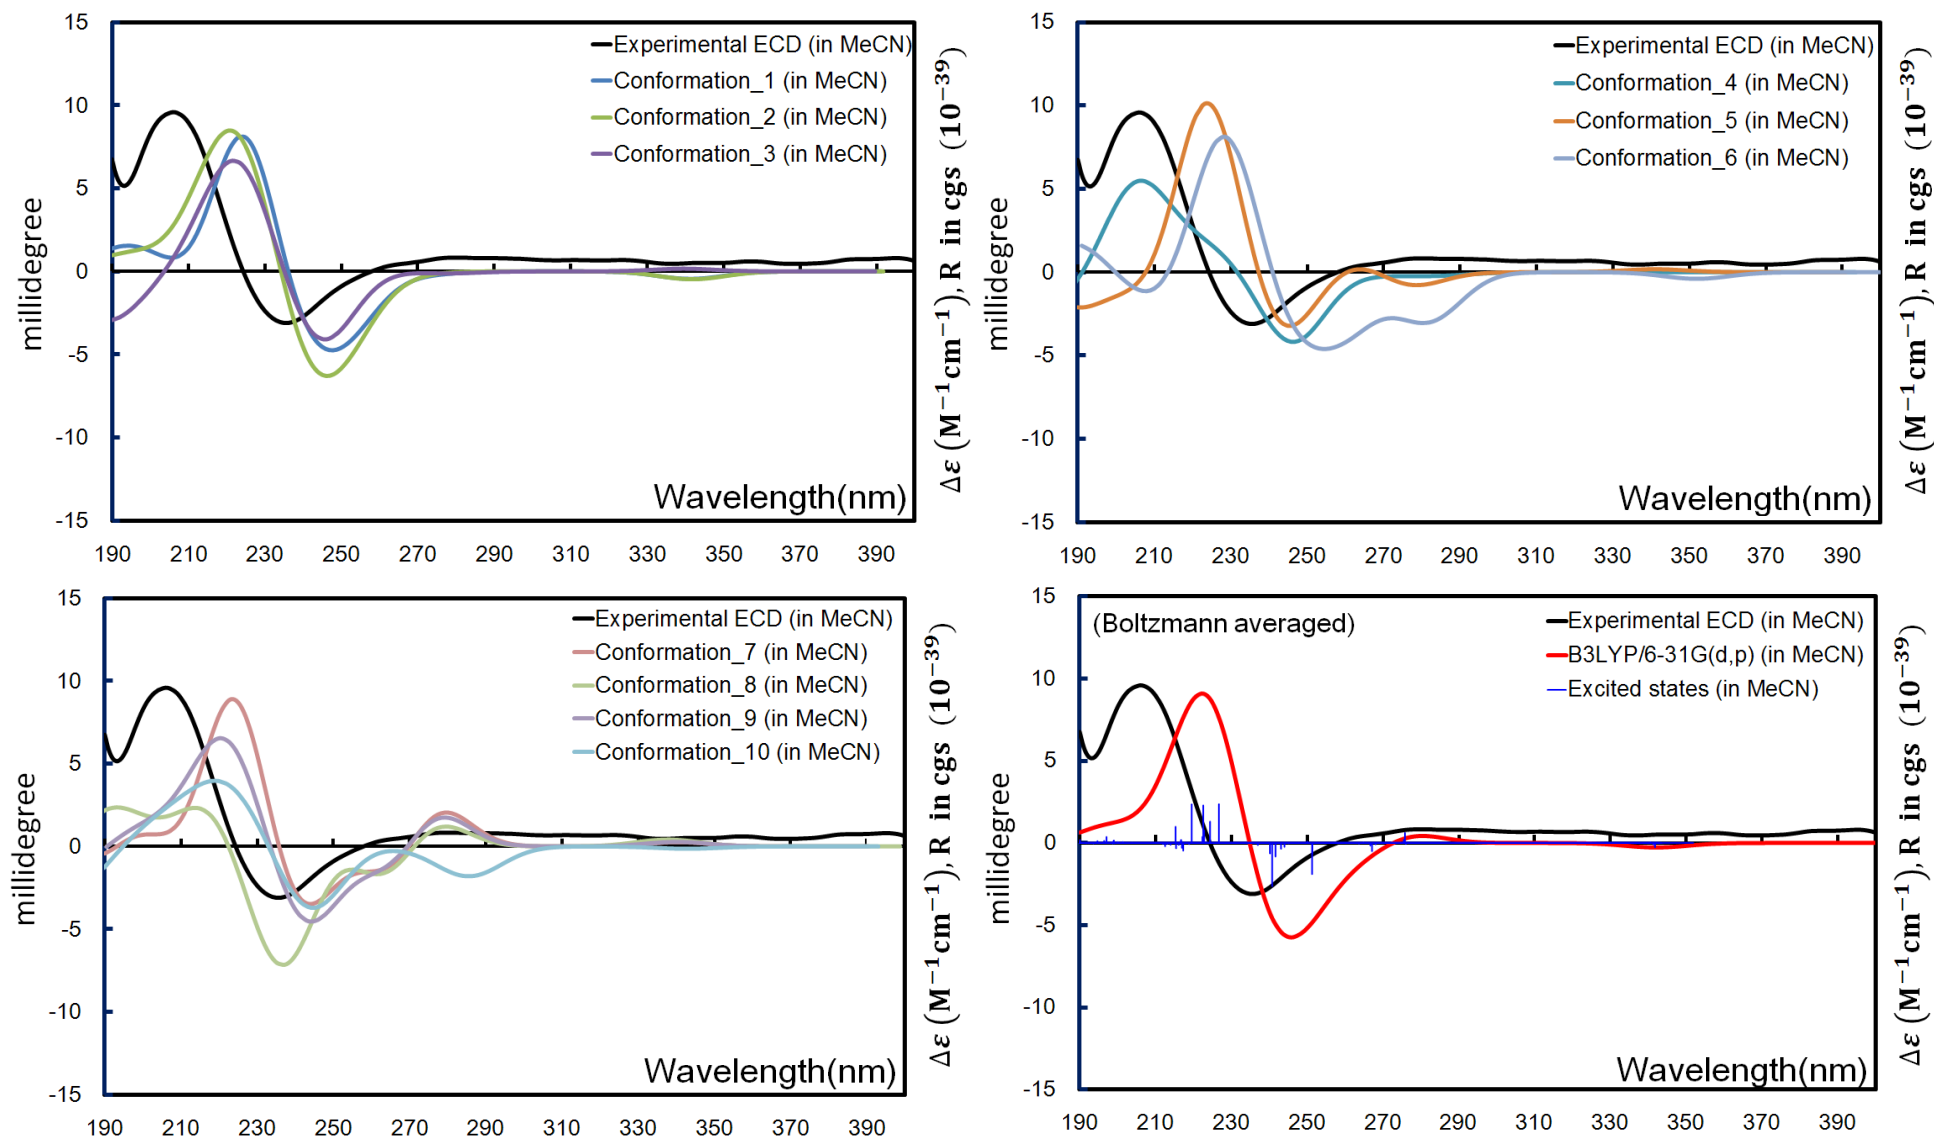

**Figure S54.** Calculated ECD spectra of low energy conformations of **2** at B3LYP/6-31G(d,p) level applying the PCM solvation model (MeCN).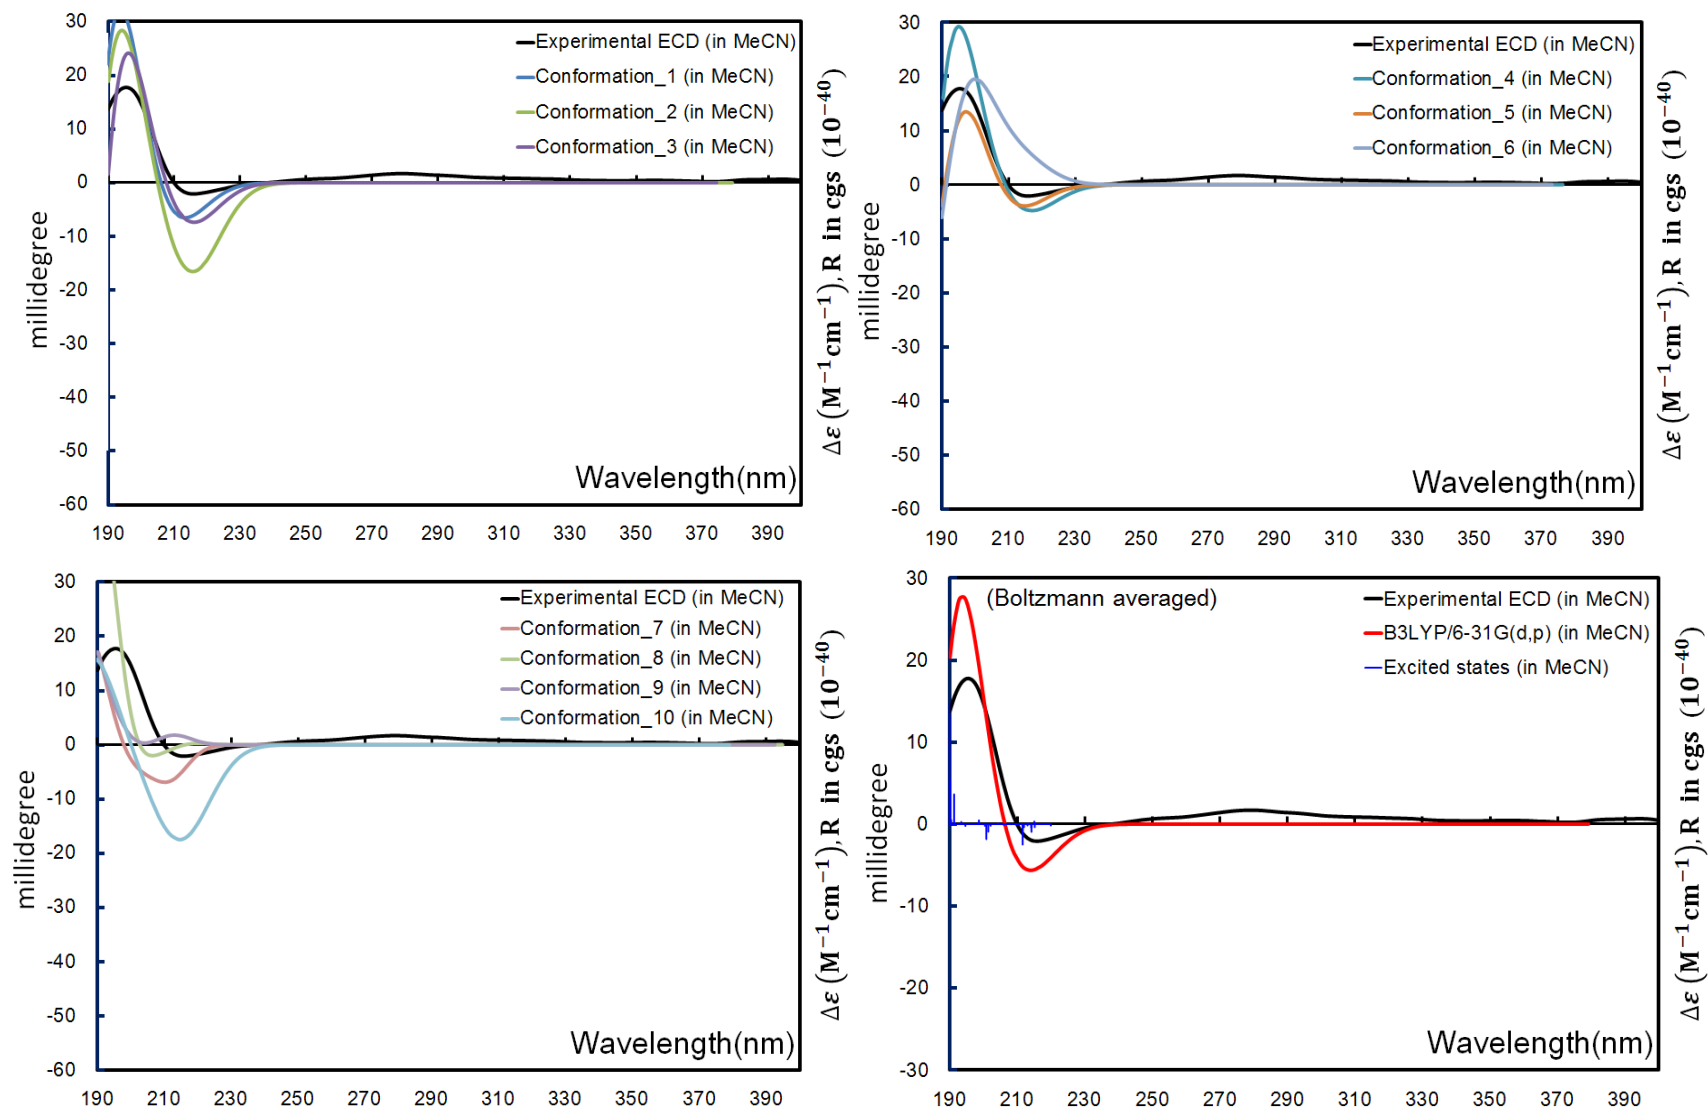



**Figure S55.** Calculated ECD spectra of low energy conformations of **3** at B3LYP/6-31G(d,p) level applying the PCM solvation model (MeCN).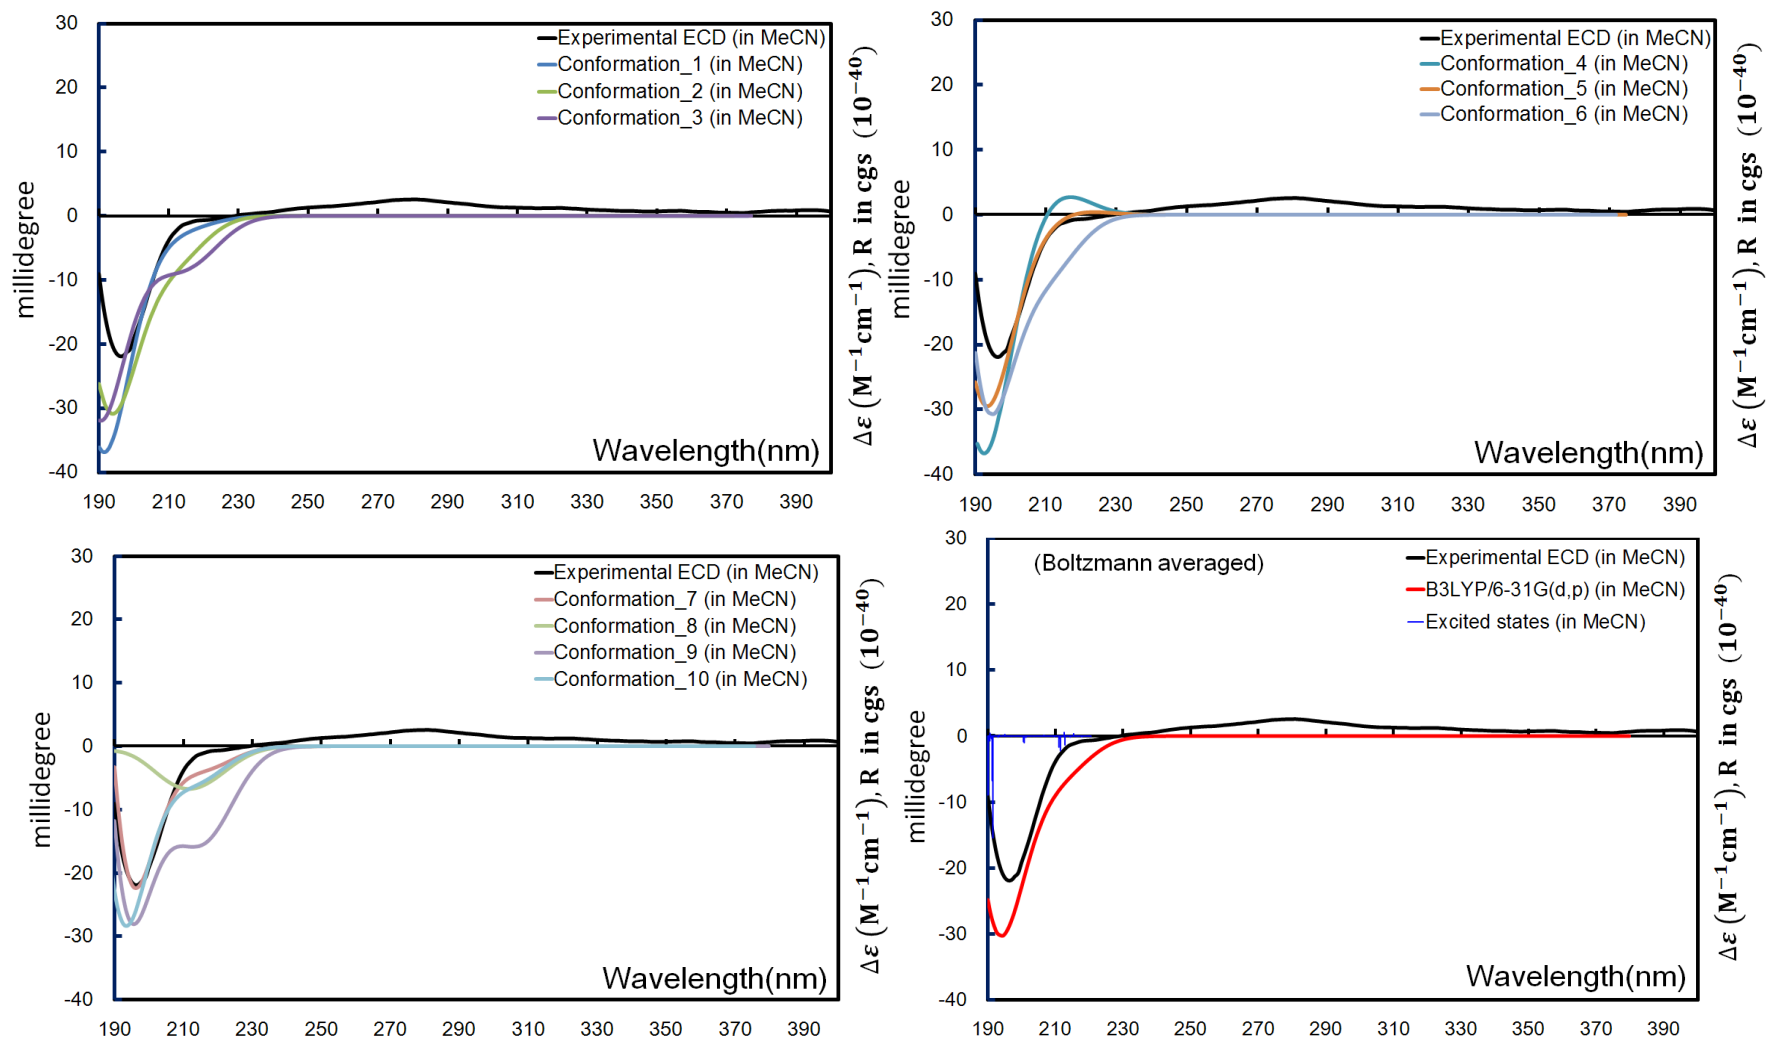

**Figure S56.** Calculated ECD spectra of low energy conformations of **4** at B3LYP/6-31G(d,p) level applying the PCM solvation model (MeCN).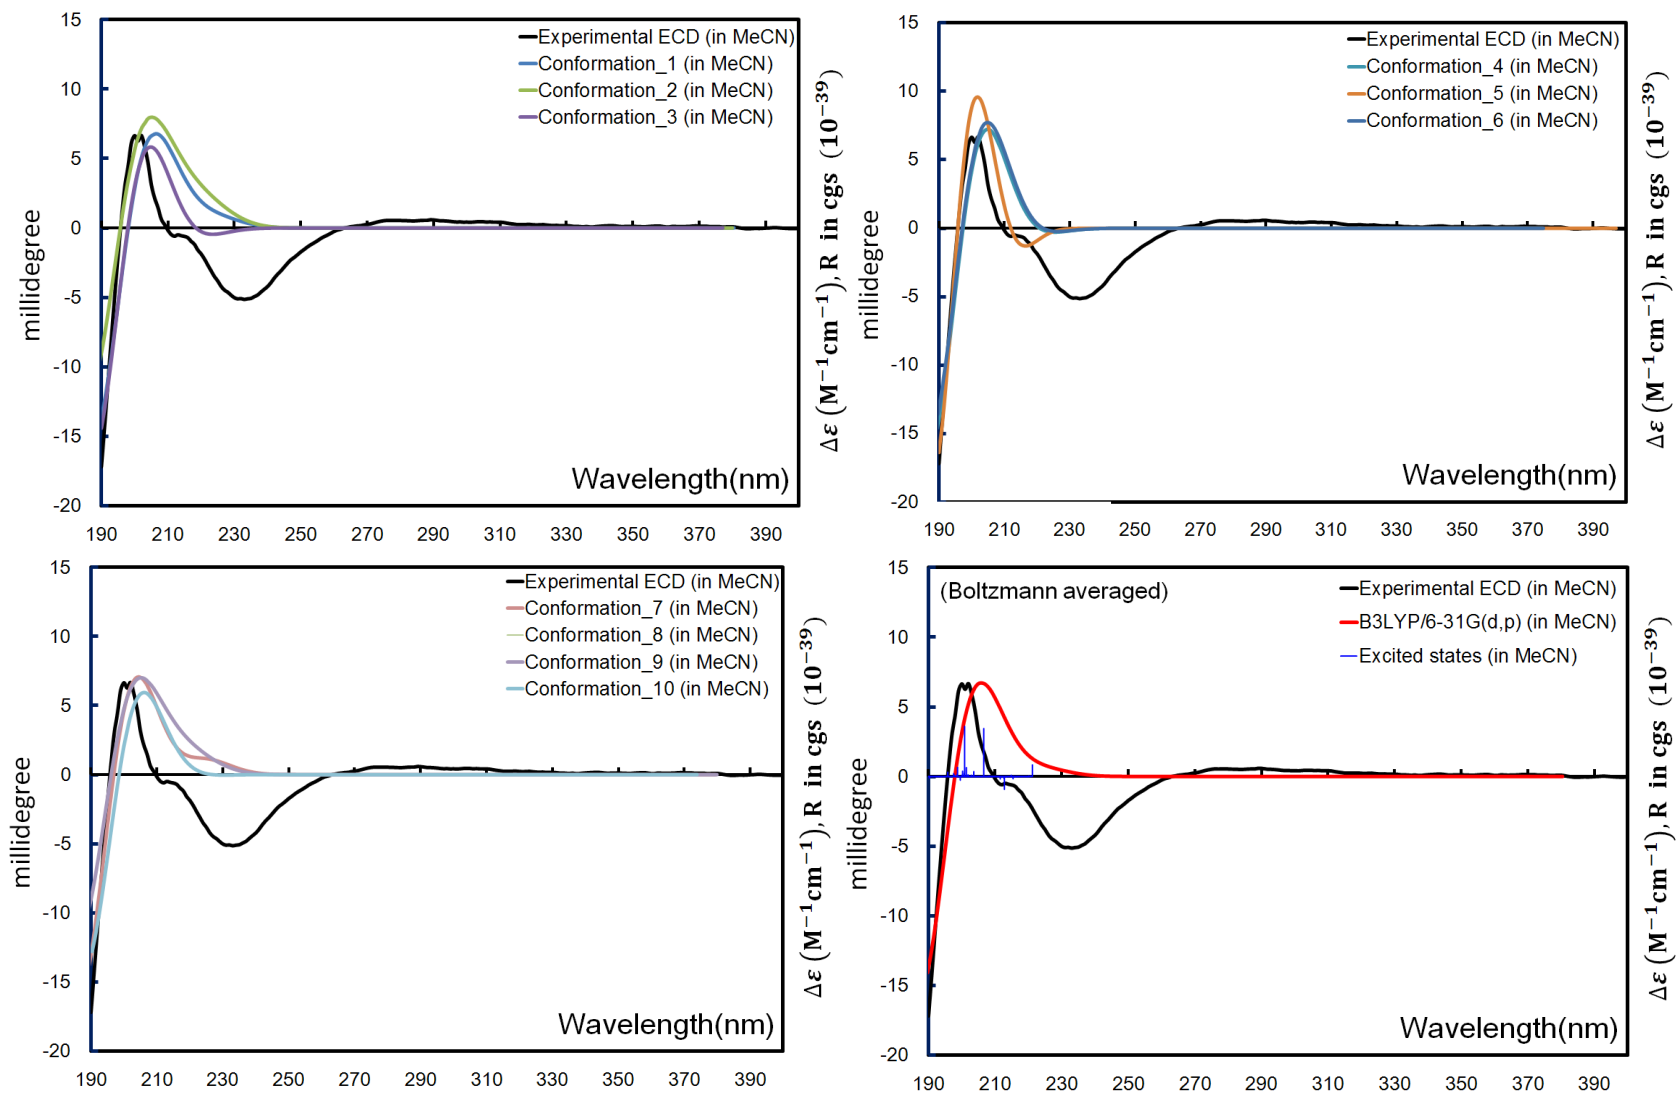

**Figure S57.** Calculated ECD spectra of low energy conformations of **5** at B3LYP/6-31G(d,p) level applying the PCM solvation model (MeCN).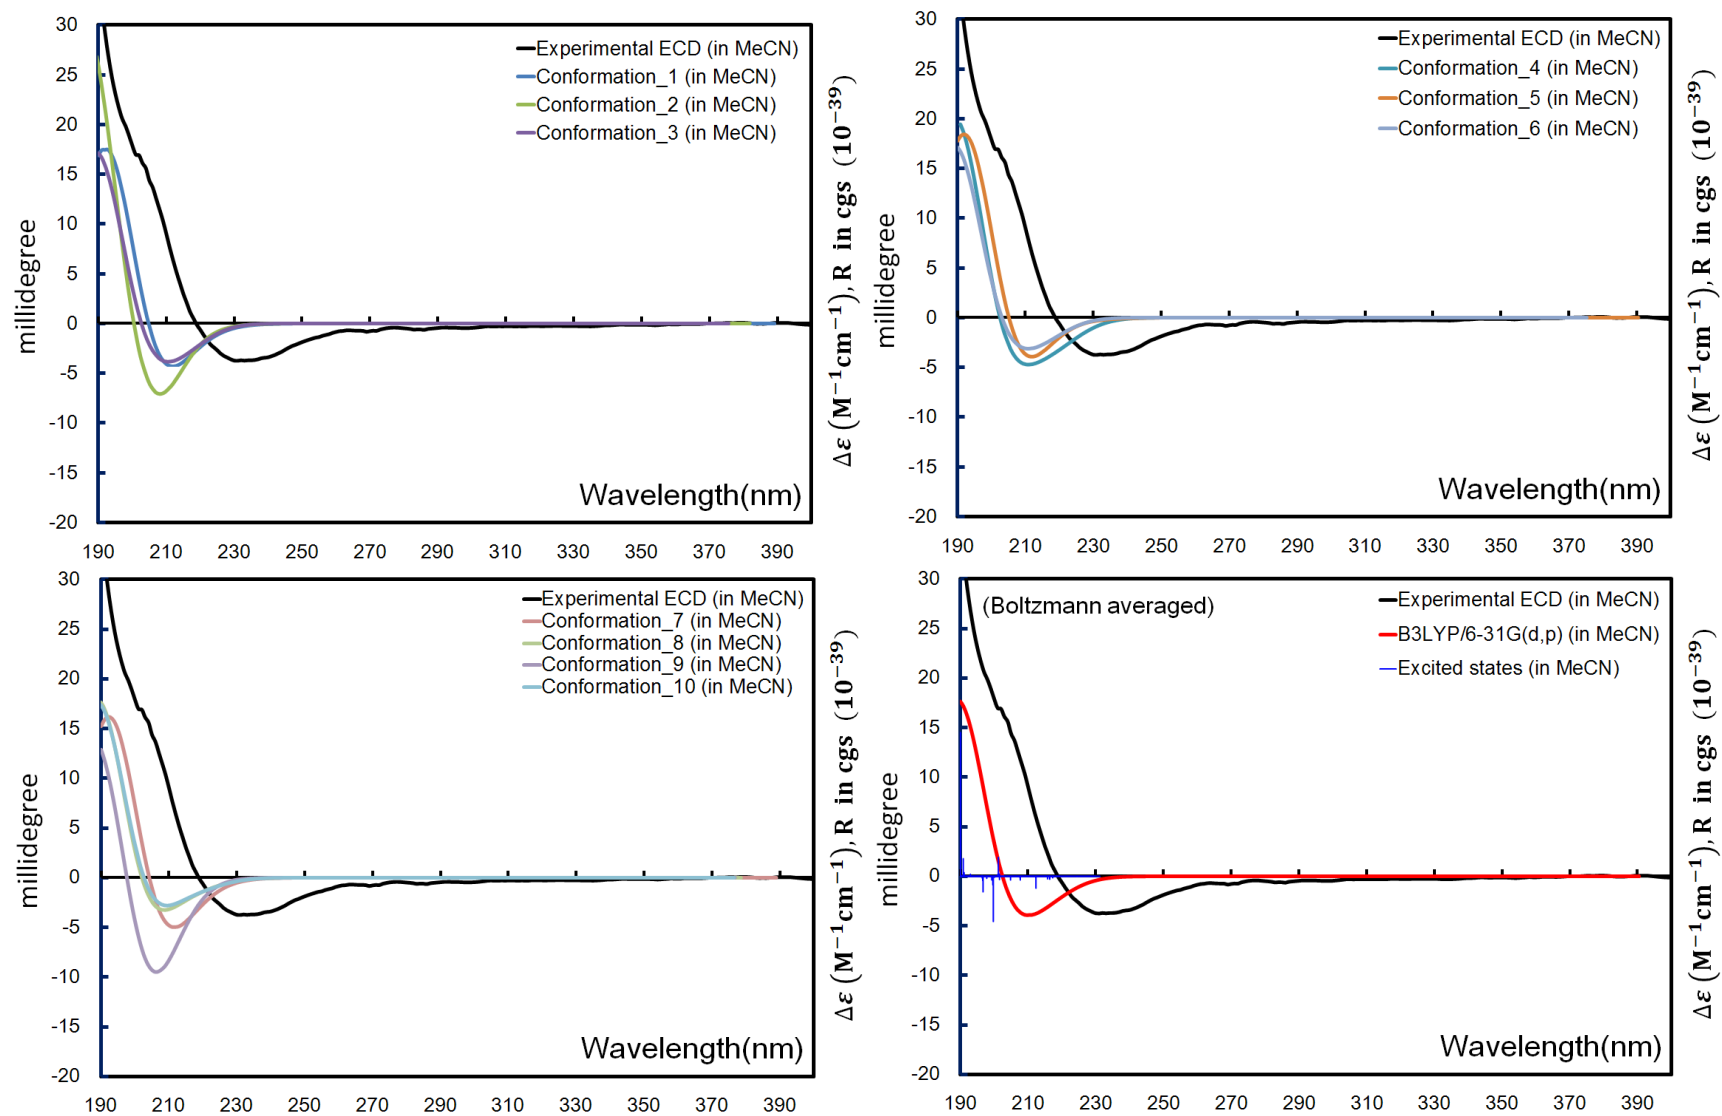

**Table S1.** Calculated thermodynamic energies (in Hartree) of the low energy conformations of **1** at B3LYP/6-31G(d,p) level applying the PCM solvation model (MeCN).

| Species | $E_{\text{total}}$ | $E_{\text{zpc}}$ | $U_{298\text{K}}$ | $H_{298\text{K}}$ | $G_{298\text{K}}$ |
|---------|--------------------|------------------|-------------------|-------------------|-------------------|
| Conf.1  | -1232.7235         | -1232.2260       | -1232.1960        | -1232.1951        | -1232.2880        |
| Conf.2  | -1232.7248         | -1232.2269       | -1232.1969        | -1232.1960        | -1232.2889        |
| Conf.3  | -1232.7209         | -1232.2230       | -1232.1933        | -1232.1924        | -1232.2846        |
| Conf.4  | -1232.7214         | -1232.2229       | -1232.1933        | -1232.1924        | -1232.2836        |
| Conf.5  | -1232.7214         | -1232.2236       | -1232.1937        | -1232.1927        | -1232.2868        |
| Conf.6  | -1232.7188         | -1232.2208       | -1232.1910        | -1232.1900        | -1232.2825        |
| Conf.7  | -1232.7207         | -1232.2232       | -1232.1931        | -1232.1921        | -1232.2879        |
| Conf.8  | -1232.7207         | -1232.2226       | -1232.1928        | -1232.1918        | -1232.2856        |
| Conf.9  | -1232.7207         | -1232.2229       | -1232.1930        | -1232.1921        | -1232.2870        |
| Conf.10 | -1232.7207         | -1232.2221       | -1232.1925        | -1232.1915        | -1232.2837        |

**Table S2.** Calculated relative Boltzmann populations of the low energy conformations of **1** at B3LYP/6-31G(d,p) level applying the PCM solvation model (MeCN).

| Species | $E_{\text{total}}$ | $E_{\text{zpc}}$ | $U_{298\text{K}}$ | $H_{298\text{K}}$ | $G_{298\text{K}}$ |
|---------|--------------------|------------------|-------------------|-------------------|-------------------|
| Conf.1  | 18.83%             | 25.12%           | 24.86%            | 24.84%            | 18.48%            |
| Conf.2  | 71.70%             | 67.33%           | 66.34%            | 66.36%            | 50.41%            |
| Conf.3  | 1.24%              | 1.11%            | 1.44%             | 1.44%             | 0.55%             |
| Conf.4  | 2.04%              | 0.93%            | 1.48%             | 1.48%             | 0.18%             |
| Conf.5  | 2.06%              | 1.97%            | 2.10%             | 2.11%             | 5.40%             |
| Conf.6  | 0.14%              | 0.10%            | 0.12%             | 0.12%             | 0.06%             |
| Conf.7  | 0.97%              | 1.30%            | 1.15%             | 1.15%             | 16.75%            |
| Conf.8  | 1.00%              | 0.71%            | 0.83%             | 0.83%             | 1.59%             |
| Conf.9  | 1.02%              | 0.99%            | 1.06%             | 1.06%             | 6.38%             |
| Conf.10 | 1.01%              | 0.43%            | 0.61%             | 0.61%             | 0.20%             |

**Table S3.** Calculated thermodynamic energies (in Hartree) of the low energy conformations of **2** at B3LYP/6-31G(d,p) level applying the PCM solvation model (MeCN).

| Species | $E_{\text{total}}$ | $E_{\text{zpe}}$ | $U_{298\text{K}}$ | $H_{298\text{K}}$ | $G_{298\text{K}}$ |
|---------|--------------------|------------------|-------------------|-------------------|-------------------|
| Conf.1  | -1158.6999         | -1158.1789       | -1158.1518        | -1158.1509        | -1158.2359        |
| Conf.2  | -1158.6977         | -1158.1769       | -1158.1497        | -1158.1488        | -1158.2342        |
| Conf.3  | -1158.6988         | -1158.1780       | -1158.1510        | -1158.1500        | -1158.2343        |
| Conf.4  | -1158.6974         | -1158.1762       | -1158.1493        | -1158.1483        | -1158.2325        |
| Conf.5  | -1158.6964         | -1158.1754       | -1158.1482        | -1158.1473        | -1158.2325        |
| Conf.6  | -1158.6938         | -1158.1727       | -1158.1457        | -1158.1447        | -1158.2296        |
| Conf.7  | -1158.6985         | -1158.1778       | -1158.1506        | -1158.1496        | -1158.2348        |
| Conf.8  | -1158.6992         | -1158.1783       | -1158.1512        | -1158.1502        | -1158.2356        |
| Conf.9  | -1158.6959         | -1158.1753       | -1158.1480        | -1158.1471        | -1158.2328        |
| Conf.10 | -1158.6963         | -1158.1758       | -1158.1485        | -1158.1475        | -1158.2334        |

**Table S4.** Calculated relative Boltzmann populations of the low energy conformations of **2** at B3LYP/6-31G(d,p) level applying the PCM solvation model (MeCN).

| Species | $E_{\text{total}}$ | $E_{\text{zpe}}$ | $U_{298\text{K}}$ | $H_{298\text{K}}$ | $G_{298\text{K}}$ |
|---------|--------------------|------------------|-------------------|-------------------|-------------------|
| Conf.1  | 45.68%             | 39.86%           | 41.44%            | 41.41%            | 38.85%            |
| Conf.2  | 4.30%              | 4.76%            | 4.58%             | 4.58%             | 6.68%             |
| Conf.3  | 13.09%             | 15.96%           | 16.86%            | 16.86%            | 7.28%             |
| Conf.4  | 2.99%              | 2.22%            | 2.77%             | 2.77%             | 1.09%             |
| Conf.5  | 1.13%              | 0.96%            | 0.93%             | 0.93%             | 1.10%             |
| Conf.6  | 0.07%              | 0.06%            | 0.06%             | 0.06%             | 0.05%             |
| Conf.7  | 10.19%             | 12.53%           | 11.17%            | 11.18%            | 12.29%            |
| Conf.8  | 20.96%             | 21.29%           | 20.22%            | 20.23%            | 28.19%            |
| Conf.9  | 0.62%              | 0.87%            | 0.77%             | 0.77%             | 1.48%             |
| Conf.10 | 0.97%              | 1.47%            | 1.20%             | 1.20%             | 2.99%             |

**Table S5.** Calculated thermodynamic energies (in Hartree) of the low energy conformations of **3** at B3LYP/6-31G(d,p) level applying the PCM solvation model (MeCN).

| Species | $E_{\text{total}}$ | $E_{\text{zpe}}$ | $U_{298\text{K}}$ | $H_{298\text{K}}$ | $G_{298\text{K}}$ |
|---------|--------------------|------------------|-------------------|-------------------|-------------------|
| Conf.1  | -1158.6994         | -1158.1780       | -1158.1513        | -1158.1504        | -1158.2329        |
| Conf.2  | -1158.6999         | -1158.1790       | -1158.1520        | -1158.1510        | -1158.2360        |
| Conf.3  | -1158.6999         | -1158.1786       | -1158.1518        | -1158.1509        | -1158.2333        |
| Conf.4  | -1158.6982         | -1158.1770       | -1158.1501        | -1158.1492        | -1158.2329        |
| Conf.5  | -1158.6991         | -1158.1782       | -1158.1511        | -1158.1502        | -1158.2352        |
| Conf.6  | -1158.6994         | -1158.1783       | -1158.1513        | -1158.1503        | -1158.2354        |
| Conf.7  | -1158.6969         | -1158.1760       | -1158.1490        | -1158.1481        | -1158.2323        |
| Conf.8  | -1158.6970         | -1158.1759       | -1158.1491        | -1158.1481        | -1158.2314        |
| Conf.9  | -1158.6964         | -1158.1754       | -1158.1483        | -1158.1474        | -1158.2327        |
| Conf.10 | -1158.6989         | -1158.1776       | -1158.1508        | -1158.1498        | -1158.2331        |

**Table S6.** Calculated relative Boltzmann populations of the low energy conformations of **3** at B3LYP/6-31G(d,p) level applying the PCM solvation model (MeCN).

| Species | $E_{\text{total}}$ | $E_{\text{zpe}}$ | $U_{298\text{K}}$ | $H_{298\text{K}}$ | $G_{298\text{K}}$ |
|---------|--------------------|------------------|-------------------|-------------------|-------------------|
| Conf.1  | 14.36%             | 10.77%           | 13.35%            | 13.35%            | 1.64%             |
| Conf.2  | 23.97%             | 30.36%           | 26.36%            | 26.34%            | 46.65%            |
| Conf.3  | 23.25%             | 18.59%           | 23.04%            | 23.05%            | 2.69%             |
| Conf.4  | 3.90%              | 3.62%            | 3.82%             | 3.82%             | 1.76%             |
| Conf.5  | 10.41%             | 12.39%           | 10.42%            | 10.43%            | 19.79%            |
| Conf.6  | 13.52%             | 14.66%           | 12.61%            | 12.61%            | 22.77%            |
| Conf.7  | 0.99%              | 1.21%            | 1.18%             | 1.18%             | 0.94%             |
| Conf.8  | 1.12%              | 1.09%            | 1.24%             | 1.24%             | 0.36%             |
| Conf.9  | 0.58%              | 0.68%            | 0.57%             | 0.57%             | 1.37%             |
| Conf.10 | 7.90%              | 6.62%            | 7.42%             | 7.42%             | 2.04%             |

**Table S7.** Calculated thermodynamic energies (in Hartree) of the low energy conformations of **4** at B3LYP/6-31G(d,p) level applying the PCM solvation model (MeCN).

| Species | $E_{\text{total}}$ | $E_{\text{zpe}}$ | $U_{298\text{K}}$ | $H_{298\text{K}}$ | $G_{298\text{K}}$ |
|---------|--------------------|------------------|-------------------|-------------------|-------------------|
| Conf.1  | -1158.6984         | -1158.1773       | -1158.1503        | -1158.1493        | -1158.2338        |
| Conf.2  | -1158.6966         | -1158.1751       | -1158.1484        | -1158.1475        | -1158.2300        |
| Conf.3  | -1158.6938         | -1158.1733       | -1158.1461        | -1158.1452        | -1158.2301        |
| Conf.4  | -1158.6950         | -1158.1746       | -1158.1472        | -1158.1463        | -1158.2318        |
| Conf.5  | -1158.6939         | -1158.1739       | -1158.1465        | -1158.1456        | -1158.2318        |
| Conf.6  | -1158.6932         | -1158.1730       | -1158.1456        | -1158.1447        | -1158.2304        |
| Conf.7  | -1158.6928         | -1158.1726       | -1158.1453        | -1158.1443        | -1158.2303        |
| Conf.8  | -1158.6930         | -1158.1728       | -1158.1454        | -1158.1445        | -1158.2308        |
| Conf.9  | -1158.6972         | -1158.1760       | -1158.1492        | -1158.1482        | -1158.2312        |
| Conf.10 | -1158.6910         | -1158.1711       | -1158.1436        | -1158.1427        | -1158.2299        |

**Table S8.** Calculated relative Boltzmann populations of the low energy conformations of **4** at B3LYP/6-31G(d,p) level applying the PCM solvation model (MeCN).

| Species | $E_{\text{total}}$ | $E_{\text{zpe}}$ | $U_{298\text{K}}$ | $H_{298\text{K}}$ | $G_{298\text{K}}$ |
|---------|--------------------|------------------|-------------------|-------------------|-------------------|
| Conf.1  | 67.83%             | 66.67%           | 64.58%            | 64.58%            | 69.65%            |
| Conf.2  | 10.06%             | 6.75%            | 9.12%             | 9.12%             | 1.18%             |
| Conf.3  | 0.49%              | 1.05%            | 0.83%             | 0.83%             | 1.44%             |
| Conf.4  | 1.80%              | 3.93%            | 2.61%             | 2.61%             | 7.89%             |
| Conf.5  | 0.61%              | 1.98%            | 1.25%             | 1.25%             | 7.82%             |
| Conf.6  | 0.28%              | 0.72%            | 0.48%             | 0.48%             | 1.95%             |
| Conf.7  | 0.18%              | 0.51%            | 0.33%             | 0.33%             | 1.62%             |
| Conf.8  | 0.22%              | 0.60%            | 0.39%             | 0.39%             | 2.87%             |
| Conf.9  | 18.50%             | 17.69%           | 20.36%            | 20.36%            | 4.48%             |
| Conf.10 | 0.03%              | 0.10%            | 0.06%             | 0.06%             | 1.10%             |

**Table S9.** Calculated thermodynamic energies (in Hartree) of the low energy conformations of **5** at B3LYP/6-31G(d,p) level applying the PCM solvation model (MeCN).

| Species | $E_{\text{total}}$ | $E_{\text{zpe}}$ | $U_{298\text{K}}$ | $H_{298\text{K}}$ | $G_{298\text{K}}$ |
|---------|--------------------|------------------|-------------------|-------------------|-------------------|
| Conf.1  | -1158.6945         | -1158.1734       | -1158.1464        | -1158.1454        | -1158.2297        |
| Conf.2  | -1158.6961         | -1158.1746       | -1158.1478        | -1158.1468        | -1158.2309        |
| Conf.3  | -1158.6956         | -1158.1753       | -1158.1479        | -1158.1470        | -1158.2336        |
| Conf.4  | -1158.6936         | -1158.1735       | -1158.1460        | -1158.1451        | -1158.2317        |
| Conf.5  | -1158.6939         | -1158.1727       | -1158.1458        | -1158.1448        | -1158.2284        |
| Conf.6  | -1158.6930         | -1158.1729       | -1158.1453        | -1158.1443        | -1158.2314        |
| Conf.7  | -1158.6912         | -1158.1703       | -1158.1431        | -1158.1422        | -1158.2270        |
| Conf.8  | -1158.6937         | -1158.1733       | -1158.1460        | -1158.1451        | -1158.2306        |
| Conf.9  | -1158.6928         | -1158.1726       | -1158.1453        | -1158.1443        | -1158.2305        |
| Conf.10 | -1158.6949         | -1158.1745       | -1158.1472        | -1158.1462        | -1158.2321        |

**Table S10.** Calculated relative Boltzmann populations of the low energy conformations of **5** at B3LYP/6-31G(d,p) level applying the PCM solvation model (MeCN).

| Species | $E_{\text{total}}$ | $E_{\text{zpe}}$ | $U_{298\text{K}}$ | $H_{298\text{K}}$ | $G_{298\text{K}}$ |
|---------|--------------------|------------------|-------------------|-------------------|-------------------|
| Conf.1  | 7.65%              | 5.13%            | 6.43%             | 6.44%             | 1.05%             |
| Conf.2  | 41.37%             | 19.11%           | 28.03%            | 28.05%            | 3.83%             |
| Conf.3  | 25.18%             | 39.17%           | 33.14%            | 33.12%            | 61.85%            |
| Conf.4  | 3.06%              | 5.89%            | 4.55%             | 4.55%             | 8.79%             |
| Conf.5  | 4.12%              | 2.62%            | 3.51%             | 3.51%             | 0.26%             |
| Conf.6  | 1.72%              | 3.08%            | 2.07%             | 2.07%             | 6.08%             |
| Conf.7  | 0.24%              | 0.20%            | 0.21%             | 0.21%             | 0.06%             |
| Conf.8  | 3.37%              | 4.75%            | 4.67%             | 4.67%             | 2.62%             |
| Conf.9  | 1.37%              | 2.38%            | 2.04%             | 2.04%             | 2.45%             |
| Conf.10 | 11.90%             | 17.66%           | 15.36%            | 15.35%            | 12.99%            |



**Table S11.** Cartesian coordinates of the lowest energy conformation of **1–5** after DFT optimization at B3LYP/6-31G(d,p) level applying the PCM solvation model (MeCN).

| Compound 1_Conf.2 |           |           |           | Compound 2_Conf.1 |           |           |           | Compound 3_Conf.2 |           |           |           | Compound 4_Conf.1 |           |           |           | Compound 5_Conf.3 |           |           |           |
|-------------------|-----------|-----------|-----------|-------------------|-----------|-----------|-----------|-------------------|-----------|-----------|-----------|-------------------|-----------|-----------|-----------|-------------------|-----------|-----------|-----------|
| Symbol            | X         | Y         | Z         | Symbol            | X         | Y         | Z         | Symbol            | X         | Y         | Z         | Symbol            | X         | Y         | Z         | Symbol            | X         | Y         | Z         |
| C                 | 1.986029  | 1.450780  | -0.480225 | C                 | 2.780733  | 0.958869  | -0.105408 | C                 | 2.747271  | -0.911767 | 0.138818  | C                 | -2.690534 | 0.780467  | 0.054862  | C                 | 3.125244  | -0.995662 | -0.060984 |
| C                 | 1.349962  | 2.071760  | -1.723414 | C                 | 2.353533  | 2.065902  | -1.068819 | C                 | 2.317569  | -2.099891 | 0.998569  | C                 | -2.521006 | 1.895266  | 1.084837  | C                 | 2.513871  | -2.229746 | 0.600221  |
| C                 | 0.561916  | 3.329603  | -1.332757 | C                 | 1.478723  | 3.100216  | -0.341198 | C                 | 1.527465  | -3.120727 | 0.160334  | C                 | -1.780930 | 3.090824  | 0.461899  | C                 | 1.381417  | -2.791973 | -0.275096 |
| C                 | -0.366232 | 3.081961  | -0.124703 | C                 | 0.385165  | 2.451535  | 0.532378  | C                 | 0.453455  | -2.455999 | -0.721591 | C                 | -0.523073 | 2.669245  | -0.321533 | C                 | 0.414108  | -1.701791 | -0.778016 |
| O                 | 0.416132  | 2.489827  | 0.939768  | O                 | 1.034321  | 1.457126  | 1.378545  | O                 | 1.112907  | -1.397601 | -1.479629 | O                 | -0.905869 | 1.610780  | -1.246140 | O                 | 1.214585  | -0.640561 | -1.373979 |
| O                 | 0.956138  | 1.206347  | 0.497964  | O                 | 1.611281  | 0.414649  | 0.538272  | O                 | 1.593347  | -0.379423 | -0.554381 | O                 | -1.397152 | 0.455959  | -0.507090 | O                 | 2.074848  | -0.052628 | -0.353737 |
| C                 | 2.623625  | 0.068390  | -0.707542 | C                 | -0.733869 | 1.812934  | -0.315624 | C                 | -0.716682 | -1.891141 | 0.109830  | C                 | 0.624757  | 2.223607  | 0.625554  | C                 | -0.491859 | -1.156386 | 0.351761  |
| C                 | 3.061915  | -0.544525 | 0.617538  | C                 | -1.744058 | 0.986105  | 0.490322  | C                 | -1.646556 | -0.932250 | -0.666631 | C                 | 1.831896  | -2.199982 | 0.760355  | C                 | -5.070003 | -0.594560 | 0.028366  |
| O                 | 3.951037  | 0.234076  | 1.258627  | C                 | -2.763020 | 0.198983  | -0.372794 | C                 | -2.035130 | 0.339734  | 0.139114  | C                 | 3.182715  | -2.590377 | 0.168384  | C                 | -5.578119 | 0.843797  | 0.046990  |
| O                 | 2.686824  | -1.620334 | 1.045917  | C                 | -2.034546 | -0.710271 | -1.371595 | C                 | -2.689878 | -0.059278 | 1.467516  | C                 | 3.493984  | -1.679812 | -1.016958 | C                 | -4.621839 | 1.717043  | -0.761833 |
| C                 | 4.437655  | -0.263643 | 2.522037  | C                 | -2.208269 | -2.738837 | 0.127979  | C                 | -5.029409 | 0.183954  | 0.566479  | C                 | 3.527007  | -0.168121 | -0.666299 | C                 | -3.164840 | 1.719187  | -0.231062 |
| C                 | -1.566224 | 2.240510  | -0.487145 | C                 | -2.949598 | -1.868330 | 1.149334  | C                 | -4.425420 | 0.604913  | -0.778809 | C                 | 2.268862  | 0.256069  | 0.152408  | C                 | -2.645209 | 0.280255  | 0.064841  |
| C                 | -2.055202 | 1.223796  | 0.233458  | C                 | 3.445031  | -0.255791 | -0.774227 | O                 | -0.845681 | 1.102421  | 0.390058  | C                 | 1.739696  | -0.728673 | 1.229093  | C                 | -3.645926 | -0.776267 | 0.600570  |
| C                 | -3.239723 | 0.447960  | -0.229702 | C                 | 3.756473  | -1.299507 | 0.291376  | C                 | 3.310483  | 0.287356  | 0.918753  | C                 | -3.200623 | -0.557695 | 0.618495  | C                 | 4.108543  | -0.206459 | 0.818387  |
| C                 | -3.681963 | -0.760328 | 0.619071  | O                 | 3.175624  | -2.481746 | 0.022335  | C                 | 3.640097  | 1.404389  | -0.065086 | C                 | -4.600320 | -0.425014 | 1.245567  | C                 | 5.315980  | -1.059241 | 1.251738  |
| C                 | -2.474906 | -1.683264 | 0.954579  | C                 | 3.441143  | -3.542844 | 0.963723  | O                 | 2.975856  | 2.536722  | 0.220117  | C                 | -3.250319 | -1.577048 | -0.514223 | C                 | 4.610064  | 1.003183  | 0.038905  |
| C                 | -1.630142 | -2.149648 | -0.238843 | O                 | 4.467371  | -1.101951 | 1.258651  | C                 | 3.241175  | 3.659458  | -0.647552 | O                 | -3.941184 | -1.462029 | -1.508710 | O                 | 5.165912  | 0.941518  | -1.041590 |
| C                 | -0.468783 | -3.046144 | 0.195450  | C                 | 4.747417  | 0.122828  | -1.503723 | O                 | 4.426518  | 1.295026  | -0.986639 | O                 | -2.451625 | -2.631739 | -0.277696 | O                 | 4.396481  | 2.152274  | 0.702694  |
| C                 | 0.485041  | -3.422657 | -0.925973 | C                 | -0.150372 | 3.455017  | 1.557865  | C                 | 4.580427  | -0.082167 | 1.707881  | C                 | -2.446304 | -3.658291 | -1.292787 | C                 | 4.869639  | 3.351966  | 0.055105  |
| O                 | -3.847445 | 0.767025  | -1.247672 | C                 | -2.052809 | -0.490432 | -2.690839 | C                 | -0.023559 | -3.400275 | -1.826983 | C                 | 2.462295  | -0.537735 | 2.575019  | O                 | -3.241987 | -2.118800 | 0.249632  |
| C                 | -4.262300 | -0.205702 | 1.944625  | H                 | 3.233915  | 2.564880  | -1.485590 | C                 | -2.110609 | 0.173514  | 2.649446  | O                 | 0.355336  | -0.498779 | 1.546244  | C                 | -3.673272 | -0.788977 | 2.137695  |
| C                 | -4.778665 | -1.540508 | -0.123380 | H                 | 1.810698  | 1.615456  | -1.908126 | H                 | 3.198798  | -2.587978 | 1.425375  | C                 | 4.814535  | 0.148267  | 0.140120  | C                 | -2.311904 | 2.446873  | -1.294514 |
| C                 | 1.533964  | -4.465174 | -0.602737 | H                 | 2.116316  | 3.707232  | 0.312596  | H                 | 1.715765  | -1.733305 | 1.838040  | C                 | 3.643084  | 0.586535  | -2.009894 | C                 | -3.093592 | 2.562579  | 1.069632  |
| O                 | 0.435304  | -2.885778 | -2.024476 | H                 | 1.018322  | 3.782247  | -1.064235 | H                 | 2.220373  | -3.658390 | -0.497367 | C                 | 1.742101  | 1.477541  | -0.063268 | C                 | -1.324301 | 0.037445  | -0.045120 |
| C                 | -0.837678 | 4.409886  | 0.490008  | H                 | -1.253254 | 2.615999  | -0.849539 | H                 | 1.061119  | -3.864555 | 0.815235  | C                 | -0.083903 | 3.779802  | -1.281289 | C                 | -0.404098 | -2.206227 | -1.968030 |
| H                 | 2.726339  | 2.131495  | -0.040635 | H                 | -0.278691 | 1.179844  | -1.079708 | H                 | -1.280278 | -2.742952 | 0.505190  | H                 | -3.339496 | 1.100575  | -0.769924 | H                 | 3.618986  | -1.262702 | -1.004595 |
| H                 | 2.118815  | 2.336202  | -2.455563 | H                 | -2.317390 | 1.647147  | 1.144542  | H                 | -0.312331 | -1.377197 | 0.984030  | H                 | -3.499472 | 2.223957  | 1.447313  | H                 | 3.276300  | -3.001391 | 0.745079  |
| H                 | 0.689151  | 1.331611  | -2.190684 | H                 | -1.197968 | 0.295250  | 1.136184  | H                 | -1.133397 | -0.596519 | -1.571091 | H                 | -1.971446 | 1.499134  | 1.946224  | H                 | 2.140856  | -1.953128 | 1.593488  |
| H                 | 1.261562  | 4.125564  | -1.053816 | H                 | -2.927241 | -3.278959 | -0.499233 | H                 | -2.544302 | -1.459524 | -0.996692 | H                 | -2.456096 | 3.607873  | -0.230315 | H                 | 1.821228  | -3.281487 | -1.152373 |

Table S11. Cont.

| Compound 1_Conf.2 |           |           |           | Compound 2_Conf.1 |           |           |           | Compound 3_Conf.2 |           |           |           | Compound 4_Conf.1 |           |           |           | Compound 5_Conf.3 |           |           |           |
|-------------------|-----------|-----------|-----------|-------------------|-----------|-----------|-----------|-------------------|-----------|-----------|-----------|-------------------|-----------|-----------|-----------|-------------------|-----------|-----------|-----------|
| Symbol            | X         | Y         | Z         | Symbol            | X         | Y         | Z         | Symbol            | X         | Y         | Z         | Symbol            | X         | Y         | Z         | Symbol            | X         | Y         | Z         |
| H                 | -0.024050 | 3.696288  | -2.181724 | H                 | -1.614572 | -3.500638 | 0.646274  | H                 | -5.973247 | -0.349255 | 0.402694  | H                 | -1.504896 | 3.810736  | 1.239899  | H                 | 0.821948  | -3.557773 | 0.272809  |
| H                 | 4.942871  | -1.221779 | 2.384816  | H                 | 2.914939  | -4.414732 | 0.578440  | H                 | -5.271444 | 1.070105  | 1.165017  | H                 | 1.040829  | 3.150026  | 1.047289  | H                 | -1.105879 | -1.976839 | 0.719097  |
| H                 | 3.611632  | -0.386835 | 3.225426  | H                 | 4.513533  | -3.738895 | 1.025113  | H                 | -4.351229 | -0.277321 | -1.427758 | H                 | 0.227634  | 1.651841  | 1.458729  | H                 | 0.159736  | -0.834785 | 1.173483  |
| H                 | 5.137121  | 0.488562  | 2.883086  | H                 | 3.065107  | -3.276146 | 1.953625  | H                 | -5.102313 | 1.299433  | -1.292639 | H                 | 1.057086  | -2.348398 | -0.004258 | H                 | -5.739979 | -1.271557 | 0.570245  |
| H                 | -2.079171 | 2.516121  | -1.407562 | H                 | 4.551041  | 0.827924  | -2.314274 | H                 | -0.068493 | 0.603533  | 0.092582  | H                 | 1.560584  | -2.838064 | 1.609297  | H                 | -5.054983 | -0.938563 | -1.015586 |
| H                 | -1.558916 | 0.924711  | 1.148836  | H                 | 5.461586  | 0.574714  | -0.809704 | H                 | 2.961366  | 3.419586  | -1.675346 | H                 | 3.972646  | -2.526322 | 0.926823  | H                 | -6.584986 | 0.888595  | -0.384202 |
| H                 | -1.818640 | -1.177392 | 1.673232  | H                 | 5.210681  | -0.766304 | -1.940452 | H                 | 4.299472  | 3.925980  | -0.613073 | H                 | 3.159276  | -3.636572 | -0.158898 | H                 | -5.669761 | 1.212467  | 1.076052  |
| H                 | -2.874484 | -2.557108 | 1.486130  | H                 | 0.666391  | 3.854446  | 2.165499  | H                 | 2.629213  | 4.475017  | -0.265863 | H                 | 4.455583  | -1.949936 | -1.470610 | H                 | -4.618217 | 1.355367  | -1.799688 |
| H                 | -2.250819 | -2.690230 | -0.962063 | H                 | -0.631506 | 4.287934  | 1.036716  | H                 | 4.365452  | -0.845409 | 2.458595  | H                 | 2.728956  | -1.842850 | -1.789029 | H                 | -4.977124 | 2.754235  | -0.796433 |
| H                 | -1.220614 | -1.285381 | -0.772482 | H                 | -0.883157 | 2.995310  | 2.224831  | H                 | 5.357398  | -0.457025 | 1.035903  | H                 | -2.490379 | -0.912419 | 1.371646  | H                 | 3.575149  | 0.151312  | 1.704211  |
| H                 | -0.830317 | -3.964599 | 0.676169  | H                 | -1.540148 | -1.158449 | -3.377657 | H                 | 4.971987  | 0.796652  | 2.227413  | H                 | -5.322019 | -0.065591 | 0.506953  | H                 | 6.010625  | -0.459481 | 1.846387  |
| H                 | 0.148038  | -2.541633 | 0.953526  | H                 | -2.557388 | 0.365696  | -3.126187 | H                 | -0.453625 | -4.299173 | -1.375906 | H                 | -4.943201 | -1.395530 | 1.614620  | H                 | 4.996856  | -1.905109 | 1.864206  |
| H                 | -4.580671 | -1.036239 | 2.583630  | O                 | -3.518365 | 1.216630  | -1.044859 | H                 | -0.786057 | -2.928516 | -2.452088 | H                 | -3.447033 | -4.077365 | -1.415819 | H                 | 5.853426  | -1.440224 | 0.378743  |
| H                 | -5.133860 | 0.429709  | 1.757201  | H                 | -4.116116 | 0.778200  | -1.666097 | H                 | 0.812676  | -3.701180 | -2.464372 | H                 | -2.105839 | -3.248331 | -2.245771 | H                 | 4.615170  | 4.168317  | 0.729141  |
| H                 | -3.525630 | 0.380871  | 2.502251  | H                 | 2.737895  | -0.691097 | -1.486661 | H                 | -2.593372 | -0.117828 | 3.578900  | H                 | -1.754817 | -4.419430 | -0.935353 | H                 | 5.949999  | 3.303330  | -0.096116 |
| H                 | -5.110904 | -2.386633 | 0.486625  | C                 | -1.293599 | -1.884449 | -0.767244 | H                 | -1.146681 | 0.664935  | 2.713599  | H                 | 3.507199  | -0.849392 | 2.535250  | H                 | 4.375139  | 3.483987  | -0.909436 |
| H                 | -4.424793 | -1.926698 | -1.082751 | H                 | -0.456301 | -1.507431 | -0.163623 | H                 | 2.542066  | 0.649450  | 1.608621  | H                 | 2.427197  | 0.510524  | 2.883527  | H                 | -3.116192 | -2.131588 | -0.710001 |
| H                 | -5.642002 | -0.902214 | -0.326685 | H                 | -0.854089 | -2.493829 | -1.564002 | C                 | -4.052301 | -0.708684 | 1.353251  | H                 | 1.956560  | -1.141686 | 3.335538  | H                 | -4.298871 | -1.618966 | 2.482163  |
| H                 | 1.071530  | -5.377246 | -0.211535 | C                 | -3.734103 | -0.689392 | 0.517145  | H                 | -4.445771 | -0.929565 | 2.351136  | H                 | -0.124943 | -0.335608 | 0.715608  | H                 | -2.665442 | -0.920524 | 2.539559  |
| H                 | 2.194977  | -4.070692 | 0.176640  | H                 | -3.652314 | -2.482470 | 1.726610  | H                 | -3.964020 | -1.672511 | 0.830992  | H                 | 4.899620  | -0.437637 | 1.057505  | H                 | -4.083877 | 0.138358  | 2.541857  |
| H                 | 2.119743  | -4.697590 | -1.493548 | H                 | -2.227412 | -1.473452 | 1.875015  | C                 | -3.031517 | 1.275758  | -0.662756 | H                 | 5.699286  | -0.068428 | -0.469870 | H                 | -2.212400 | 1.847411  | -2.204851 |
| H                 | -1.433480 | 4.964340  | -0.239981 | C                 | -4.876666 | -1.244252 | -0.366106 | C                 | -3.160030 | 2.625337  | 0.078195  | H                 | 4.843051  | 1.206994  | 0.416309  | H                 | -2.796601 | 3.392220  | -1.561402 |
| H                 | -1.453208 | 4.225845  | 1.373878  | H                 | -4.510249 | -1.742903 | -1.267517 | H                 | -3.452600 | 2.501754  | 1.123846  | H                 | 4.451809  | 0.144330  | -2.601384 | H                 | -1.308796 | 2.693992  | -0.936349 |
| H                 | 0.024604  | 5.020187  | 0.772510  | H                 | -5.562409 | -0.448040 | -0.674862 | H                 | -3.913352 | 3.250652  | -0.413736 | H                 | 2.718837  | 0.514342  | -2.591480 | H                 | -3.733537 | 2.172075  | 1.864787  |
| H                 | 1.862897  | -0.607663 | -1.109258 | H                 | -5.467725 | -1.971011 | 0.200804  | H                 | -2.208272 | 3.160925  | 0.064475  | H                 | 3.886410  | 1.645247  | -1.881034 | H                 | -2.068334 | 2.588722  | 1.451399  |
| C                 | 3.812130  | 0.137611  | -1.686311 | C                 | -4.380336 | 0.142304  | 1.642101  | C                 | -2.498167 | 1.570372  | -2.077685 | H                 | 2.208925  | 2.067271  | -0.846190 | H                 | -3.410364 | 3.592759  | 0.868058  |
| H                 | 3.478867  | 0.458881  | -2.675701 | H                 | -3.660100 | 0.427453  | 2.414399  | H                 | -3.108645 | 2.345888  | -2.553414 | H                 | 0.149898  | 4.682365  | -0.709531 | H                 | -0.707729 | 0.845104  | -0.428125 |
| H                 | 4.271833  | -0.848613 | -1.794838 | H                 | -5.167878 | -0.441797 | 2.130811  | H                 | -2.527358 | 0.690037  | -2.726999 | H                 | 0.801600  | 3.492580  | -1.853260 | H                 | -0.983806 | -3.083968 | -1.666259 |
| H                 | 4.575137  | 0.834859  | -1.330362 | H                 | -4.834945 | 1.052856  | 1.240705  | H                 | -1.466753 | 1.932817  | -2.033764 | H                 | -0.886908 | 4.016057  | -1.984911 | H                 | -1.093375 | -1.436493 | -2.324746 |
|                   |           |           |           | H                 | 3.446734  | 1.352373  | 0.673883  | H                 | 3.472170  | -1.221358 | -0.624301 | H                 | -4.586008 | 0.266916  | 2.090194  | H                 | 0.252719  | -2.498345 | -2.792105 |

**Figure S58.** A-value (Boltzmann averaged) study of the endoperoxide core: two types (**type I** and **type II**) of simplified substitutions on the C6 position were modeled mimicking the olefinic attachment on **1** and the alkyl attachment on **2–5**, respectively.

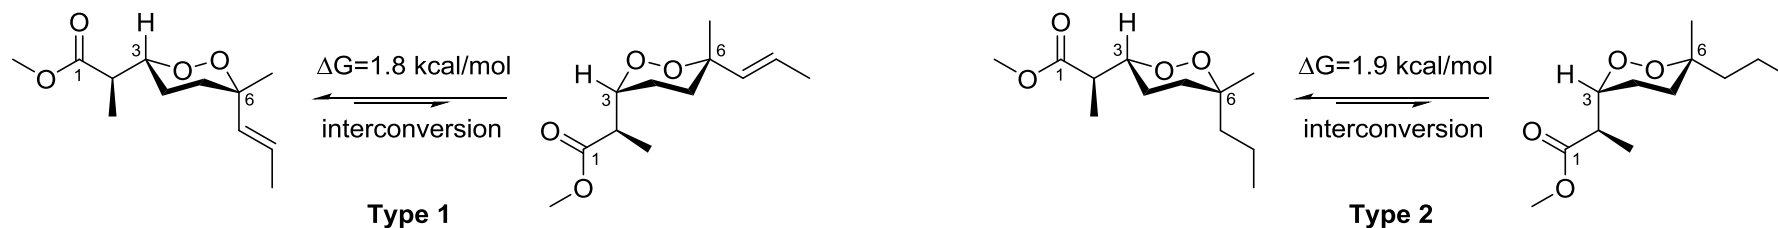

**Table S12.** Calculated thermodynamic energies (in Hartree) of the low energy conformations of **Type I** and **Type II** model by using B3LYP/6-31G(d,p) method applying the PCM solvation model.

| Species                   | $E_{\text{total}}$ | $E_{\text{zpe}}$ | $U_{298\text{K}}$ | $H_{298\text{K}}$ | $G_{298\text{K}}$ |
|---------------------------|--------------------|------------------|-------------------|-------------------|-------------------|
| Type I_6-Methyl_ax_Conf1  | -770.1588          | -769.8500        | -769.8320         | -769.8311         | -769.8965         |
| Type I_6-Methyl_ax_Conf2  | -770.1593          | -769.8502        | -769.8324         | -769.8315         | -769.8962         |
| Type I_6-Methyl_ax_Conf3  | -770.1595          | -769.8505        | -769.8326         | -769.8317         | -769.8967         |
| Type I_6-Methyl_eq_Conf1  | -770.1622          | -769.8534        | -769.8355         | -769.8345         | -769.8998         |
| Type I_6-Methyl_eq_Conf2  | -770.1600          | -769.8511        | -769.8332         | -769.8323         | -769.8974         |
| Type II_6-Methyl_eq_Conf3 | -770.1603          | -769.8516        | -769.8336         | -769.8327         | -769.8986         |
| Type II_6-Methyl_ax_Conf1 | -771.3934          | -771.0604        | -771.0422         | -771.0413         | -771.1075         |
| Type II_6-Methyl_ax_Conf2 | -771.3933          | -771.0603        | -771.0421         | -771.0411         | -771.1071         |
| Type II_6-Methyl_ax_Conf3 | -771.3926          | -771.0597        | -771.0415         | -771.0406         | -771.1068         |
| Type II_6-Methyl_eq_Conf1 | -771.3957          | -771.0629        | -771.0446         | -771.0436         | -771.1104         |
| Type II_6-Methyl_eq_Conf2 | -771.3933          | -771.0603        | -771.0421         | -771.0412         | -771.1073         |
| Type II_6-Methyl_eq_Conf3 | -771.3927          | -771.0597        | -771.0415         | -771.0405         | -771.1066         |

**Table S13.** Cartesian coordinates of the lowest energy conformation of **type I** model after DFT optimization at B3LYP/6-31G(d,p) level applying the PCM solvation model.

| Type I 6-Methyl_ax_Conf3 |           |           |           | Type I 6-Methyl_eq_Conf1 |           |           |           |
|--------------------------|-----------|-----------|-----------|--------------------------|-----------|-----------|-----------|
| Symbol                   | X         | Y         | Z         | Symbol                   | X         | Y         | Z         |
| C                        | 0.946020  | -1.311704 | -0.322758 | C                        | 0.520402  | -0.833434 | 0.335624  |
| C                        | -0.135406 | -2.258061 | 0.210483  | C                        | -0.644200 | -1.101516 | 1.288476  |
| C                        | -1.367629 | -1.484158 | 0.701855  | C                        | -1.887961 | -1.535599 | 0.497600  |
| C                        | -1.826115 | -0.404413 | -0.306634 | C                        | -2.160344 | -0.620152 | -0.709050 |
| O                        | -0.652470 | 0.399197  | -0.660056 | O                        | -0.928092 | -0.537716 | -1.483698 |
| O                        | 0.354120  | -0.444878 | -1.311010 | O                        | 0.097355  | 0.106464  | -0.672043 |
| C                        | 1.723403  | -0.492157 | 0.728592  | C                        | 1.744522  | -0.164977 | 0.981072  |
| C                        | 2.704455  | 0.408986  | -0.008455 | C                        | 2.806839  | 0.064309  | -0.087144 |
| O                        | 2.551244  | 1.703114  | 0.322544  | O                        | 3.201152  | 1.348532  | -0.135613 |
| O                        | 3.550271  | 0.010768  | -0.787972 | O                        | 3.272057  | -0.810694 | -0.792906 |
| C                        | 3.459942  | 2.627126  | -0.311593 | C                        | 4.235198  | 1.653953  | -1.094686 |
| C                        | -2.688516 | 0.616593  | 0.401192  | C                        | -2.628986 | 0.781414  | -0.378675 |
| C                        | -3.960352 | 0.918630  | 0.126708  | C                        | -3.265007 | 1.184378  | 0.723730  |
| C                        | -2.455143 | -0.989815 | -1.570517 | C                        | -3.125921 | -1.278313 | -1.705567 |
| H                        | 1.674718  | -1.869822 | -0.922517 | H                        | 0.836606  | -1.757026 | -0.166919 |
| H                        | 0.259283  | -2.887914 | 1.012875  | H                        | -0.375623 | -1.883979 | 2.004936  |
| H                        | -2.195931 | -2.173186 | 0.896949  | H                        | -0.851815 | -0.188122 | 1.856982  |
| H                        | 4.492906  | 2.385611  | -0.052316 | H                        | -1.734876 | -2.549910 | 0.111158  |
| H                        | 3.342722  | 2.592290  | -1.396694 | H                        | -2.764065 | -1.576840 | 1.152021  |
| H                        | 3.191007  | 3.611028  | 0.069554  | H                        | 4.433651  | 2.718634  | -0.982492 |
| H                        | -2.191829 | 1.115750  | 1.233623  | H                        | 5.134953  | 1.072239  | -0.884044 |
| H                        | -3.339978 | -1.583245 | -1.324700 | H                        | 3.891382  | 1.433835  | -2.107469 |
| H                        | -2.748932 | -0.189126 | -2.254213 | H                        | -2.448473 | 1.496203  | -1.182240 |
| H                        | -1.742989 | -1.634037 | -2.087535 | H                        | -4.079054 | -1.478181 | -1.209130 |
| H                        | 1.027556  | 0.143115  | 1.279367  | H                        | -3.311211 | -0.621089 | -2.559629 |
| C                        | 2.507118  | -1.382878 | 1.710651  | H                        | -2.713970 | -2.223794 | -2.071232 |
| H                        | 3.091884  | -0.769809 | 2.402545  | H                        | 1.441234  | 0.807988  | 1.379279  |
| H                        | 3.196779  | -2.040633 | 1.173089  | C                        | 2.349037  | -1.018947 | 2.111925  |
| H                        | 1.830603  | -1.999807 | 2.306496  | H                        | 3.235825  | -0.529835 | 2.524555  |
| C                        | -4.783999 | 1.909845  | 0.895921  | H                        | 2.643971  | -2.003464 | 1.737893  |
| H                        | -5.667134 | 1.429445  | 1.335224  | H                        | 1.632821  | -1.152518 | 2.925423  |
| H                        | -5.158288 | 2.702563  | 0.236413  | C                        | -3.767361 | 2.580375  | 0.957902  |
| H                        | -4.210432 | 2.375375  | 1.702500  | H                        | -3.322841 | 3.013114  | 1.862806  |
| H                        | -0.414209 | -2.932983 | -0.605437 | H                        | -4.853745 | 2.588150  | 1.111773  |
| H                        | -1.138585 | -0.989014 | 1.652301  | H                        | -3.537714 | 3.239014  | 0.115143  |
| H                        | -4.467134 | 0.420819  | -0.698227 | H                        | -3.454142 | 0.473943  | 1.528034  |

**Table S14.** Cartesian coordinates of the lowest energy conformation of **type II** model after DFT optimization at B3LYP/6-31G(d,p) level applying the PCM solvation model.

| Type II 6-Methyl_ax_Conf1 |           |           |           | Type II 6-Methyl_eq_Conf1 |           |           |           |
|---------------------------|-----------|-----------|-----------|---------------------------|-----------|-----------|-----------|
| Symbol                    | X         | Y         | Z         | Symbol                    | X         | Y         | Z         |
| C                         | 1.000446  | -1.337659 | -0.381617 | C                         | -0.644290 | -1.024364 | -0.056076 |
| C                         | 0.038448  | -2.397205 | 0.170195  | C                         | 0.336159  | -1.828650 | -0.908137 |
| C                         | -1.226047 | -1.759472 | 0.764951  | C                         | 1.665791  | -2.005412 | -0.155882 |
| C                         | -1.822119 | -0.674073 | -0.155784 | C                         | 2.180164  | -0.692891 | 0.471354  |
| O                         | -0.746059 | 0.241081  | -0.510436 | O                         | 1.086111  | -0.112996 | 1.239199  |
| O                         | 0.274790  | -0.472086 | -1.278627 | O                         | -0.016054 | 0.210834  | 0.340816  |
| C                         | 1.782216  | -0.512032 | 0.661670  | C                         | -1.925948 | -0.580003 | -0.779837 |
| C                         | 2.634270  | 0.509082  | -0.078883 | C                         | -2.783616 | 0.226310  | 0.187967  |
| O                         | 2.425429  | 1.760067  | 0.368665  | O                         | -3.074281 | 1.447410  | -0.292746 |
| O                         | 3.437135  | 0.233433  | -0.951112 | O                         | -3.185695 | -0.189870 | 1.258215  |
| C                         | 3.224053  | 2.791708  | -0.247081 | C                         | -3.909608 | 2.271528  | 0.547295  |
| C                         | -2.466882 | -1.260527 | -1.415774 | C                         | 3.220870  | -0.988813 | 1.555303  |
| H                         | 1.726950  | -1.802791 | -1.058463 | H                         | -0.917133 | -1.577719 | 0.852286  |
| H                         | -0.228592 | -3.062194 | -0.657712 | H                         | -0.080937 | -2.813139 | -1.141814 |
| H                         | 0.536531  | -3.020821 | 0.918146  | H                         | 0.490080  | -1.307656 | -1.860245 |
| H                         | -1.977819 | -2.532360 | 0.959039  | H                         | 1.519654  | -2.730687 | 0.653421  |
| H                         | -0.989943 | -1.297894 | 1.730824  | H                         | 2.427852  | -2.420393 | -0.824501 |
| H                         | 2.931951  | 3.719719  | 0.241977  | H                         | -4.042463 | 3.204979  | 0.002743  |
| H                         | 4.287013  | 2.595492  | -0.091564 | H                         | -4.873355 | 1.787659  | 0.718745  |
| H                         | 3.019647  | 2.843832  | -1.318493 | H                         | -3.421330 | 2.454477  | 1.506715  |
| H                         | -3.359933 | -1.834203 | -1.148902 | H                         | 4.093964  | -1.468999 | 1.103607  |
| H                         | -2.760246 | -0.465833 | -2.105582 | H                         | 3.549650  | -0.075664 | 2.056350  |
| H                         | -1.778454 | -1.923213 | -1.942530 | H                         | 2.807048  | -1.665482 | 2.308157  |
| H                         | 1.080070  | 0.030980  | 1.296892  | H                         | -1.647952 | 0.068007  | -1.616590 |
| C                         | 2.705141  | -1.383844 | 1.534440  | C                         | -2.745126 | -1.775326 | -1.301280 |
| H                         | 3.292581  | -0.759827 | 2.214230  | H                         | -3.662832 | -1.426176 | -1.782761 |
| H                         | 3.399801  | -1.957534 | 0.913525  | H                         | -3.022138 | -2.441771 | -0.479520 |
| H                         | 2.126223  | -2.080977 | 2.144556  | H                         | -2.177331 | -2.345680 | -2.039471 |
| C                         | -2.787769 | 0.224347  | 0.641913  | C                         | 2.700342  | 0.295313  | -0.591604 |
| H                         | -2.224571 | 0.653373  | 1.480613  | H                         | 1.937299  | 0.409285  | -1.368550 |
| H                         | -3.547391 | -0.432764 | 1.085449  | H                         | 3.567054  | -0.171194 | -1.078114 |
| C                         | -3.473552 | 1.356988  | -0.135066 | C                         | 3.083111  | 1.689755  | -0.078884 |
| H                         | -2.713493 | 1.959113  | -0.645690 | H                         | 2.233185  | 2.115058  | 0.466273  |
| H                         | -4.116354 | 0.938537  | -0.917921 | H                         | 3.907417  | 1.617105  | 0.640566  |
| C                         | -4.314559 | 2.254580  | 0.778589  | C                         | 3.493958  | 2.632248  | -1.215128 |
| H                         | -3.695960 | 2.724208  | 1.551784  | H                         | 2.678883  | 2.763621  | -1.936022 |
| H                         | -5.098317 | 1.680529  | 1.286229  | H                         | 4.358900  | 2.240865  | -1.763003 |
| H                         | -4.801932 | 3.053323  | 0.210356  | H                         | 3.762983  | 3.622300  | -0.832695 |

**Figure S59.** Study of the 1,3-diaxial interaction vs. 1,3-allylic strain in the monoterpene ring of **4** and **5**: C7 positions were replaced with methyl groups for the model study represented as **m1** and **m2**.

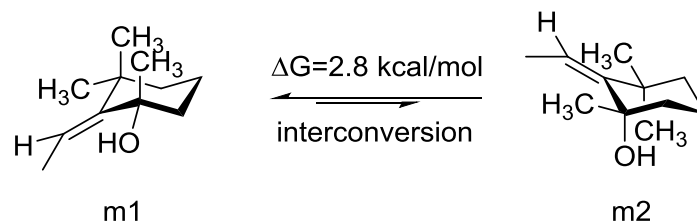

**Table S15.** Calculated thermodynamic energies (in Hartree) of **m1** and **m2** by using B3LYP/6-31G(d,p) method applying the PCM solvation model.

| Species   | $E_{\text{total}}$ | $E_{\text{zpe}}$ | $U_{298\text{K}}$ | $H_{298\text{K}}$ | $G_{298\text{K}}$ |
|-----------|--------------------|------------------|-------------------|-------------------|-------------------|
| <b>m1</b> | -506.4543          | -506.1633        | -506.1499         | -506.1489         | -506.2013         |
| <b>m2</b> | -506.4510          | -506.1593        | -506.1461         | -506.1452         | -506.1969         |

**Table S16.** Cartesian coordinates of the lowest energy conformations of **m1** and **m2** after DFT optimization at B3LYP/6-31G(d,p) level applying the PCM solvation model.

| <b>m1</b>     |           |           |           | <b>m2</b>     |           |           |           |
|---------------|-----------|-----------|-----------|---------------|-----------|-----------|-----------|
| <b>Symbol</b> | <b>X</b>  | <b>Y</b>  | <b>Z</b>  | <b>Symbol</b> | <b>X</b>  | <b>Y</b>  | <b>Z</b>  |
| C             | 0.033819  | -1.966160 | -0.647839 | C             | 0.034090  | -1.904423 | -0.757396 |
| H             | -0.373336 | -2.956759 | -0.415600 | H             | 0.269158  | -1.710138 | -1.811786 |
| C             | -0.878771 | -0.909213 | 0.015719  | H             | 0.391274  | -2.915776 | -0.530567 |
| C             | -0.291753 | 0.522388  | -0.079647 | C             | 0.850035  | -0.916798 | 0.100909  |
| C             | 1.251972  | 0.699417  | 0.028187  | C             | 0.321880  | 0.530996  | -0.051467 |
| C             | 2.016688  | -0.467040 | -0.650723 | C             | -1.225438 | 0.704888  | 0.042208  |
| H             | 3.082803  | -0.365491 | -0.413226 | C             | -1.942185 | -0.374320 | -0.813850 |
| H             | 1.929470  | -0.356964 | -1.740861 | H             | -1.770051 | -0.143924 | -1.875129 |
| C             | 1.506511  | -1.854181 | -0.266033 | H             | -3.023588 | -0.287599 | -0.648630 |
| H             | 1.645642  | -2.038358 | 0.806317  | C             | -1.472494 | -1.801073 | -0.542361 |
| H             | 2.086803  | -2.625526 | -0.785859 | H             | -1.992364 | -2.499609 | -1.209030 |
| C             | -1.070670 | 1.618476  | -0.158233 | H             | -1.720511 | -2.101265 | 0.481525  |
| H             | -0.555856 | 2.573248  | -0.231397 | C             | 1.088424  | 1.630848  | -0.190560 |
| C             | -2.568196 | 1.789443  | -0.118574 | H             | 0.548285  | 2.569418  | -0.255366 |
| H             | -2.821670 | 2.563968  | 0.616412  | C             | 2.586297  | 1.847801  | -0.259155 |
| H             | -3.104990 | 0.876354  | 0.124922  | H             | 3.065942  | 1.309490  | -1.081118 |
| H             | -2.942289 | 2.157426  | -1.084217 | H             | 3.100220  | 1.553019  | 0.661961  |
| O             | -2.156189 | -1.006119 | -0.650134 | H             | 2.788464  | 2.911768  | -0.409121 |
| H             | -2.042461 | -0.627051 | -1.533532 | O             | 0.645190  | -1.359275 | 1.470137  |
| C             | -1.192783 | -1.295229 | 1.470650  | H             | 1.049758  | -0.692793 | 2.043377  |
| H             | -0.284784 | -1.407639 | 2.066160  | C             | 2.333715  | -1.135746 | -0.230227 |
| H             | -1.728749 | -2.250037 | 1.482669  | H             | 2.577492  | -0.833420 | -1.252218 |
| H             | -1.820563 | -0.535559 | 1.943205  | H             | 2.549021  | -2.203982 | -0.131633 |
| C             | 1.655985  | 0.777345  | 1.524242  | H             | 2.992105  | -0.603249 | 0.457509  |
| H             | 1.430986  | -0.139785 | 2.073645  | C             | -1.717171 | 2.070015  | -0.485542 |
| H             | 1.128844  | 1.598762  | 2.019336  | H             | -1.367774 | 2.263543  | -1.504875 |
| H             | 2.733488  | 0.958854  | 1.614637  | H             | -1.405048 | 2.904998  | 0.149123  |
| C             | 1.747956  | 1.998993  | -0.644484 | H             | -2.812387 | 2.073206  | -0.499135 |
| H             | 1.434807  | 2.898763  | -0.107376 | C             | -1.688028 | 0.600580  | 1.519097  |
| H             | 1.394522  | 2.075767  | -1.677646 | H             | -1.213808 | 1.385627  | 2.118595  |
| H             | 2.843189  | 2.002671  | -0.659788 | H             | -1.428264 | -0.360257 | 1.962148  |
| H             | -0.050885 | -1.839126 | -1.736330 | H             | -2.774189 | 0.738533  | 1.583333  |

**Table S17.** Bioactivities of the compounds **1–6** against A549 (lung carcinoma).

| <b>Species</b> | <b>0.5 µg/mL</b><br><b>(Inhibition, %)</b> | <b>1 µg/mL</b><br><b>(Inhibition, %)</b> | <b>10 µg/mL</b><br><b>(Inhibition, %)</b> | <b>50 µg/mL</b><br><b>(Inhibition, %)</b> | <b>100 µg/mL</b><br><b>(Inhibition, %)</b> |
|----------------|--------------------------------------------|------------------------------------------|-------------------------------------------|-------------------------------------------|--------------------------------------------|
| <b>1</b>       | -22.09                                     | -13.85                                   | -3.16                                     | 24.74                                     | 73.61                                      |
| <b>2</b>       | -47.21                                     | -18.58                                   | -5.46                                     | 3.69                                      | 47.33                                      |
| <b>3</b>       | 18.81                                      | 22.12                                    | 27.70                                     | 58.60                                     | 84.34                                      |
| <b>4</b>       | 13.89                                      | 21.59                                    | 23.86                                     | 29.28                                     | 18.24                                      |
| <b>5</b>       | -11.98                                     | -0.51                                    | 0.03                                      | 3.83                                      | 17.37                                      |
| <b>6</b>       | 17.37                                      | 16.80                                    | 23.35                                     | 48.41                                     | 65.42                                      |

**Table S18.** Bioactivities of the compounds 1–6 against HeLa (cervical cancer).

| Species | 0.5 µg/mL<br>(Inhibition, %) | 1 µg/mL<br>(Inhibition, %) | 10 µg/mL<br>(Inhibition, %) | 50 µg/mL<br>(Inhibition, %) | 100 µg/mL<br>(Inhibition, %) |
|---------|------------------------------|----------------------------|-----------------------------|-----------------------------|------------------------------|
| 1       | −6.64                        | −1.03                      | 7.18                        | 38.67                       | 67.37                        |
| 2       | −10.47                       | −8.09                      | −0.06                       | 19.02                       | 43.31                        |
| 3       | 21.46                        | 21.94                      | 29.22                       | 58.07                       | 76.25                        |
| 4       | 18.05                        | 17.39                      | 31.90                       | 36.19                       | 40.69                        |
| 5       | −3.27                        | −5.84                      | 5.43                        | 31.00                       | 43.38                        |
| 6       | 21.46                        | 21.55                      | 29.61                       | 43.56                       | 53.07                        |

**Table S19.** Bioactivities of the compounds 1–6 against QGY-7703 (hepatocarcinoma).

| Species | 0.5 µg/mL<br>(Inhibition, %) | 1 µg/mL<br>(Inhibition, %) | 10 µg/mL<br>(Inhibition, %) | 50 µg/mL<br>(Inhibition, %) | 100 µg/mL<br>(Inhibition, %) |
|---------|------------------------------|----------------------------|-----------------------------|-----------------------------|------------------------------|
| 1       | −23.35                       | −3.94                      | 4.79                        | 22.90                       | 37.92                        |
| 2       | −10.69                       | −2.46                      | 7.56                        | 19.68                       | 26.52                        |
| 3       | 6.40                         | 11.76                      | 17.40                       | 28.35                       | 69.95                        |
| 4       | 11.49                        | 9.79                       | 13.55                       | 23.93                       | 27.91                        |
| 5       | −26.17                       | −15.96                     | −6.68                       | 7.83                        | 17.81                        |
| 6       | 24.98                        | 19.04                      | 19.48                       | 35.58                       | 44.94                        |

**Table S20.** Bioactivities of the compounds 1–6 against MDA-MB-231 (human breast adenocarcinoma).

| Species | 0.5 µg/mL<br>(Inhibition, %) | 1 µg/mL<br>(Inhibition, %) | 10 µg/mL<br>(Inhibition, %) | 50 µg/mL<br>(Inhibition, %) | 100 µg/mL<br>(Inhibition, %) |
|---------|------------------------------|----------------------------|-----------------------------|-----------------------------|------------------------------|
| 1       | −70.26                       | −50.50                     | −49.31                      | −43.75                      | 2.45                         |
| 2       | −65.04                       | −34.17                     | −36.22                      | −52.02                      | −52.15                       |
| 3       | −18.37                       | −14.94                     | −17.18                      | −25.25                      | 41.97                        |
| 4       | −13.48                       | −4.36                      | −9.52                       | −6.08                       | −30.27                       |
| 5       | −49.56                       | −27.59                     | −32.00                      | −38.24                      | −25.36                       |
| 6       | −7.53                        | −7.39                      | 0.75                        | 3.19                        | −12.81                       |
